# Supplementary material
Source: publisher figshare collection journal article supplement (https://acs.figshare.com/ndownloader/files/4312234)
Supplement: Supplementary file 1 [file 4312234]

 
 
data_Ni(I)IMes2Cl 
 
_audit_creation_method            SHELXL-97 
_chemical_name_systematic 
; 
 ? 
; 
_chemical_name_common             ? 
_chemical_melting_point           ? 
_chemical_formula_moiety          'C42 H48 Cl N4 Ni' 
_chemical_formula_sum 
 'C42 H48 Cl N4 Ni' 
_chemical_formula_weight          703.00 
 
loop_ 
 _atom_type_symbol 
 _atom_type_description 
 _atom_type_scat_dispersion_real 
 _atom_type_scat_dispersion_imag 
 _atom_type_scat_source 
 'C'  'C'   0.0033   0.0016 
 'International Tables Vol C Tables 4.2.6.8 and 6.1.1.4' 
 'H'  'H'   0.0000   0.0000 
 'International Tables Vol C Tables 4.2.6.8 and 6.1.1.4' 
 'N'  'N'   0.0061   0.0033 
 'International Tables Vol C Tables 4.2.6.8 and 6.1.1.4' 
 'Cl'  'Cl'   0.1484   0.1585 
 'International Tables Vol C Tables 4.2.6.8 and 6.1.1.4' 
 'Ni'  'Ni'   0.3393   1.1124 
 'International Tables Vol C Tables 4.2.6.8 and 6.1.1.4' 
 
_symmetry_cell_setting            orthorhombic 
_symmetry_space_group_name_H-M    Pbca
 
loop_ 
 _symmetry_equiv_pos_as_xyz 
 'x, y, z' 
 '-x+1/2, -y, z+1/2' 
 'x+1/2, -y+1/2, -z' 
 '-x, y+1/2, -z+1/2' 
 '-x, -y, -z' 
 'x-1/2, y, -z-1/2' 
 '-x-1/2, y-1/2, z' 
 'x, -y-1/2, z-1/2' 
 
_cell_length_a                    17.1089(7) 
_cell_length_b                    18.8373(6) 
_cell_length_c                    23.2591(9) 
_cell_angle_alpha                 90.00 
_cell_angle_beta                  90.00 
_cell_angle_gamma                 90.00 
_cell_volume                      7496.1(5) 
_cell_formula_units_Z             8 
_cell_measurement_temperature     150(1) 
_cell_measurement_reflns_used     14255 
_cell_measurement_theta_min       1.018
_cell_measurement_theta_max       27.485 
 
_exptl_crystal_description        plate
_exptl_crystal_colour             yellow
_exptl_crystal_size_max           0.35 
_exptl_crystal_size_mid           0.28 
_exptl_crystal_size_min           0.13 
_exptl_crystal_density_meas       ? 
_exptl_crystal_density_diffrn     1.246 
_exptl_crystal_density_method     'not measured' 
_exptl_crystal_F_000              2984 
_exptl_absorpt_coefficient_mu     0.623 
_exptl_absorpt_correction_type    Multi-scan 
_exptl_absorpt_correction_T_min   0.8114 
_exptl_absorpt_correction_T_max   0.9234 
_exptl_absorpt_process_details    'DENZO-SMN (Otwinowski & Minor, 1997)' 
 
_exptl_special_details 
; 
 The program Denzo-SMN (Otwinowski & Minor, 1997) uses a scaling
 algorithm (Fox & Holmes, 1966) which effectively corrects for
 absorption effects. High redundancy data were used in the scaling
 program hence the 'multi-scan' code word was used. No transmission
 coefficients are available from the program (only scale factors for each
 frame). The scale factors in the experimental table are calculated
 from the 'size' command in the SHELXL-97 input file. 
; 
 
_diffrn_ambient_temperature       150(1) 
_diffrn_radiation_wavelength      0.71073 
_diffrn_radiation_type            MoK\a 
_diffrn_radiation_source          'fine-focus sealed tube' 
_diffrn_radiation_monochromator   graphite 
_diffrn_measurement_device_type   'Nonius KappaCCD Diffractometer' 
_diffrn_measurement_method        'Phi and Omega scan'
_diffrn_detector_area_resol_mean  ? 
_diffrn_standards_number          ? 
_diffrn_standards_interval_count  ? 
_diffrn_standards_interval_time   ? 
_diffrn_standards_decay_%         ? 
_diffrn_reflns_number             16575 
_diffrn_reflns_av_R_equivalents   0.0583 
_diffrn_reflns_av_sigmaI/netI     0.0760 
_diffrn_reflns_limit_h_min        -22 
_diffrn_reflns_limit_h_max        22 
_diffrn_reflns_limit_k_min        -24 
_diffrn_reflns_limit_k_max        24 
_diffrn_reflns_limit_l_min        -30 
_diffrn_reflns_limit_l_max        30 
_diffrn_reflns_theta_min          2.33 
_diffrn_reflns_theta_max          27.84 
_reflns_number_total              8832 
_reflns_number_gt                 5411 
_reflns_threshold_expression      >2sigma(I) 
 
_computing_data_collection        'Nonius COLLECT' 
_computing_cell_refinement        DENZO-SMN 
_computing_data_reduction         DENZO-SMN
_computing_structure_solution     SIR97 
_computing_structure_refinement   'SHELXL-97 (Sheldrick, 1997)' 
_computing_molecular_graphics     'WinGX, Ortep3' 
_computing_publication_material   ? 
 
_refine_special_details 
; 
 Refinement of F^2^ against ALL reflections.  The weighted R-factor wR and 
 goodness of fit S are based on F^2^, conventional R-factors R are based 
 on F, with F set to zero for negative F^2^. The threshold expression of 
 F^2^ > 2sigma(F^2^) is used only for calculating R-factors(gt) etc. and is 
 not relevant to the choice of reflections for refinement.  R-factors based 
 on F^2^ are statistically about twice as large as those based on F, and R- 
 factors based on ALL data will be even larger. 
; 
 
_refine_ls_structure_factor_coef  Fsqd  
_refine_ls_matrix_type            full 
_refine_ls_weighting_scheme       calc  
_refine_ls_weighting_details 
 'calc w=1/[\s^2^(Fo^2^)+(0.0413P)^2^+2.6574P] where P=(Fo^2^+2Fc^2^)/3' 
_atom_sites_solution_primary      direct 
_atom_sites_solution_secondary    difmap 
_atom_sites_solution_hydrogens    geom 
_refine_ls_hydrogen_treatment     mixed 
_refine_ls_extinction_method      none 
_refine_ls_extinction_coef        ? 
_refine_ls_number_reflns          8832 
_refine_ls_number_parameters      553 
_refine_ls_number_restraints      0 
_refine_ls_R_factor_all           0.1085 
_refine_ls_R_factor_gt            0.0506 
_refine_ls_wR_factor_ref          0.1088 
_refine_ls_wR_factor_gt           0.0936 
_refine_ls_goodness_of_fit_ref    1.020 
_refine_ls_restrained_S_all       1.020 
_refine_ls_shift/su_max           0.001 
_refine_ls_shift/su_mean          0.000 
 
loop_ 
 _atom_site_label 
 _atom_site_type_symbol 
 _atom_site_fract_x 
 _atom_site_fract_y 
 _atom_site_fract_z 
 _atom_site_U_iso_or_equiv 
 _atom_site_adp_type 
 _atom_site_occupancy 
 _atom_site_symmetry_multiplicity 
 _atom_site_calc_flag 
 _atom_site_refinement_flags 
 _atom_site_disorder_assembly 
 _atom_site_disorder_group 
Ni1 Ni 0.128846(17) 0.146577(16) 0.338309(13) 0.02798(10) Uani 1 1 d . . . 
Cl1 Cl 0.25986(4) 0.12659(4) 0.35337(3) 0.03916(17) Uani 0.93 1 d P . . 
Cl1A Cl 0.0042(5) 0.1641(5) 0.3219(4) 0.039(2) Uiso 0.07 1 d P . . 
N1 N 0.10607(13) 0.00753(11) 0.39488(9) 0.0400(5) Uani 1 1 d . . . 
N2 N 0.06888(12) 0.00380(11) 0.30718(9) 0.0362(5) Uani 1 1 d . . . 
N3 N 0.11012(11) 0.30297(10) 0.35771(8) 0.0317(5) Uani 1 1 d . . . 
N4 N 0.17150(12) 0.27962(11) 0.27994(9) 0.0338(5) Uani 1 1 d . . . 
C1 C 0.09766(14) 0.04982(13) 0.34739(10) 0.0328(6) Uani 1 1 d . . . 
C2 C 0.0840(2) -0.06216(16) 0.38401(14) 0.0534(8) Uani 1 1 d . . . 
C3 C 0.06065(19) -0.06435(16) 0.32933(13) 0.0499(8) Uani 1 1 d . . . 
C4 C 0.13213(17) 0.03302(13) 0.45018(11) 0.0399(6) Uani 1 1 d . . . 
C5 C 0.08055(16) 0.07427(14) 0.48293(11) 0.0398(6) Uani 1 1 d . . . 
C6 C 0.10677(17) 0.09774(15) 0.53631(12) 0.0429(7) Uani 1 1 d . . . 
C7 C 0.18146(18) 0.08361(15) 0.55674(12) 0.0463(7) Uani 1 1 d . . . 
C8 C 0.22986(19) 0.04165(16) 0.52277(13) 0.0504(8) Uani 1 1 d . . . 
C9 C 0.20616(17) 0.01543(15) 0.46966(12) 0.0457(7) Uani 1 1 d . . . 
C10 C 0.00047(18) 0.09265(19) 0.46142(15) 0.0476(8) Uani 1 1 d . . . 
C11 C 0.2081(2) 0.11302(17) 0.61355(13) 0.0597(9) Uani 1 1 d . . . 
H11A H 0.2556 0.0882 0.6259 0.090 Uiso 1 1 calc R . . 
H11B H 0.1670 0.1062 0.6423 0.090 Uiso 1 1 calc R . . 
H11C H 0.2192 0.1638 0.6095 0.090 Uiso 1 1 calc R . . 
C12 C 0.2610(2) -0.02992(17) 0.43425(13) 0.0613(9) Uani 1 1 d . . . 
H12A H 0.2378 -0.0770 0.4287 0.092 Uiso 1 1 calc R . . 
H12B H 0.3110 -0.0347 0.4544 0.092 Uiso 1 1 calc R . . 
H12C H 0.2695 -0.0074 0.3968 0.092 Uiso 1 1 calc R . . 
C13 C 0.05125(14) 0.02112(13) 0.24837(11) 0.0339(6) Uani 1 1 d . . . 
C14 C -0.02689(15) 0.03366(15) 0.23242(14) 0.0470(7) Uani 1 1 d . . . 
C15 C -0.04232(19) 0.04385(16) 0.17436(16) 0.0566(9) Uani 1 1 d . . . 
C16 C 0.0154(2) 0.04026(15) 0.13313(14) 0.0545(8) Uani 1 1 d . . . 
C17 C 0.09162(18) 0.03029(15) 0.15068(12) 0.0450(7) Uani 1 1 d . . . 
C18 C 0.11147(14) 0.02116(13) 0.20827(11) 0.0344(6) Uani 1 1 d . . . 
C19 C -0.09059(17) 0.0352(2) 0.27726(17) 0.0774(12) Uani 1 1 d . . . 
H19A H -0.1383 0.0553 0.2605 0.116 Uiso 1 1 calc R . . 
H19B H -0.0738 0.0645 0.3098 0.116 Uiso 1 1 calc R . . 
H19C H -0.1011 -0.0133 0.2906 0.116 Uiso 1 1 calc R . . 
C20 C -0.0049(3) 0.0458(2) 0.07018(15) 0.0909(14) Uani 1 1 d . . . 
H20A H -0.0015 -0.0013 0.0524 0.136 Uiso 1 1 calc R . . 
H20B H 0.0318 0.0781 0.0512 0.136 Uiso 1 1 calc R . . 
H20C H -0.0582 0.0642 0.0661 0.136 Uiso 1 1 calc R . . 
C21 C 0.19517(17) 0.0119(2) 0.22651(15) 0.0498(8) Uani 1 1 d . . . 
C22 C 0.13462(13) 0.24713(13) 0.32498(10) 0.0289(5) Uani 1 1 d . . . 
C23 C 0.13170(17) 0.36773(14) 0.33373(12) 0.0409(6) Uani 1 1 d . . . 
C24 C 0.17006(17) 0.35290(15) 0.28556(13) 0.0422(7) Uani 1 1 d . . . 
C25 C 0.06040(14) 0.29670(13) 0.40762(10) 0.0312(6) Uani 1 1 d . . . 
C26 C 0.09195(15) 0.27488(13) 0.46000(11) 0.0347(6) Uani 1 1 d . . . 
C27 C 0.04095(16) 0.26939(15) 0.50645(12) 0.0396(7) Uani 1 1 d . . . 
C28 C -0.03852(16) 0.28382(15) 0.50191(12) 0.0450(7) Uani 1 1 d . . . 
C29 C -0.06635(17) 0.30705(16) 0.44921(13) 0.0453(7) Uani 1 1 d . . . 
C30 C -0.01846(15) 0.31434(14) 0.40146(12) 0.0391(6) Uani 1 1 d . . . 
C31 C 0.17723(16) 0.25719(19) 0.46607(14) 0.0418(7) Uani 1 1 d . . . 
C32 C -0.09280(19) 0.27331(19) 0.55275(14) 0.0636(9) Uani 1 1 d . . . 
H32A H -0.1293 0.3133 0.5551 0.095 Uiso 1 1 calc R . . 
H32B H -0.0620 0.2708 0.5882 0.095 Uiso 1 1 calc R . . 
H32C H -0.1221 0.2290 0.5478 0.095 Uiso 1 1 calc R . . 
C33 C -0.05018(19) 0.33970(18) 0.34450(14) 0.0485(7) Uani 1 1 d . . . 
C34 C 0.20431(14) 0.24332(14) 0.23096(10) 0.0331(6) Uani 1 1 d . . . 
C35 C 0.28512(15) 0.23617(14) 0.22702(11) 0.0377(6) Uani 1 1 d . . . 
C36 C 0.31472(17) 0.20267(15) 0.17854(12) 0.0429(7) Uani 1 1 d . . . 
C37 C 0.26718(16) 0.17675(15) 0.13512(11) 0.0409(7) Uani 1 1 d . . . 
C38 C 0.18709(16) 0.18586(15) 0.14040(12) 0.0392(6) Uani 1 1 d . . . 
C39 C 0.15384(15) 0.21862(14) 0.18829(11) 0.0351(6) Uani 1 1 d . . . 
C40 C 0.33847(19) 0.2639(2) 0.27358(14) 0.0503(8) Uani 1 1 d . . . 
C41 C 0.30113(18) 0.13915(17) 0.08365(13) 0.0563(8) Uani 1 1 d . . . 
H41A H 0.2596 0.1298 0.0556 0.084 Uiso 1 1 calc R . . 
H41B H 0.3245 0.0941 0.0959 0.084 Uiso 1 1 calc R . . 
H41C H 0.3413 0.1691 0.0660 0.084 Uiso 1 1 calc R . . 
C42 C 0.06606(15) 0.22663(17) 0.19325(12) 0.0489(7) Uani 1 1 d . . . 
H42A H 0.0531 0.2764 0.2009 0.073 Uiso 1 1 calc R . . 
H42B H 0.0468 0.1970 0.2248 0.073 Uiso 1 1 calc R . . 
H42C H 0.0414 0.2117 0.1572 0.073 Uiso 1 1 calc R . . 
H2 H 0.0848(18) -0.0996(18) 0.4150(14) 0.076(10) Uiso 1 1 d . . . 
H3 H 0.0437(16) -0.1030(17) 0.3077(12) 0.056(9) Uiso 1 1 d . . . 
H6 H 0.0709(14) 0.1266(14) 0.5581(10) 0.036(7) Uiso 1 1 d . . . 
H8 H 0.2769(16) 0.0314(14) 0.5377(11) 0.041(8) Uiso 1 1 d . . . 
H10A H 0.003(2) 0.125(2) 0.4330(15) 0.081(12) Uiso 1 1 d . . . 
H10B H -0.0271(18) 0.0515(18) 0.4485(12) 0.063(10) Uiso 1 1 d . . . 
H10C H -0.0303(17) 0.1178(17) 0.4948(14) 0.068(9) Uiso 1 1 d . . . 
H15 H 0.1561(14) 0.1701(13) 0.1097(11) 0.034(7) Uiso 1 1 d . . . 
H17 H 0.1371(18) 0.0277(17) 0.1207(13) 0.071(10) Uiso 1 1 d . . . 
H21A H 0.199(2) -0.033(2) 0.2449(16) 0.091(14) Uiso 1 1 d . . . 
H21B H 0.2120(18) 0.0482(19) 0.2508(14) 0.072(11) Uiso 1 1 d . . . 
H21C H 0.231(2) 0.0096(18) 0.1909(15) 0.083(11) Uiso 1 1 d . . . 
H23 H 0.1193(14) 0.4117(16) 0.3519(11) 0.045(8) Uiso 1 1 d . . . 
H24 H 0.1919(14) 0.3813(15) 0.2584(12) 0.043(8) Uiso 1 1 d . . . 
H27 H 0.0614(13) 0.2549(13) 0.5415(11) 0.033(7) Uiso 1 1 d . . . 
H29 H -0.1204(17) 0.3172(15) 0.4469(11) 0.051(8) Uiso 1 1 d . . . 
H31A H 0.1904(16) 0.2158(17) 0.4460(12) 0.053(9) Uiso 1 1 d . . . 
H31B H 0.1921(16) 0.2537(17) 0.5089(14) 0.067(9) Uiso 1 1 d . . . 
H31C H 0.2068(17) 0.2937(17) 0.4498(12) 0.056(9) Uiso 1 1 d . . . 
H33A H -0.0316(16) 0.3084(16) 0.3118(12) 0.052(8) Uiso 1 1 d . . . 
H33B H -0.1099(18) 0.3390(15) 0.3439(12) 0.058(9) Uiso 1 1 d . . . 
H33C H -0.0306(18) 0.3891(19) 0.3367(13) 0.070(10) Uiso 1 1 d . . . 
H36 H 0.3688(16) 0.1951(14) 0.1761(11) 0.045(8) Uiso 1 1 d . . . 
H38 H -0.0993(18) 0.0536(15) 0.1633(12) 0.057(8) Uiso 1 1 d . . . 
H40A H 0.3203(18) 0.2475(17) 0.3109(15) 0.069(10) Uiso 1 1 d . . . 
H40B H 0.345(2) 0.314(2) 0.2723(15) 0.086(13) Uiso 1 1 d . . . 
H40C H 0.3909(18) 0.2474(16) 0.2679(12) 0.057(9) Uiso 1 1 d . . . 
 
loop_ 
 _atom_site_aniso_label 
 _atom_site_aniso_U_11 
 _atom_site_aniso_U_22 
 _atom_site_aniso_U_33 
 _atom_site_aniso_U_23 
 _atom_site_aniso_U_13 
 _atom_site_aniso_U_12 
Ni1 0.03227(16) 0.02275(16) 0.02891(16) -0.00128(14) 0.00222(13) -0.00193(13) 
Cl1 0.0306(3) 0.0374(4) 0.0494(4) 0.0030(3) -0.0019(3) 0.0011(3) 
N1 0.0619(14) 0.0234(12) 0.0348(12) -0.0012(10) 0.0123(11) -0.0002(10) 
N2 0.0447(12) 0.0245(12) 0.0393(13) -0.0047(10) 0.0100(10) -0.0055(10) 
N3 0.0397(12) 0.0215(11) 0.0339(11) -0.0031(9) -0.0047(9) -0.0028(9) 
N4 0.0418(12) 0.0263(12) 0.0335(12) 0.0005(10) 0.0001(10) -0.0085(10) 
C1 0.0381(13) 0.0255(14) 0.0348(14) -0.0039(12) 0.0081(11) -0.0001(11) 
C2 0.089(2) 0.0224(16) 0.0493(19) -0.0001(14) 0.0203(17) -0.0051(15) 
C3 0.072(2) 0.0271(16) 0.051(2) -0.0097(15) 0.0173(16) -0.0124(14) 
C4 0.0601(17) 0.0252(14) 0.0343(14) 0.0046(12) 0.0112(13) 0.0008(13) 
C5 0.0556(17) 0.0272(15) 0.0367(15) 0.0025(12) 0.0129(13) -0.0031(12) 
C6 0.0599(18) 0.0304(16) 0.0385(16) 0.0008(13) 0.0148(14) 0.0030(13) 
C7 0.071(2) 0.0337(17) 0.0340(15) 0.0087(13) 0.0061(14) 0.0016(14) 
C8 0.060(2) 0.0449(19) 0.0466(19) 0.0129(15) 0.0013(16) 0.0131(15) 
C9 0.0668(19) 0.0345(17) 0.0356(16) 0.0112(13) 0.0125(14) 0.0140(14) 
C10 0.0504(18) 0.044(2) 0.048(2) -0.0077(17) 0.0122(15) -0.0044(15) 
C11 0.085(2) 0.052(2) 0.0422(18) 0.0058(15) -0.0015(16) 0.0048(17) 
C12 0.080(2) 0.052(2) 0.0517(19) 0.0068(16) 0.0156(17) 0.0284(18) 
C13 0.0343(14) 0.0253(14) 0.0421(16) -0.0093(12) 0.0036(11) -0.0049(11) 
C14 0.0319(15) 0.0369(17) 0.072(2) -0.0179(15) 0.0012(14) -0.0041(12) 
C15 0.0520(19) 0.0348(18) 0.083(3) -0.0117(16) -0.0306(18) -0.0007(14) 
C16 0.079(2) 0.0296(17) 0.0550(19) -0.0042(14) -0.0213(18) -0.0057(16) 
C17 0.0632(19) 0.0316(16) 0.0401(17) -0.0020(13) 0.0016(15) -0.0043(14) 
C18 0.0361(14) 0.0242(14) 0.0428(15) -0.0048(12) 0.0045(12) -0.0019(11) 
C19 0.0357(17) 0.079(3) 0.117(3) -0.032(2) 0.0205(19) -0.0075(17) 
C20 0.143(4) 0.064(3) 0.065(2) 0.005(2) -0.047(2) -0.013(2) 
C21 0.0377(16) 0.060(2) 0.051(2) -0.0092(19) 0.0073(15) 0.0075(15) 
C22 0.0300(12) 0.0273(13) 0.0294(13) -0.0004(10) -0.0031(10) -0.0038(11) 
C23 0.0538(16) 0.0216(14) 0.0474(16) -0.0022(13) -0.0060(14) -0.0051(12) 
C24 0.0548(17) 0.0276(15) 0.0442(17) 0.0053(14) -0.0032(14) -0.0113(13) 
C25 0.0369(14) 0.0240(13) 0.0329(14) -0.0056(11) 0.0000(11) -0.0015(10) 
C26 0.0416(14) 0.0257(14) 0.0369(15) -0.0066(12) -0.0012(12) -0.0004(11) 
C27 0.0505(17) 0.0366(17) 0.0319(15) -0.0057(13) -0.0027(13) 0.0017(13) 
C28 0.0448(16) 0.0414(17) 0.0488(18) -0.0155(14) 0.0089(13) -0.0023(13) 
C29 0.0347(16) 0.0416(18) 0.060(2) -0.0127(15) -0.0004(14) 0.0042(13) 
C30 0.0395(15) 0.0312(15) 0.0467(16) -0.0103(13) -0.0068(13) 0.0012(12) 
C31 0.0397(16) 0.048(2) 0.0381(17) -0.0022(16) -0.0052(13) 0.0018(14) 
C32 0.0566(19) 0.073(3) 0.061(2) -0.0094(18) 0.0209(16) 0.0025(17) 
C33 0.0466(17) 0.0420(19) 0.057(2) -0.0018(16) -0.0167(15) 0.0044(14) 
C34 0.0433(15) 0.0276(14) 0.0284(14) 0.0061(11) 0.0024(11) -0.0093(11) 
C35 0.0407(15) 0.0370(16) 0.0353(15) 0.0026(13) 0.0016(12) -0.0104(12) 
C36 0.0374(16) 0.0426(18) 0.0487(18) 0.0065(14) 0.0071(13) -0.0053(13) 
C37 0.0492(17) 0.0337(16) 0.0397(15) 0.0024(13) 0.0065(13) -0.0039(13) 
C38 0.0505(17) 0.0341(16) 0.0330(15) 0.0025(13) -0.0057(13) -0.0072(13) 
C39 0.0409(14) 0.0314(15) 0.0331(14) 0.0054(12) -0.0015(12) -0.0052(11) 
C40 0.0401(17) 0.067(3) 0.0438(19) -0.0007(17) -0.0011(14) -0.0181(17) 
C41 0.0645(19) 0.054(2) 0.0500(18) -0.0060(16) 0.0114(15) 0.0006(16) 
C42 0.0428(16) 0.059(2) 0.0450(17) -0.0024(15) -0.0075(13) -0.0026(14) 
 
_geom_special_details 
; 
 All esds (except the esd in the dihedral angle between two l.s. planes) 
 are estimated using the full covariance matrix.  The cell esds are taken 
 into account individually in the estimation of esds in distances, angles 
 and torsion angles; correlations between esds in cell parameters are only 
 used when they are defined by crystal symmetry.  An approximate (isotropic) 
 treatment of cell esds is used for estimating esds involving l.s. planes. 
; 
 
loop_ 
 _geom_bond_atom_site_label_1 
 _geom_bond_atom_site_label_2 
 _geom_bond_distance 
 _geom_bond_site_symmetry_2 
 _geom_bond_publ_flag 
Ni1 C1 1.911(2) . ? 
Ni1 C22 1.922(2) . ? 
Ni1 Cl1A 2.192(9) . ? 
Ni1 Cl1 2.2998(7) . ? 
N1 C1 1.369(3) . ? 
N1 C2 1.389(3) . ? 
N1 C4 1.444(3) . ? 
N2 C1 1.367(3) . ? 
N2 C3 1.390(3) . ? 
N2 C13 1.438(3) . ? 
N3 C22 1.365(3) . ? 
N3 C23 1.391(3) . ? 
N3 C25 1.444(3) . ? 
N4 C22 1.367(3) . ? 
N4 C24 1.387(3) . ? 
N4 C34 1.442(3) . ? 
C2 C3 1.334(4) . ? 
C2 H2 1.01(3) . ? 
C3 H3 0.93(3) . ? 
C4 C9 1.385(4) . ? 
C4 C5 1.401(4) . ? 
C5 C6 1.392(4) . ? 
C5 C10 1.499(4) . ? 
C6 C7 1.389(4) . ? 
C6 H6 0.96(3) . ? 
C7 C8 1.391(4) . ? 
C7 C11 1.504(4) . ? 
C8 C9 1.391(4) . ? 
C8 H8 0.90(3) . ? 
C9 C12 1.512(4) . ? 
C10 H10A 0.90(4) . ? 
C10 H10B 0.96(3) . ? 
C10 H10C 1.05(3) . ? 
C11 H11A 0.9800 . ? 
C11 H11B 0.9800 . ? 
C11 H11C 0.9800 . ? 
C12 H12A 0.9800 . ? 
C12 H12B 0.9800 . ? 
C12 H12C 0.9800 . ? 
C13 C18 1.390(3) . ? 
C13 C14 1.407(4) . ? 
C14 C15 1.389(4) . ? 
C14 C19 1.509(4) . ? 
C15 C16 1.379(5) . ? 
C15 H38 1.02(3) . ? 
C16 C17 1.379(4) . ? 
C16 C20 1.508(4) . ? 
C17 C18 1.393(4) . ? 
C17 H17 1.05(3) . ? 
C18 C21 1.504(4) . ? 
C19 H19A 0.9800 . ? 
C19 H19B 0.9800 . ? 
C19 H19C 0.9800 . ? 
C20 H20A 0.9800 . ? 
C20 H20B 0.9800 . ? 
C20 H20C 0.9800 . ? 
C21 H21A 0.95(4) . ? 
C21 H21B 0.93(3) . ? 
C21 H21C 1.03(3) . ? 
C23 C24 1.328(4) . ? 
C23 H23 0.95(3) . ? 
C24 H24 0.91(3) . ? 
C25 C26 1.394(3) . ? 
C25 C30 1.397(3) . ? 
C26 C27 1.393(4) . ? 
C26 C31 1.503(4) . ? 
C27 C28 1.391(4) . ? 
C27 H27 0.93(2) . ? 
C28 C29 1.386(4) . ? 
C28 C32 1.517(4) . ? 
C29 C30 1.387(4) . ? 
C29 H29 0.95(3) . ? 
C30 C33 1.509(4) . ? 
C31 H31A 0.94(3) . ? 
C31 H31B 1.03(3) . ? 
C31 H31C 0.93(3) . ? 
C32 H32A 0.9800 . ? 
C32 H32B 0.9800 . ? 
C32 H32C 0.9800 . ? 
C33 H33A 1.01(3) . ? 
C33 H33B 1.02(3) . ? 
C33 H33C 1.01(3) . ? 
C34 C35 1.392(3) . ? 
C34 C39 1.395(3) . ? 
C35 C36 1.388(4) . ? 
C35 C40 1.510(4) . ? 
C36 C37 1.386(4) . ? 
C36 H36 0.94(3) . ? 
C37 C38 1.386(4) . ? 
C37 C41 1.507(4) . ? 
C38 C39 1.395(4) . ? 
C38 H15 0.94(2) . ? 
C39 C42 1.514(4) . ? 
C40 H40A 0.97(3) . ? 
C40 H40B 0.95(4) . ? 
C40 H40C 0.96(3) . ? 
C41 H41A 0.9800 . ? 
C41 H41B 0.9800 . ? 
C41 H41C 0.9800 . ? 
C42 H42A 0.9800 . ? 
C42 H42B 0.9800 . ? 
C42 H42C 0.9800 . ? 
 
loop_ 
 _geom_angle_atom_site_label_1 
 _geom_angle_atom_site_label_2 
 _geom_angle_atom_site_label_3 
 _geom_angle 
 _geom_angle_site_symmetry_1 
 _geom_angle_site_symmetry_3 
 _geom_angle_publ_flag 
C1 Ni1 C22 166.47(10) . . ? 
C1 Ni1 Cl1A 83.8(3) . . ? 
C22 Ni1 Cl1A 82.7(3) . . ? 
C1 Ni1 Cl1 95.69(8) . . ? 
C22 Ni1 Cl1 97.81(7) . . ? 
Cl1A Ni1 Cl1 178.5(2) . . ? 
C1 N1 C2 112.0(2) . . ? 
C1 N1 C4 123.9(2) . . ? 
C2 N1 C4 124.1(2) . . ? 
C1 N2 C3 111.6(2) . . ? 
C1 N2 C13 125.6(2) . . ? 
C3 N2 C13 122.7(2) . . ? 
C22 N3 C23 111.8(2) . . ? 
C22 N3 C25 124.5(2) . . ? 
C23 N3 C25 123.4(2) . . ? 
C22 N4 C24 111.4(2) . . ? 
C22 N4 C34 124.9(2) . . ? 
C24 N4 C34 123.6(2) . . ? 
N2 C1 N1 102.8(2) . . ? 
N2 C1 Ni1 129.03(19) . . ? 
N1 C1 Ni1 127.93(18) . . ? 
C3 C2 N1 106.5(3) . . ? 
C3 C2 H2 131.6(19) . . ? 
N1 C2 H2 121.8(19) . . ? 
C2 C3 N2 107.1(3) . . ? 
C2 C3 H3 129.3(18) . . ? 
N2 C3 H3 123.5(19) . . ? 
C9 C4 C5 122.0(3) . . ? 
C9 C4 N1 119.6(2) . . ? 
C5 C4 N1 118.3(3) . . ? 
C6 C5 C4 117.3(3) . . ? 
C6 C5 C10 121.3(3) . . ? 
C4 C5 C10 121.5(3) . . ? 
C7 C6 C5 122.7(3) . . ? 
C7 C6 H6 120.9(14) . . ? 
C5 C6 H6 116.3(15) . . ? 
C6 C7 C8 117.5(3) . . ? 
C6 C7 C11 120.6(3) . . ? 
C8 C7 C11 121.9(3) . . ? 
C9 C8 C7 122.2(3) . . ? 
C9 C8 H8 121.9(17) . . ? 
C7 C8 H8 115.8(17) . . ? 
C4 C9 C8 118.2(3) . . ? 
C4 C9 C12 121.6(3) . . ? 
C8 C9 C12 120.2(3) . . ? 
C5 C10 H10A 111(2) . . ? 
C5 C10 H10B 111.7(19) . . ? 
H10A C10 H10B 110(3) . . ? 
C5 C10 H10C 108.3(16) . . ? 
H10A C10 H10C 105(3) . . ? 
H10B C10 H10C 111(2) . . ? 
C7 C11 H11A 109.5 . . ? 
C7 C11 H11B 109.5 . . ? 
H11A C11 H11B 109.5 . . ? 
C7 C11 H11C 109.5 . . ? 
H11A C11 H11C 109.5 . . ? 
H11B C11 H11C 109.5 . . ? 
C9 C12 H12A 109.5 . . ? 
C9 C12 H12B 109.5 . . ? 
H12A C12 H12B 109.5 . . ? 
C9 C12 H12C 109.5 . . ? 
H12A C12 H12C 109.5 . . ? 
H12B C12 H12C 109.5 . . ? 
C18 C13 C14 121.8(3) . . ? 
C18 C13 N2 118.9(2) . . ? 
C14 C13 N2 119.2(2) . . ? 
C15 C14 C13 117.4(3) . . ? 
C15 C14 C19 122.1(3) . . ? 
C13 C14 C19 120.5(3) . . ? 
C16 C15 C14 122.2(3) . . ? 
C16 C15 H38 121.0(16) . . ? 
C14 C15 H38 116.7(16) . . ? 
C17 C16 C15 118.6(3) . . ? 
C17 C16 C20 121.0(3) . . ? 
C15 C16 C20 120.4(3) . . ? 
C16 C17 C18 122.2(3) . . ? 
C16 C17 H17 120.7(17) . . ? 
C18 C17 H17 117.1(17) . . ? 
C13 C18 C17 117.7(2) . . ? 
C13 C18 C21 121.1(2) . . ? 
C17 C18 C21 121.2(2) . . ? 
C14 C19 H19A 109.5 . . ? 
C14 C19 H19B 109.5 . . ? 
H19A C19 H19B 109.5 . . ? 
C14 C19 H19C 109.5 . . ? 
H19A C19 H19C 109.5 . . ? 
H19B C19 H19C 109.5 . . ? 
C16 C20 H20A 109.5 . . ? 
C16 C20 H20B 109.5 . . ? 
H20A C20 H20B 109.5 . . ? 
C16 C20 H20C 109.5 . . ? 
H20A C20 H20C 109.5 . . ? 
H20B C20 H20C 109.5 . . ? 
C18 C21 H21A 107(2) . . ? 
C18 C21 H21B 112(2) . . ? 
H21A C21 H21B 111(3) . . ? 
C18 C21 H21C 110.0(18) . . ? 
H21A C21 H21C 106(3) . . ? 
H21B C21 H21C 110(3) . . ? 
N3 C22 N4 103.0(2) . . ? 
N3 C22 Ni1 130.84(17) . . ? 
N4 C22 Ni1 126.05(18) . . ? 
C24 C23 N3 106.6(2) . . ? 
C24 C23 H23 131.8(16) . . ? 
N3 C23 H23 121.6(16) . . ? 
C23 C24 N4 107.3(2) . . ? 
C23 C24 H24 131.7(18) . . ? 
N4 C24 H24 120.9(18) . . ? 
C26 C25 C30 122.3(2) . . ? 
C26 C25 N3 119.9(2) . . ? 
C30 C25 N3 117.8(2) . . ? 
C27 C26 C25 117.2(2) . . ? 
C27 C26 C31 121.3(2) . . ? 
C25 C26 C31 121.5(2) . . ? 
C28 C27 C26 122.6(3) . . ? 
C28 C27 H27 119.5(15) . . ? 
C26 C27 H27 117.9(15) . . ? 
C29 C28 C27 117.7(3) . . ? 
C29 C28 C32 121.4(3) . . ? 
C27 C28 C32 120.9(3) . . ? 
C28 C29 C30 122.5(3) . . ? 
C28 C29 H29 116.8(17) . . ? 
C30 C29 H29 120.8(17) . . ? 
C29 C30 C25 117.7(2) . . ? 
C29 C30 C33 121.5(3) . . ? 
C25 C30 C33 120.8(3) . . ? 
C26 C31 H31A 111.8(17) . . ? 
C26 C31 H31B 110.1(16) . . ? 
H31A C31 H31B 112(3) . . ? 
C26 C31 H31C 108.9(18) . . ? 
H31A C31 H31C 106(2) . . ? 
H31B C31 H31C 108(2) . . ? 
C28 C32 H32A 109.5 . . ? 
C28 C32 H32B 109.5 . . ? 
H32A C32 H32B 109.5 . . ? 
C28 C32 H32C 109.5 . . ? 
H32A C32 H32C 109.5 . . ? 
H32B C32 H32C 109.5 . . ? 
C30 C33 H33A 111.2(16) . . ? 
C30 C33 H33B 111.6(16) . . ? 
H33A C33 H33B 107(2) . . ? 
C30 C33 H33C 109.4(18) . . ? 
H33A C33 H33C 107(2) . . ? 
H33B C33 H33C 110(2) . . ? 
C35 C34 C39 122.4(2) . . ? 
C35 C34 N4 119.0(2) . . ? 
C39 C34 N4 118.6(2) . . ? 
C36 C35 C34 117.4(2) . . ? 
C36 C35 C40 121.3(3) . . ? 
C34 C35 C40 121.3(3) . . ? 
C37 C36 C35 122.6(3) . . ? 
C37 C36 H36 118.7(16) . . ? 
C35 C36 H36 118.6(16) . . ? 
C36 C37 C38 118.2(3) . . ? 
C36 C37 C41 121.2(3) . . ? 
C38 C37 C41 120.6(3) . . ? 
C37 C38 C39 121.9(3) . . ? 
C37 C38 H15 116.9(15) . . ? 
C39 C38 H15 121.2(15) . . ? 
C38 C39 C34 117.6(2) . . ? 
C38 C39 C42 120.6(2) . . ? 
C34 C39 C42 121.8(2) . . ? 
C35 C40 H40A 109.7(18) . . ? 
C35 C40 H40B 113(2) . . ? 
H40A C40 H40B 112(3) . . ? 
C35 C40 H40C 110.8(18) . . ? 
H40A C40 H40C 109(3) . . ? 
H40B C40 H40C 102(3) . . ? 
C37 C41 H41A 109.5 . . ? 
C37 C41 H41B 109.5 . . ? 
H41A C41 H41B 109.5 . . ? 
C37 C41 H41C 109.5 . . ? 
H41A C41 H41C 109.5 . . ? 
H41B C41 H41C 109.5 . . ? 
C39 C42 H42A 109.5 . . ? 
C39 C42 H42B 109.5 . . ? 
H42A C42 H42B 109.5 . . ? 
C39 C42 H42C 109.5 . . ? 
H42A C42 H42C 109.5 . . ? 
H42B C42 H42C 109.5 . . ? 
 
loop_ 
 _geom_torsion_atom_site_label_1 
 _geom_torsion_atom_site_label_2 
 _geom_torsion_atom_site_label_3 
 _geom_torsion_atom_site_label_4 
 _geom_torsion 
 _geom_torsion_site_symmetry_1 
 _geom_torsion_site_symmetry_2 
 _geom_torsion_site_symmetry_3 
 _geom_torsion_site_symmetry_4 
 _geom_torsion_publ_flag 
C3 N2 C1 N1 -0.5(3) . . . . ? 
C13 N2 C1 N1 -178.4(2) . . . . ? 
C3 N2 C1 Ni1 173.8(2) . . . . ? 
C13 N2 C1 Ni1 -4.2(4) . . . . ? 
C2 N1 C1 N2 0.6(3) . . . . ? 
C4 N1 C1 N2 -177.3(2) . . . . ? 
C2 N1 C1 Ni1 -173.7(2) . . . . ? 
C4 N1 C1 Ni1 8.4(4) . . . . ? 
C22 Ni1 C1 N2 64.2(5) . . . . ? 
Cl1A Ni1 C1 N2 66.7(3) . . . . ? 
Cl1 Ni1 C1 N2 -112.0(2) . . . . ? 
C22 Ni1 C1 N1 -123.0(4) . . . . ? 
Cl1A Ni1 C1 N1 -120.5(3) . . . . ? 
Cl1 Ni1 C1 N1 60.9(2) . . . . ? 
C1 N1 C2 C3 -0.5(3) . . . . ? 
C4 N1 C2 C3 177.4(3) . . . . ? 
N1 C2 C3 N2 0.2(3) . . . . ? 
C1 N2 C3 C2 0.2(3) . . . . ? 
C13 N2 C3 C2 178.1(2) . . . . ? 
C1 N1 C4 C9 -108.0(3) . . . . ? 
C2 N1 C4 C9 74.3(3) . . . . ? 
C1 N1 C4 C5 72.9(3) . . . . ? 
C2 N1 C4 C5 -104.8(3) . . . . ? 
C9 C4 C5 C6 0.4(4) . . . . ? 
N1 C4 C5 C6 179.5(2) . . . . ? 
C9 C4 C5 C10 -179.7(3) . . . . ? 
N1 C4 C5 C10 -0.7(4) . . . . ? 
C4 C5 C6 C7 2.0(4) . . . . ? 
C10 C5 C6 C7 -177.9(3) . . . . ? 
C5 C6 C7 C8 -2.8(4) . . . . ? 
C5 C6 C7 C11 177.2(3) . . . . ? 
C6 C7 C8 C9 1.3(4) . . . . ? 
C11 C7 C8 C9 -178.7(3) . . . . ? 
C5 C4 C9 C8 -1.8(4) . . . . ? 
N1 C4 C9 C8 179.1(2) . . . . ? 
C5 C4 C9 C12 179.2(3) . . . . ? 
N1 C4 C9 C12 0.2(4) . . . . ? 
C7 C8 C9 C4 1.0(4) . . . . ? 
C7 C8 C9 C12 179.9(3) . . . . ? 
C1 N2 C13 C18 82.8(3) . . . . ? 
C3 N2 C13 C18 -94.9(3) . . . . ? 
C1 N2 C13 C14 -100.7(3) . . . . ? 
C3 N2 C13 C14 81.6(3) . . . . ? 
C18 C13 C14 C15 2.1(4) . . . . ? 
N2 C13 C14 C15 -174.3(2) . . . . ? 
C18 C13 C14 C19 -178.4(3) . . . . ? 
N2 C13 C14 C19 5.2(4) . . . . ? 
C13 C14 C15 C16 1.6(4) . . . . ? 
C19 C14 C15 C16 -177.9(3) . . . . ? 
C14 C15 C16 C17 -3.8(5) . . . . ? 
C14 C15 C16 C20 175.0(3) . . . . ? 
C15 C16 C17 C18 2.4(4) . . . . ? 
C20 C16 C17 C18 -176.4(3) . . . . ? 
C14 C13 C18 C17 -3.4(4) . . . . ? 
N2 C13 C18 C17 173.0(2) . . . . ? 
C14 C13 C18 C21 176.4(3) . . . . ? 
N2 C13 C18 C21 -7.2(4) . . . . ? 
C16 C17 C18 C13 1.1(4) . . . . ? 
C16 C17 C18 C21 -178.7(3) . . . . ? 
C23 N3 C22 N4 -0.4(3) . . . . ? 
C25 N3 C22 N4 173.1(2) . . . . ? 
C23 N3 C22 Ni1 175.09(19) . . . . ? 
C25 N3 C22 Ni1 -11.5(3) . . . . ? 
C24 N4 C22 N3 0.6(3) . . . . ? 
C34 N4 C22 N3 -176.3(2) . . . . ? 
C24 N4 C22 Ni1 -175.16(18) . . . . ? 
C34 N4 C22 Ni1 8.0(3) . . . . ? 
C1 Ni1 C22 N3 74.3(5) . . . . ? 
Cl1A Ni1 C22 N3 71.8(3) . . . . ? 
Cl1 Ni1 C22 N3 -109.6(2) . . . . ? 
C1 Ni1 C22 N4 -111.2(4) . . . . ? 
Cl1A Ni1 C22 N4 -113.7(3) . . . . ? 
Cl1 Ni1 C22 N4 64.9(2) . . . . ? 
C22 N3 C23 C24 0.0(3) . . . . ? 
C25 N3 C23 C24 -173.5(2) . . . . ? 
N3 C23 C24 N4 0.4(3) . . . . ? 
C22 N4 C24 C23 -0.6(3) . . . . ? 
C34 N4 C24 C23 176.3(2) . . . . ? 
C22 N3 C25 C26 78.6(3) . . . . ? 
C23 N3 C25 C26 -108.7(3) . . . . ? 
C22 N3 C25 C30 -102.5(3) . . . . ? 
C23 N3 C25 C30 70.2(3) . . . . ? 
C30 C25 C26 C27 1.6(4) . . . . ? 
N3 C25 C26 C27 -179.6(2) . . . . ? 
C30 C25 C26 C31 -179.0(3) . . . . ? 
N3 C25 C26 C31 -0.2(4) . . . . ? 
C25 C26 C27 C28 0.8(4) . . . . ? 
C31 C26 C27 C28 -178.5(3) . . . . ? 
C26 C27 C28 C29 -2.4(4) . . . . ? 
C26 C27 C28 C32 176.6(3) . . . . ? 
C27 C28 C29 C30 1.7(4) . . . . ? 
C32 C28 C29 C30 -177.4(3) . . . . ? 
C28 C29 C30 C25 0.6(4) . . . . ? 
C28 C29 C30 C33 180.0(3) . . . . ? 
C26 C25 C30 C29 -2.3(4) . . . . ? 
N3 C25 C30 C29 178.9(2) . . . . ? 
C26 C25 C30 C33 178.3(3) . . . . ? 
N3 C25 C30 C33 -0.5(4) . . . . ? 
C22 N4 C34 C35 -105.2(3) . . . . ? 
C24 N4 C34 C35 78.3(3) . . . . ? 
C22 N4 C34 C39 76.8(3) . . . . ? 
C24 N4 C34 C39 -99.7(3) . . . . ? 
C39 C34 C35 C36 -0.4(4) . . . . ? 
N4 C34 C35 C36 -178.3(2) . . . . ? 
C39 C34 C35 C40 179.5(3) . . . . ? 
N4 C34 C35 C40 1.6(4) . . . . ? 
C34 C35 C36 C37 -0.1(4) . . . . ? 
C40 C35 C36 C37 -179.9(3) . . . . ? 
C35 C36 C37 C38 1.0(4) . . . . ? 
C35 C36 C37 C41 -178.6(3) . . . . ? 
C36 C37 C38 C39 -1.4(4) . . . . ? 
C41 C37 C38 C39 178.1(3) . . . . ? 
C37 C38 C39 C34 1.0(4) . . . . ? 
C37 C38 C39 C42 -178.9(3) . . . . ? 
C35 C34 C39 C38 -0.1(4) . . . . ? 
N4 C34 C39 C38 177.8(2) . . . . ? 
C35 C34 C39 C42 179.8(3) . . . . ? 
N4 C34 C39 C42 -2.2(4) . . . . ? 
 
_diffrn_measured_fraction_theta_max    0.991 
_diffrn_reflns_theta_full              27.84 
_diffrn_measured_fraction_theta_full   0.991 
_refine_diff_density_max    0.330 
_refine_diff_density_min   -0.337 
_refine_diff_density_rms    0.054 

#===END

data_Ni(I)IMes2Br 
 
_audit_creation_method            SHELXL-97 
_chemical_name_systematic 
; 
 ? 
; 
_chemical_name_common             ? 
_chemical_melting_point           ? 
_chemical_formula_moiety          'C42 H48 Br N4 Ni'
_chemical_formula_sum 
 'C42 H48 Br N4 Ni' 
_chemical_formula_weight          747.46 
 
loop_ 
 _atom_type_symbol 
 _atom_type_description 
 _atom_type_scat_dispersion_real 
 _atom_type_scat_dispersion_imag 
 _atom_type_scat_source 
 'C'  'C'   0.0033   0.0016 
 'International Tables Vol C Tables 4.2.6.8 and 6.1.1.4' 
 'H'  'H'   0.0000   0.0000 
 'International Tables Vol C Tables 4.2.6.8 and 6.1.1.4' 
 'N'  'N'   0.0061   0.0033 
 'International Tables Vol C Tables 4.2.6.8 and 6.1.1.4' 
 'Br'  'Br'  -0.2901   2.4595 
 'International Tables Vol C Tables 4.2.6.8 and 6.1.1.4' 
 'Ni'  'Ni'   0.3393   1.1124 
 'International Tables Vol C Tables 4.2.6.8 and 6.1.1.4' 
 
_symmetry_cell_setting            orthorhombic 
_symmetry_space_group_name_H-M    Pbca
 
loop_ 
 _symmetry_equiv_pos_as_xyz 
 'x, y, z' 
 '-x+1/2, -y, z+1/2' 
 'x+1/2, -y+1/2, -z' 
 '-x, y+1/2, -z+1/2' 
 '-x, -y, -z' 
 'x-1/2, y, -z-1/2' 
 '-x-1/2, y-1/2, z' 
 'x, -y-1/2, z-1/2' 
 
_cell_length_a                    17.2771(3) 
_cell_length_b                    18.7820(3) 
_cell_length_c                    23.4238(5) 
_cell_angle_alpha                 90.00 
_cell_angle_beta                  90.00 
_cell_angle_gamma                 90.00 
_cell_volume                      7601.0(2) 
_cell_formula_units_Z             8 
_cell_measurement_temperature     150(1) 
_cell_measurement_reflns_used     42870 
_cell_measurement_theta_min       1.018
_cell_measurement_theta_max       27.485
 
_exptl_crystal_description        prism
_exptl_crystal_colour             yellow
_exptl_crystal_size_max           0.33 
_exptl_crystal_size_mid           0.25 
_exptl_crystal_size_min           0.15 
_exptl_crystal_density_meas       ? 
_exptl_crystal_density_diffrn     1.306 
_exptl_crystal_density_method     'not measured' 
_exptl_crystal_F_000              3128 
_exptl_absorpt_coefficient_mu     1.596 
_exptl_absorpt_correction_type    Multi-scan 
_exptl_absorpt_correction_T_min   0.6210 
_exptl_absorpt_correction_T_max   0.7958 
_exptl_absorpt_process_details    'DENZO-SMN (Otwinowski & Minor, 1997)' 
 
_exptl_special_details 
; 
  The program Denzo-SMN (Otwinowski & Minor, 1997) uses a scaling
 algorithm (Fox & Holmes, 1966) which effectively corrects for
 absorption effects. High redundancy data were used in the scaling
 program hence the 'multi-scan' code word was used. No transmission
 coefficients are available from the program (only scale factors for each
 frame). The scale factors in the experimental table are calculated
 from the 'size' command in the SHELXL-97 input file. 
; 
 
_diffrn_ambient_temperature       150(1) 
_diffrn_radiation_wavelength      0.71073 
_diffrn_radiation_type            MoK\a 
_diffrn_radiation_source          'fine-focus sealed tube' 
_diffrn_radiation_monochromator   graphite 
_diffrn_measurement_device_type   'Nonius KappaCCD Diffractometer'
_diffrn_measurement_method        'Phi and Omega scan'
_diffrn_detector_area_resol_mean  ? 
_diffrn_standards_number          ? 
_diffrn_standards_interval_count  ? 
_diffrn_standards_interval_time   ? 
_diffrn_standards_decay_%         ? 
_diffrn_reflns_number             15796 
_diffrn_reflns_av_R_equivalents   0.0584 
_diffrn_reflns_av_sigmaI/netI     0.0776 
_diffrn_reflns_limit_h_min        -22 
_diffrn_reflns_limit_h_max        22 
_diffrn_reflns_limit_k_min        -24 
_diffrn_reflns_limit_k_max        24 
_diffrn_reflns_limit_l_min        -30 
_diffrn_reflns_limit_l_max        30 
_diffrn_reflns_theta_min          2.36 
_diffrn_reflns_theta_max          27.48 
_reflns_number_total              8690 
_reflns_number_gt                 4844 
_reflns_threshold_expression      >2sigma(I) 
 
_computing_data_collection        'Nonius COLLECT' 
_computing_cell_refinement        DENZO-SMN
_computing_data_reduction         DENZO-SMN
_computing_structure_solution     SIR97 
_computing_structure_refinement   'SHELXL-97 (Sheldrick, 1997)' 
_computing_molecular_graphics     'WinGX, Ortep3' 
_computing_publication_material   ? 
 
_refine_special_details 
; 
 Refinement of F^2^ against ALL reflections.  The weighted R-factor wR and 
 goodness of fit S are based on F^2^, conventional R-factors R are based 
 on F, with F set to zero for negative F^2^. The threshold expression of 
 F^2^ > 2sigma(F^2^) is used only for calculating R-factors(gt) etc. and is 
 not relevant to the choice of reflections for refinement.  R-factors based 
 on F^2^ are statistically about twice as large as those based on F, and R- 
 factors based on ALL data will be even larger. 
; 
 
_refine_ls_structure_factor_coef  Fsqd  
_refine_ls_matrix_type            full 
_refine_ls_weighting_scheme       calc  
_refine_ls_weighting_details 
 'calc w=1/[\s^2^(Fo^2^)+(0.0727P)^2^+3.7745P] where P=(Fo^2^+2Fc^2^)/3' 
_atom_sites_solution_primary      direct 
_atom_sites_solution_secondary    difmap 
_atom_sites_solution_hydrogens    geom 
_refine_ls_hydrogen_treatment     mixed 
_refine_ls_extinction_method      SHELXL 
_refine_ls_extinction_coef        0.00163(18) 
_refine_ls_extinction_expression 
 'Fc^*^=kFc[1+0.001xFc^2^\l^3^/sin(2\q)]^-1/4^' 
_refine_ls_number_reflns          8690 
_refine_ls_number_parameters      494 
_refine_ls_number_restraints      0 
_refine_ls_R_factor_all           0.1301 
_refine_ls_R_factor_gt            0.0594 
_refine_ls_wR_factor_ref          0.1595 
_refine_ls_wR_factor_gt           0.1300 
_refine_ls_goodness_of_fit_ref    1.020 
_refine_ls_restrained_S_all       1.020 
_refine_ls_shift/su_max           0.001 
_refine_ls_shift/su_mean          0.000 
 
loop_ 
 _atom_site_label 
 _atom_site_type_symbol 
 _atom_site_fract_x 
 _atom_site_fract_y 
 _atom_site_fract_z 
 _atom_site_U_iso_or_equiv 
 _atom_site_adp_type 
 _atom_site_occupancy 
 _atom_site_symmetry_multiplicity 
 _atom_site_calc_flag 
 _atom_site_refinement_flags 
 _atom_site_disorder_assembly 
 _atom_site_disorder_group 
Ni1 Ni 0.12596(3) 0.35336(2) 0.66187(2) 0.04127(17) Uani 1 1 d . . . 
Br1 Br 0.26394(2) 0.37396(2) 0.64623(2) 0.05815(18) Uani 1 1 d . . . 
N1 N 0.1019(2) 0.49263(16) 0.60543(14) 0.0525(9) Uani 1 1 d . . . 
N2 N 0.06855(18) 0.49695(16) 0.69328(14) 0.0482(8) Uani 1 1 d . . . 
N3 N 0.10854(18) 0.19642(16) 0.64142(14) 0.0457(8) Uani 1 1 d . . . 
N4 N 0.16771(19) 0.21917(17) 0.71960(14) 0.0486(8) Uani 1 1 d . . . 
C1 C 0.0952(2) 0.4506(2) 0.65296(16) 0.0449(9) Uani 1 1 d . . . 
C2 C 0.0803(3) 0.5623(2) 0.6166(2) 0.0651(13) Uani 1 1 d . . . 
C3 C 0.0592(3) 0.5653(2) 0.6713(2) 0.0627(12) Uani 1 1 d . . . 
C4 C 0.1262(3) 0.4675(2) 0.55031(17) 0.0533(10) Uani 1 1 d . . . 
C5 C 0.0753(3) 0.4246(2) 0.51883(18) 0.0537(11) Uani 1 1 d . . . 
C6 C 0.1009(3) 0.4009(2) 0.4657(2) 0.0584(11) Uani 1 1 d . . . 
C7 C 0.1730(3) 0.4165(2) 0.44410(18) 0.0621(12) Uani 1 1 d . . . 
C8 C 0.2212(3) 0.4600(3) 0.4769(2) 0.0671(13) Uani 1 1 d . . . 
C9 C 0.1991(3) 0.4867(2) 0.52949(18) 0.0585(11) Uani 1 1 d . . . 
C10 C -0.0027(2) 0.4048(2) 0.54169(19) 0.0598(11) Uani 1 1 d . . . 
H10A H -0.0342 0.3845 0.5109 0.090 Uiso 1 1 calc R . . 
H10B H -0.0283 0.4473 0.5569 0.090 Uiso 1 1 calc R . . 
H10C H 0.0033 0.3696 0.5722 0.090 Uiso 1 1 calc R . . 
C11 C 0.1997(3) 0.3872(3) 0.3877(2) 0.0815(16) Uani 1 1 d . . . 
H11A H 0.2139 0.3370 0.3922 0.122 Uiso 1 1 calc R . . 
H11B H 0.2448 0.4143 0.3744 0.122 Uiso 1 1 calc R . . 
H11C H 0.1578 0.3914 0.3597 0.122 Uiso 1 1 calc R . . 
C12 C 0.2527(3) 0.5341(3) 0.5632(2) 0.0778(15) Uani 1 1 d . . . 
H12A H 0.3045 0.5328 0.5462 0.117 Uiso 1 1 calc R . . 
H12B H 0.2553 0.5174 0.6028 0.117 Uiso 1 1 calc R . . 
H12C H 0.2331 0.5831 0.5625 0.117 Uiso 1 1 calc R . . 
C13 C 0.0529(2) 0.4804(2) 0.75209(17) 0.0469(10) Uani 1 1 d . . . 
C14 C -0.0231(2) 0.4661(2) 0.7690(2) 0.0574(11) Uani 1 1 d . . . 
C15 C -0.0379(3) 0.4572(2) 0.8272(2) 0.0663(13) Uani 1 1 d . . . 
C16 C 0.0206(3) 0.4631(2) 0.8673(2) 0.0642(12) Uani 1 1 d . . . 
C17 C 0.0956(3) 0.4741(2) 0.8483(2) 0.0564(11) Uani 1 1 d . . . 
C18 C 0.1137(2) 0.4822(2) 0.79120(18) 0.0469(9) Uani 1 1 d . . . 
C19 C -0.0873(3) 0.4611(3) 0.7253(2) 0.0856(17) Uani 1 1 d . . . 
H19A H -0.0979 0.5085 0.7097 0.128 Uiso 1 1 calc R . . 
H19B H -0.1342 0.4425 0.7435 0.128 Uiso 1 1 calc R . . 
H19C H -0.0715 0.4291 0.6944 0.128 Uiso 1 1 calc R . . 
C20 C 0.0028(4) 0.4589(3) 0.9303(2) 0.0957(18) Uani 1 1 d . . . 
H20A H 0.0082 0.5062 0.9475 0.143 Uiso 1 1 calc R . . 
H20B H 0.0389 0.4259 0.9487 0.143 Uiso 1 1 calc R . . 
H20C H -0.0503 0.4418 0.9357 0.143 Uiso 1 1 calc R . . 
C21 C 0.1958(2) 0.4936(3) 0.77181(19) 0.0617(12) Uani 1 1 d . . . 
H21A H 0.2300 0.4960 0.8052 0.093 Uiso 1 1 calc R . . 
H21B H 0.1992 0.5384 0.7504 0.093 Uiso 1 1 calc R . . 
H21C H 0.2117 0.4540 0.7472 0.093 Uiso 1 1 calc R . . 
C22 C 0.1314(2) 0.2521(2) 0.67483(16) 0.0424(9) Uani 1 1 d . . . 
C23 C 0.1300(3) 0.1315(2) 0.6652(2) 0.0553(11) Uani 1 1 d . . . 
C24 C 0.1670(3) 0.1452(2) 0.7132(2) 0.0579(11) Uani 1 1 d . . . 
C25 C 0.0600(2) 0.2030(2) 0.59197(17) 0.0479(10) Uani 1 1 d . . . 
C26 C 0.0918(2) 0.2234(2) 0.54001(18) 0.0492(10) Uani 1 1 d . . . 
C27 C 0.0413(3) 0.2285(2) 0.4934(2) 0.0575(11) Uani 1 1 d . . . 
C28 C -0.0370(3) 0.2152(2) 0.4978(2) 0.0622(12) Uani 1 1 d . . . 
C29 C -0.0656(3) 0.1936(3) 0.5501(2) 0.0627(13) Uani 1 1 d . . . 
C30 C -0.0190(2) 0.1863(2) 0.5979(2) 0.0536(11) Uani 1 1 d . . . 
C31 C 0.1765(2) 0.2410(2) 0.53392(19) 0.0567(11) Uani 1 1 d . . . 
H31A H 0.1871 0.2869 0.5523 0.085 Uiso 1 1 calc R . . 
H31B H 0.1899 0.2439 0.4933 0.085 Uiso 1 1 calc R . . 
H31C H 0.2075 0.2038 0.5522 0.085 Uiso 1 1 calc R . . 
C32 C -0.0908(3) 0.2255(3) 0.4470(2) 0.0863(17) Uani 1 1 d . . . 
H32A H -0.1189 0.1811 0.4396 0.129 Uiso 1 1 calc R . . 
H32B H -0.0603 0.2384 0.4133 0.129 Uiso 1 1 calc R . . 
H32C H -0.1278 0.2636 0.4555 0.129 Uiso 1 1 calc R . . 
C33 C -0.0500(3) 0.1623(3) 0.6546(2) 0.0670(13) Uani 1 1 d . . . 
H33A H -0.1067 0.1612 0.6531 0.100 Uiso 1 1 calc R . . 
H33B H -0.0333 0.1955 0.6844 0.100 Uiso 1 1 calc R . . 
H33C H -0.0304 0.1146 0.6632 0.100 Uiso 1 1 calc R . . 
C34 C 0.2005(2) 0.2550(2) 0.76800(17) 0.0475(10) Uani 1 1 d . . . 
C35 C 0.2801(2) 0.2604(2) 0.77301(19) 0.0537(11) Uani 1 1 d . . . 
C36 C 0.3107(3) 0.2947(2) 0.8203(2) 0.0574(11) Uani 1 1 d . . . 
C37 C 0.2632(3) 0.3225(2) 0.86285(18) 0.0569(11) Uani 1 1 d . . . 
C38 C 0.1835(3) 0.3152(2) 0.85727(19) 0.0538(11) Uani 1 1 d . . . 
C39 C 0.1508(2) 0.2819(2) 0.81003(18) 0.0506(10) Uani 1 1 d . . . 
C40 C 0.3333(3) 0.2295(3) 0.72837(19) 0.0655(12) Uani 1 1 d . . . 
H40A H 0.3378 0.1780 0.7341 0.098 Uiso 1 1 calc R . . 
H40B H 0.3845 0.2515 0.7317 0.098 Uiso 1 1 calc R . . 
H40C H 0.3120 0.2389 0.6903 0.098 Uiso 1 1 calc R . . 
C41 C 0.2970(3) 0.3611(2) 0.9137(2) 0.0722(14) Uani 1 1 d . . . 
H41A H 0.2556 0.3726 0.9408 0.108 Uiso 1 1 calc R . . 
H41B H 0.3221 0.4051 0.9009 0.108 Uiso 1 1 calc R . . 
H41C H 0.3354 0.3305 0.9324 0.108 Uiso 1 1 calc R . . 
C42 C 0.0637(2) 0.2750(3) 0.8040(2) 0.0644(12) Uani 1 1 d . . . 
H42A H 0.0388 0.2894 0.8398 0.097 Uiso 1 1 calc R . . 
H42B H 0.0504 0.2254 0.7956 0.097 Uiso 1 1 calc R . . 
H42C H 0.0457 0.3056 0.7729 0.097 Uiso 1 1 calc R . . 
H2 H 0.092(3) 0.599(3) 0.586(2) 0.099(17) Uiso 1 1 d . . . 
H3 H 0.038(2) 0.605(3) 0.691(2) 0.072(14) Uiso 1 1 d . . . 
H6 H 0.068(2) 0.369(2) 0.4427(18) 0.058(12) Uiso 1 1 d . . . 
H8 H 0.272(2) 0.469(2) 0.4608(17) 0.052(11) Uiso 1 1 d . . . 
H15 H -0.099(3) 0.443(3) 0.8419(19) 0.094(16) Uiso 1 1 d . . . 
H17 H 0.135(2) 0.480(2) 0.8741(17) 0.052(12) Uiso 1 1 d . . . 
H23 H 0.121(2) 0.092(2) 0.6477(16) 0.047(12) Uiso 1 1 d . . . 
H24 H 0.190(2) 0.113(2) 0.743(2) 0.072(14) Uiso 1 1 d . . . 
H27 H 0.060(2) 0.2429(18) 0.4577(15) 0.036(10) Uiso 1 1 d . . . 
H29 H -0.112(3) 0.183(2) 0.5530(18) 0.062(14) Uiso 1 1 d . . . 
H36 H 0.367(2) 0.304(2) 0.8222(17) 0.056(12) Uiso 1 1 d . . . 
H38 H 0.152(3) 0.336(3) 0.887(2) 0.089(16) Uiso 1 1 d . . . 
 
loop_ 
 _atom_site_aniso_label 
 _atom_site_aniso_U_11 
 _atom_site_aniso_U_22 
 _atom_site_aniso_U_33 
 _atom_site_aniso_U_23 
 _atom_site_aniso_U_13 
 _atom_site_aniso_U_12 
Ni1 0.0418(3) 0.0350(3) 0.0470(3) -0.0025(2) -0.0009(2) 0.0014(2) 
Br1 0.0454(3) 0.0595(3) 0.0695(3) -0.0014(2) 0.0045(2) -0.00203(19) 
N1 0.070(2) 0.0347(19) 0.053(2) -0.0008(16) -0.0096(17) -0.0009(16) 
N2 0.0521(19) 0.0363(18) 0.056(2) -0.0037(16) -0.0074(16) 0.0043(14) 
N3 0.0481(18) 0.0343(18) 0.055(2) -0.0033(15) 0.0022(16) 0.0047(14) 
N4 0.0541(19) 0.0398(19) 0.052(2) -0.0012(16) 0.0035(16) 0.0076(15) 
C1 0.047(2) 0.038(2) 0.050(2) -0.0002(18) -0.0063(18) -0.0018(17) 
C2 0.090(3) 0.036(3) 0.069(3) 0.003(2) -0.013(3) 0.000(2) 
C3 0.081(3) 0.040(3) 0.068(3) -0.005(2) -0.016(3) 0.008(2) 
C4 0.073(3) 0.041(2) 0.046(2) 0.0048(19) -0.009(2) -0.002(2) 
C5 0.069(3) 0.038(2) 0.054(3) 0.000(2) -0.013(2) 0.002(2) 
C6 0.077(3) 0.041(2) 0.057(3) 0.002(2) -0.015(3) -0.004(2) 
C7 0.092(3) 0.047(3) 0.048(3) 0.007(2) -0.006(2) -0.007(2) 
C8 0.082(3) 0.056(3) 0.064(3) 0.013(2) 0.011(3) -0.015(3) 
C9 0.080(3) 0.046(2) 0.050(3) 0.006(2) -0.008(2) -0.016(2) 
C10 0.061(3) 0.057(3) 0.062(3) -0.008(2) -0.014(2) 0.000(2) 
C11 0.115(4) 0.071(3) 0.058(3) 0.004(3) 0.008(3) -0.005(3) 
C12 0.099(4) 0.070(3) 0.065(3) 0.013(3) -0.008(3) -0.039(3) 
C13 0.050(2) 0.039(2) 0.052(3) -0.0099(18) -0.0012(19) 0.0044(17) 
C14 0.046(2) 0.044(2) 0.082(3) -0.014(2) 0.000(2) 0.0041(19) 
C15 0.065(3) 0.050(3) 0.084(4) -0.013(2) 0.027(3) -0.001(2) 
C16 0.081(3) 0.043(3) 0.068(3) -0.004(2) 0.014(3) 0.000(2) 
C17 0.065(3) 0.046(3) 0.057(3) -0.006(2) -0.007(2) 0.005(2) 
C18 0.049(2) 0.039(2) 0.053(2) -0.0048(18) -0.0030(19) 0.0023(17) 
C19 0.048(3) 0.088(4) 0.120(5) -0.025(3) -0.013(3) 0.001(3) 
C20 0.134(5) 0.077(4) 0.076(4) -0.007(3) 0.032(4) -0.002(3) 
C21 0.051(3) 0.072(3) 0.062(3) -0.006(2) -0.009(2) -0.007(2) 
C22 0.044(2) 0.037(2) 0.046(2) -0.0008(17) 0.0043(18) 0.0003(17) 
C23 0.068(3) 0.033(2) 0.065(3) -0.003(2) 0.005(2) 0.002(2) 
C24 0.069(3) 0.036(2) 0.069(3) 0.005(2) 0.000(3) 0.012(2) 
C25 0.052(2) 0.036(2) 0.056(3) -0.0098(19) 0.003(2) 0.0006(18) 
C26 0.047(2) 0.041(2) 0.060(3) -0.0118(19) 0.003(2) -0.0003(18) 
C27 0.067(3) 0.049(3) 0.056(3) -0.008(2) 0.000(2) 0.000(2) 
C28 0.062(3) 0.052(3) 0.073(3) -0.015(2) -0.018(3) 0.001(2) 
C29 0.046(3) 0.058(3) 0.084(4) -0.016(3) -0.002(3) -0.007(2) 
C30 0.047(2) 0.040(2) 0.074(3) -0.012(2) 0.005(2) -0.0031(18) 
C31 0.056(2) 0.053(3) 0.062(3) -0.002(2) 0.007(2) 0.000(2) 
C32 0.083(4) 0.088(4) 0.088(4) -0.016(3) -0.031(3) -0.003(3) 
C33 0.055(3) 0.060(3) 0.086(4) -0.006(3) 0.018(2) 0.000(2) 
C34 0.056(2) 0.037(2) 0.049(2) 0.0033(18) -0.002(2) 0.0106(18) 
C35 0.056(2) 0.048(3) 0.057(3) 0.005(2) -0.001(2) 0.014(2) 
C36 0.052(3) 0.054(3) 0.067(3) 0.005(2) -0.004(2) 0.006(2) 
C37 0.068(3) 0.045(3) 0.058(3) 0.004(2) -0.009(2) 0.002(2) 
C38 0.068(3) 0.043(2) 0.050(3) 0.000(2) 0.004(2) 0.004(2) 
C39 0.057(2) 0.041(2) 0.054(3) 0.0064(19) 0.003(2) 0.0052(19) 
C40 0.060(3) 0.074(3) 0.062(3) -0.005(2) -0.007(2) 0.018(2) 
C41 0.081(3) 0.067(3) 0.069(3) -0.005(2) -0.014(3) -0.002(3) 
C42 0.060(3) 0.071(3) 0.062(3) -0.008(2) 0.011(2) 0.002(2) 
 
_geom_special_details 
; 
 All esds (except the esd in the dihedral angle between two l.s. planes) 
 are estimated using the full covariance matrix.  The cell esds are taken 
 into account individually in the estimation of esds in distances, angles 
 and torsion angles; correlations between esds in cell parameters are only 
 used when they are defined by crystal symmetry.  An approximate (isotropic) 
 treatment of cell esds is used for estimating esds involving l.s. planes. 
; 
 
loop_ 
 _geom_bond_atom_site_label_1 
 _geom_bond_atom_site_label_2 
 _geom_bond_distance 
 _geom_bond_site_symmetry_2 
 _geom_bond_publ_flag 
Ni1 C1 1.913(4) . ? 
Ni1 C22 1.929(4) . ? 
Ni1 Br1 2.4428(6) . ? 
N1 C1 1.370(5) . ? 
N1 C2 1.386(5) . ? 
N1 C4 1.438(5) . ? 
N2 C1 1.365(5) . ? 
N2 C3 1.392(5) . ? 
N2 C13 1.438(5) . ? 
N3 C22 1.364(5) . ? 
N3 C23 1.392(5) . ? 
N3 C25 1.435(5) . ? 
N4 C22 1.369(5) . ? 
N4 C24 1.398(5) . ? 
N4 C34 1.435(5) . ? 
C2 C3 1.332(7) . ? 
C2 H2 1.01(6) . ? 
C3 H3 0.95(5) . ? 
C4 C9 1.398(6) . ? 
C4 C5 1.402(6) . ? 
C5 C6 1.394(6) . ? 
C5 C10 1.496(6) . ? 
C6 C7 1.377(6) . ? 
C6 H6 0.98(4) . ? 
C7 C8 1.397(6) . ? 
C7 C11 1.503(6) . ? 
C8 C9 1.384(6) . ? 
C8 H8 0.97(4) . ? 
C9 C12 1.508(6) . ? 
C10 H10A 0.9800 . ? 
C10 H10B 0.9800 . ? 
C10 H10C 0.9800 . ? 
C11 H11A 0.9800 . ? 
C11 H11B 0.9800 . ? 
C11 H11C 0.9800 . ? 
C12 H12A 0.9800 . ? 
C12 H12B 0.9800 . ? 
C12 H12C 0.9800 . ? 
C13 C18 1.395(5) . ? 
C13 C14 1.399(6) . ? 
C14 C15 1.397(7) . ? 
C14 C19 1.511(6) . ? 
C15 C16 1.383(7) . ? 
C15 H15 1.14(5) . ? 
C16 C17 1.385(7) . ? 
C16 C20 1.512(6) . ? 
C17 C18 1.381(6) . ? 
C17 H17 0.92(4) . ? 
C18 C21 1.504(5) . ? 
C19 H19A 0.9800 . ? 
C19 H19B 0.9800 . ? 
C19 H19C 0.9800 . ? 
C20 H20A 0.9800 . ? 
C20 H20B 0.9800 . ? 
C20 H20C 0.9800 . ? 
C21 H21A 0.9800 . ? 
C21 H21B 0.9800 . ? 
C21 H21C 0.9800 . ? 
C23 C24 1.318(7) . ? 
C23 H23 0.86(4) . ? 
C24 H24 1.00(5) . ? 
C25 C26 1.389(6) . ? 
C25 C30 1.407(5) . ? 
C26 C27 1.401(6) . ? 
C26 C31 1.507(6) . ? 
C27 C28 1.380(6) . ? 
C27 H27 0.94(3) . ? 
C28 C29 1.382(7) . ? 
C28 C32 1.522(6) . ? 
C29 C30 1.386(6) . ? 
C29 H29 0.83(4) . ? 
C30 C33 1.502(6) . ? 
C31 H31A 0.9800 . ? 
C31 H31B 0.9800 . ? 
C31 H31C 0.9800 . ? 
C32 H32A 0.9800 . ? 
C32 H32B 0.9800 . ? 
C32 H32C 0.9800 . ? 
C33 H33A 0.9800 . ? 
C33 H33B 0.9800 . ? 
C33 H33C 0.9800 . ? 
C34 C35 1.385(6) . ? 
C34 C39 1.400(6) . ? 
C35 C36 1.386(6) . ? 
C35 C40 1.508(6) . ? 
C36 C37 1.393(6) . ? 
C36 H36 0.99(4) . ? 
C37 C38 1.390(6) . ? 
C37 C41 1.512(6) . ? 
C38 C39 1.391(6) . ? 
C38 H38 0.96(5) . ? 
C39 C42 1.517(6) . ? 
C40 H40A 0.9800 . ? 
C40 H40B 0.9800 . ? 
C40 H40C 0.9800 . ? 
C41 H41A 0.9800 . ? 
C41 H41B 0.9800 . ? 
C41 H41C 0.9800 . ? 
C42 H42A 0.9800 . ? 
C42 H42B 0.9800 . ? 
C42 H42C 0.9800 . ? 
 
loop_ 
 _geom_angle_atom_site_label_1 
 _geom_angle_atom_site_label_2 
 _geom_angle_atom_site_label_3 
 _geom_angle 
 _geom_angle_site_symmetry_1 
 _geom_angle_site_symmetry_3 
 _geom_angle_publ_flag 
C1 Ni1 C22 166.46(16) . . ? 
C1 Ni1 Br1 95.94(12) . . ? 
C22 Ni1 Br1 97.58(11) . . ? 
C1 N1 C2 111.6(4) . . ? 
C1 N1 C4 124.4(3) . . ? 
C2 N1 C4 124.0(4) . . ? 
C1 N2 C3 111.8(4) . . ? 
C1 N2 C13 126.0(3) . . ? 
C3 N2 C13 122.2(4) . . ? 
C22 N3 C23 111.4(4) . . ? 
C22 N3 C25 124.5(3) . . ? 
C23 N3 C25 123.7(3) . . ? 
C22 N4 C24 111.2(3) . . ? 
C22 N4 C34 125.0(3) . . ? 
C24 N4 C34 123.7(3) . . ? 
N2 C1 N1 102.9(3) . . ? 
N2 C1 Ni1 128.9(3) . . ? 
N1 C1 Ni1 128.0(3) . . ? 
C3 C2 N1 107.2(4) . . ? 
C3 C2 H2 136(3) . . ? 
N1 C2 H2 116(3) . . ? 
C2 C3 N2 106.6(4) . . ? 
C2 C3 H3 127(3) . . ? 
N2 C3 H3 127(3) . . ? 
C9 C4 C5 122.0(4) . . ? 
C9 C4 N1 119.4(4) . . ? 
C5 C4 N1 118.5(4) . . ? 
C6 C5 C4 117.0(4) . . ? 
C6 C5 C10 121.7(4) . . ? 
C4 C5 C10 121.3(4) . . ? 
C7 C6 C5 123.2(4) . . ? 
C7 C6 H6 117(2) . . ? 
C5 C6 H6 120(2) . . ? 
C6 C7 C8 117.5(4) . . ? 
C6 C7 C11 121.5(4) . . ? 
C8 C7 C11 120.9(5) . . ? 
C9 C8 C7 122.5(5) . . ? 
C9 C8 H8 122(2) . . ? 
C7 C8 H8 115(2) . . ? 
C8 C9 C4 117.7(4) . . ? 
C8 C9 C12 120.7(4) . . ? 
C4 C9 C12 121.6(4) . . ? 
C5 C10 H10A 109.5 . . ? 
C5 C10 H10B 109.5 . . ? 
H10A C10 H10B 109.5 . . ? 
C5 C10 H10C 109.5 . . ? 
H10A C10 H10C 109.5 . . ? 
H10B C10 H10C 109.5 . . ? 
C7 C11 H11A 109.5 . . ? 
C7 C11 H11B 109.5 . . ? 
H11A C11 H11B 109.5 . . ? 
C7 C11 H11C 109.5 . . ? 
H11A C11 H11C 109.5 . . ? 
H11B C11 H11C 109.5 . . ? 
C9 C12 H12A 109.5 . . ? 
C9 C12 H12B 109.5 . . ? 
H12A C12 H12B 109.5 . . ? 
C9 C12 H12C 109.5 . . ? 
H12A C12 H12C 109.5 . . ? 
H12B C12 H12C 109.5 . . ? 
C18 C13 C14 121.8(4) . . ? 
C18 C13 N2 118.8(3) . . ? 
C14 C13 N2 119.3(4) . . ? 
C15 C14 C13 118.1(4) . . ? 
C15 C14 C19 121.3(4) . . ? 
C13 C14 C19 120.6(4) . . ? 
C16 C15 C14 121.3(4) . . ? 
C16 C15 H15 119(2) . . ? 
C14 C15 H15 119(2) . . ? 
C15 C16 C17 118.5(4) . . ? 
C15 C16 C20 120.6(5) . . ? 
C17 C16 C20 120.8(5) . . ? 
C18 C17 C16 122.7(4) . . ? 
C18 C17 H17 117(2) . . ? 
C16 C17 H17 120(2) . . ? 
C17 C18 C13 117.5(4) . . ? 
C17 C18 C21 121.5(4) . . ? 
C13 C18 C21 121.0(4) . . ? 
C14 C19 H19A 109.5 . . ? 
C14 C19 H19B 109.5 . . ? 
H19A C19 H19B 109.5 . . ? 
C14 C19 H19C 109.5 . . ? 
H19A C19 H19C 109.5 . . ? 
H19B C19 H19C 109.5 . . ? 
C16 C20 H20A 109.5 . . ? 
C16 C20 H20B 109.5 . . ? 
H20A C20 H20B 109.5 . . ? 
C16 C20 H20C 109.5 . . ? 
H20A C20 H20C 109.5 . . ? 
H20B C20 H20C 109.5 . . ? 
C18 C21 H21A 109.5 . . ? 
C18 C21 H21B 109.5 . . ? 
H21A C21 H21B 109.5 . . ? 
C18 C21 H21C 109.5 . . ? 
H21A C21 H21C 109.5 . . ? 
H21B C21 H21C 109.5 . . ? 
N3 C22 N4 103.1(3) . . ? 
N3 C22 Ni1 130.6(3) . . ? 
N4 C22 Ni1 126.0(3) . . ? 
C24 C23 N3 107.4(4) . . ? 
C24 C23 H23 132(3) . . ? 
N3 C23 H23 121(3) . . ? 
C23 C24 N4 106.9(4) . . ? 
C23 C24 H24 132(3) . . ? 
N4 C24 H24 122(3) . . ? 
C26 C25 C30 122.0(4) . . ? 
C26 C25 N3 120.1(3) . . ? 
C30 C25 N3 117.9(4) . . ? 
C25 C26 C27 117.2(4) . . ? 
C25 C26 C31 121.8(4) . . ? 
C27 C26 C31 121.0(4) . . ? 
C28 C27 C26 122.6(4) . . ? 
C28 C27 H27 118(2) . . ? 
C26 C27 H27 120(2) . . ? 
C27 C28 C29 118.1(4) . . ? 
C27 C28 C32 121.2(5) . . ? 
C29 C28 C32 120.7(4) . . ? 
C28 C29 C30 122.4(4) . . ? 
C28 C29 H29 119(3) . . ? 
C30 C29 H29 118(3) . . ? 
C29 C30 C25 117.6(4) . . ? 
C29 C30 C33 122.4(4) . . ? 
C25 C30 C33 120.0(4) . . ? 
C26 C31 H31A 109.5 . . ? 
C26 C31 H31B 109.5 . . ? 
H31A C31 H31B 109.5 . . ? 
C26 C31 H31C 109.5 . . ? 
H31A C31 H31C 109.5 . . ? 
H31B C31 H31C 109.5 . . ? 
C28 C32 H32A 109.5 . . ? 
C28 C32 H32B 109.5 . . ? 
H32A C32 H32B 109.5 . . ? 
C28 C32 H32C 109.5 . . ? 
H32A C32 H32C 109.5 . . ? 
H32B C32 H32C 109.5 . . ? 
C30 C33 H33A 109.5 . . ? 
C30 C33 H33B 109.5 . . ? 
H33A C33 H33B 109.5 . . ? 
C30 C33 H33C 109.5 . . ? 
H33A C33 H33C 109.5 . . ? 
H33B C33 H33C 109.5 . . ? 
C35 C34 C39 121.5(4) . . ? 
C35 C34 N4 119.5(4) . . ? 
C39 C34 N4 118.9(3) . . ? 
C34 C35 C36 118.7(4) . . ? 
C34 C35 C40 121.2(4) . . ? 
C36 C35 C40 120.1(4) . . ? 
C35 C36 C37 121.5(4) . . ? 
C35 C36 H36 120(2) . . ? 
C37 C36 H36 119(2) . . ? 
C38 C37 C36 118.6(4) . . ? 
C38 C37 C41 120.3(4) . . ? 
C36 C37 C41 121.1(4) . . ? 
C37 C38 C39 121.4(4) . . ? 
C37 C38 H38 117(3) . . ? 
C39 C38 H38 122(3) . . ? 
C38 C39 C34 118.2(4) . . ? 
C38 C39 C42 121.0(4) . . ? 
C34 C39 C42 120.8(4) . . ? 
C35 C40 H40A 109.5 . . ? 
C35 C40 H40B 109.5 . . ? 
H40A C40 H40B 109.5 . . ? 
C35 C40 H40C 109.5 . . ? 
H40A C40 H40C 109.5 . . ? 
H40B C40 H40C 109.5 . . ? 
C37 C41 H41A 109.5 . . ? 
C37 C41 H41B 109.5 . . ? 
H41A C41 H41B 109.5 . . ? 
C37 C41 H41C 109.5 . . ? 
H41A C41 H41C 109.5 . . ? 
H41B C41 H41C 109.5 . . ? 
C39 C42 H42A 109.5 . . ? 
C39 C42 H42B 109.5 . . ? 
H42A C42 H42B 109.5 . . ? 
C39 C42 H42C 109.5 . . ? 
H42A C42 H42C 109.5 . . ? 
H42B C42 H42C 109.5 . . ? 
 
loop_ 
 _geom_torsion_atom_site_label_1 
 _geom_torsion_atom_site_label_2 
 _geom_torsion_atom_site_label_3 
 _geom_torsion_atom_site_label_4 
 _geom_torsion 
 _geom_torsion_site_symmetry_1 
 _geom_torsion_site_symmetry_2 
 _geom_torsion_site_symmetry_3 
 _geom_torsion_site_symmetry_4 
 _geom_torsion_publ_flag 
C3 N2 C1 N1 -0.1(4) . . . . ? 
C13 N2 C1 N1 -178.7(3) . . . . ? 
C3 N2 C1 Ni1 174.2(3) . . . . ? 
C13 N2 C1 Ni1 -4.4(6) . . . . ? 
C2 N1 C1 N2 0.3(4) . . . . ? 
C4 N1 C1 N2 -178.2(3) . . . . ? 
C2 N1 C1 Ni1 -174.1(3) . . . . ? 
C4 N1 C1 Ni1 7.5(6) . . . . ? 
C22 Ni1 C1 N2 66.5(8) . . . . ? 
Br1 Ni1 C1 N2 -110.2(3) . . . . ? 
C22 Ni1 C1 N1 -120.6(7) . . . . ? 
Br1 Ni1 C1 N1 62.8(3) . . . . ? 
C1 N1 C2 C3 -0.4(5) . . . . ? 
C4 N1 C2 C3 178.1(4) . . . . ? 
N1 C2 C3 N2 0.3(5) . . . . ? 
C1 N2 C3 C2 -0.1(5) . . . . ? 
C13 N2 C3 C2 178.5(4) . . . . ? 
C1 N1 C4 C9 -108.7(5) . . . . ? 
C2 N1 C4 C9 73.0(5) . . . . ? 
C1 N1 C4 C5 71.8(5) . . . . ? 
C2 N1 C4 C5 -106.4(5) . . . . ? 
C9 C4 C5 C6 0.9(6) . . . . ? 
N1 C4 C5 C6 -179.7(4) . . . . ? 
C9 C4 C5 C10 -179.7(4) . . . . ? 
N1 C4 C5 C10 -0.3(6) . . . . ? 
C4 C5 C6 C7 1.2(6) . . . . ? 
C10 C5 C6 C7 -178.2(4) . . . . ? 
C5 C6 C7 C8 -1.9(7) . . . . ? 
C5 C6 C7 C11 177.3(4) . . . . ? 
C6 C7 C8 C9 0.5(7) . . . . ? 
C11 C7 C8 C9 -178.7(4) . . . . ? 
C7 C8 C9 C4 1.5(7) . . . . ? 
C7 C8 C9 C12 -179.4(4) . . . . ? 
C5 C4 C9 C8 -2.2(6) . . . . ? 
N1 C4 C9 C8 178.4(4) . . . . ? 
C5 C4 C9 C12 178.7(4) . . . . ? 
N1 C4 C9 C12 -0.7(6) . . . . ? 
C1 N2 C13 C18 84.5(5) . . . . ? 
C3 N2 C13 C18 -93.9(5) . . . . ? 
C1 N2 C13 C14 -98.3(5) . . . . ? 
C3 N2 C13 C14 83.2(5) . . . . ? 
C18 C13 C14 C15 3.4(6) . . . . ? 
N2 C13 C14 C15 -173.7(4) . . . . ? 
C18 C13 C14 C19 -177.2(4) . . . . ? 
N2 C13 C14 C19 5.7(6) . . . . ? 
C13 C14 C15 C16 0.7(6) . . . . ? 
C19 C14 C15 C16 -178.7(4) . . . . ? 
C14 C15 C16 C17 -3.7(7) . . . . ? 
C14 C15 C16 C20 175.4(4) . . . . ? 
C15 C16 C17 C18 2.8(7) . . . . ? 
C20 C16 C17 C18 -176.3(4) . . . . ? 
C16 C17 C18 C13 1.1(6) . . . . ? 
C16 C17 C18 C21 -179.7(4) . . . . ? 
C14 C13 C18 C17 -4.2(6) . . . . ? 
N2 C13 C18 C17 172.8(3) . . . . ? 
C14 C13 C18 C21 176.5(4) . . . . ? 
N2 C13 C18 C21 -6.4(6) . . . . ? 
C23 N3 C22 N4 0.2(4) . . . . ? 
C25 N3 C22 N4 172.7(3) . . . . ? 
C23 N3 C22 Ni1 174.4(3) . . . . ? 
C25 N3 C22 Ni1 -13.0(5) . . . . ? 
C24 N4 C22 N3 0.2(4) . . . . ? 
C34 N4 C22 N3 -178.0(3) . . . . ? 
C24 N4 C22 Ni1 -174.4(3) . . . . ? 
C34 N4 C22 Ni1 7.4(5) . . . . ? 
C1 Ni1 C22 N3 75.4(8) . . . . ? 
Br1 Ni1 C22 N3 -108.0(3) . . . . ? 
C1 Ni1 C22 N4 -111.6(7) . . . . ? 
Br1 Ni1 C22 N4 65.1(3) . . . . ? 
C22 N3 C23 C24 -0.5(5) . . . . ? 
C25 N3 C23 C24 -173.2(4) . . . . ? 
N3 C23 C24 N4 0.6(5) . . . . ? 
C22 N4 C24 C23 -0.6(5) . . . . ? 
C34 N4 C24 C23 177.7(4) . . . . ? 
C22 N3 C25 C26 81.4(5) . . . . ? 
C23 N3 C25 C26 -106.9(5) . . . . ? 
C22 N3 C25 C30 -100.3(4) . . . . ? 
C23 N3 C25 C30 71.3(5) . . . . ? 
C30 C25 C26 C27 1.5(6) . . . . ? 
N3 C25 C26 C27 179.7(3) . . . . ? 
C30 C25 C26 C31 -179.8(4) . . . . ? 
N3 C25 C26 C31 -1.6(6) . . . . ? 
C25 C26 C27 C28 0.9(6) . . . . ? 
C31 C26 C27 C28 -177.8(4) . . . . ? 
C26 C27 C28 C29 -2.2(7) . . . . ? 
C26 C27 C28 C32 176.3(4) . . . . ? 
C27 C28 C29 C30 1.2(7) . . . . ? 
C32 C28 C29 C30 -177.3(4) . . . . ? 
C28 C29 C30 C25 1.0(6) . . . . ? 
C28 C29 C30 C33 -179.5(4) . . . . ? 
C26 C25 C30 C29 -2.4(6) . . . . ? 
N3 C25 C30 C29 179.3(4) . . . . ? 
C26 C25 C30 C33 178.1(4) . . . . ? 
N3 C25 C30 C33 -0.2(5) . . . . ? 
C22 N4 C34 C35 -106.6(4) . . . . ? 
C24 N4 C34 C35 75.4(5) . . . . ? 
C22 N4 C34 C39 75.4(5) . . . . ? 
C24 N4 C34 C39 -102.7(5) . . . . ? 
C39 C34 C35 C36 -1.5(6) . . . . ? 
N4 C34 C35 C36 -179.5(4) . . . . ? 
C39 C34 C35 C40 178.2(4) . . . . ? 
N4 C34 C35 C40 0.3(6) . . . . ? 
C34 C35 C36 C37 1.1(6) . . . . ? 
C40 C35 C36 C37 -178.6(4) . . . . ? 
C35 C36 C37 C38 0.1(7) . . . . ? 
C35 C36 C37 C41 -178.8(4) . . . . ? 
C36 C37 C38 C39 -0.9(6) . . . . ? 
C41 C37 C38 C39 178.0(4) . . . . ? 
C37 C38 C39 C34 0.5(6) . . . . ? 
C37 C38 C39 C42 -179.3(4) . . . . ? 
C35 C34 C39 C38 0.7(6) . . . . ? 
N4 C34 C39 C38 178.7(3) . . . . ? 
C35 C34 C39 C42 -179.5(4) . . . . ? 
N4 C34 C39 C42 -1.5(6) . . . . ? 
 
_diffrn_measured_fraction_theta_max    0.998 
_diffrn_reflns_theta_full              27.48 
_diffrn_measured_fraction_theta_full   0.998 
_refine_diff_density_max    0.685 
_refine_diff_density_min   -0.733 
_refine_diff_density_rms    0.076 

#===END
 
data_Ni(I)IMes2I 
 
_audit_creation_method            SHELXL-97 
_chemical_name_systematic 
; 
 ? 
; 
_chemical_name_common             ? 
_chemical_melting_point           ? 
_chemical_formula_moiety          'C42 H48 Cl0.13 I N4 Ni'  
_chemical_formula_sum 
 'C42 H48 Cl0.13 I N4 Ni' 
_chemical_formula_weight          798.89 
 
loop_ 
 _atom_type_symbol 
 _atom_type_description 
 _atom_type_scat_dispersion_real 
 _atom_type_scat_dispersion_imag 
 _atom_type_scat_source 
 'C'  'C'   0.0033   0.0016 
 'International Tables Vol C Tables 4.2.6.8 and 6.1.1.4' 
 'H'  'H'   0.0000   0.0000 
 'International Tables Vol C Tables 4.2.6.8 and 6.1.1.4' 
 'N'  'N'   0.0061   0.0033 
 'International Tables Vol C Tables 4.2.6.8 and 6.1.1.4' 
 'Cl'  'Cl'   0.1484   0.1585 
 'International Tables Vol C Tables 4.2.6.8 and 6.1.1.4' 
 'I'  'I'  -0.4742   1.8119 
 'International Tables Vol C Tables 4.2.6.8 and 6.1.1.4' 
 'Ni'  'Ni'   0.3393   1.1124 
 'International Tables Vol C Tables 4.2.6.8 and 6.1.1.4' 
 
_symmetry_cell_setting            orthorhombic 
_symmetry_space_group_name_H-M    Pbca
 
loop_ 
 _symmetry_equiv_pos_as_xyz 
 'x, y, z' 
 '-x+1/2, -y, z+1/2' 
 'x+1/2, -y+1/2, -z' 
 '-x, y+1/2, -z+1/2' 
 '-x, -y, -z' 
 'x-1/2, y, -z-1/2' 
 '-x-1/2, y-1/2, z' 
 'x, -y-1/2, z-1/2' 
 
_cell_length_a                    17.7237(2) 
_cell_length_b                    18.5610(2) 
_cell_length_c                    23.7208(4) 
_cell_angle_alpha                 90.00 
_cell_angle_beta                  90.00 
_cell_angle_gamma                 90.00 
_cell_volume                      7803.42(18) 
_cell_formula_units_Z             8 
_cell_measurement_temperature     150(1) 
_cell_measurement_reflns_used     13653 
_cell_measurement_theta_min       1.018 
_cell_measurement_theta_max       27.485
 
_exptl_crystal_description        prism 
_exptl_crystal_colour             yellow
_exptl_crystal_size_max           0.33 
_exptl_crystal_size_mid           0.30 
_exptl_crystal_size_min           0.30 
_exptl_crystal_density_meas       ? 
_exptl_crystal_density_diffrn     1.360 
_exptl_crystal_density_method     'not measured' 
_exptl_crystal_F_000              3289 
_exptl_absorpt_coefficient_mu     1.330 
_exptl_absorpt_correction_type    Multi-scan 
_exptl_absorpt_correction_T_min   0.6679 
_exptl_absorpt_correction_T_max   0.6910 
_exptl_absorpt_process_details    'DENZO-SMN (Otwinowski & MInor, 1997)' 
 
_exptl_special_details 
; 
 The program Denzo-SMN (Otwinowski & Minor, 1997) uses a scaling
 algorithm (Fox & Holmes, 1966) which effectively corrects for
 absorption effects. High redundancy data were used in the scaling
 program hence the 'multi-scan' code word was used. No transmission
 coefficients are available from the program (only scale factors for each
 frame). The scale factors in the experimental table are calculated
 from the 'size' command in the SHELXL-97 input file. 
; 
 
_diffrn_ambient_temperature       150(2) 
_diffrn_radiation_wavelength      0.71073 
_diffrn_radiation_type            MoK\a 
_diffrn_radiation_source          'fine-focus sealed tube' 
_diffrn_radiation_monochromator   graphite 
_diffrn_measurement_device_type   'Nonius KappaCCD Diffractometer' 
_diffrn_measurement_method        'Phi and Omega scan' 
_diffrn_detector_area_resol_mean  ? 
_diffrn_standards_number          ? 
_diffrn_standards_interval_count  ? 
_diffrn_standards_interval_time   ? 
_diffrn_standards_decay_%         ? 
_diffrn_reflns_number             17265 
_diffrn_reflns_av_R_equivalents   0.0430 
_diffrn_reflns_av_sigmaI/netI     0.0536 
_diffrn_reflns_limit_h_min        -23 
_diffrn_reflns_limit_h_max        23 
_diffrn_reflns_limit_k_min        -24 
_diffrn_reflns_limit_k_max        24 
_diffrn_reflns_limit_l_min        -31 
_diffrn_reflns_limit_l_max        31 
_diffrn_reflns_theta_min          3.29 
_diffrn_reflns_theta_max          27.85 
_reflns_number_total              9215 
_reflns_number_gt                 6464 
_reflns_threshold_expression      >2sigma(I) 
 
_computing_data_collection        'Nonius COLLECT' 
_computing_cell_refinement        DENZO-SMN
_computing_data_reduction         DENZO-SMN
_computing_structure_solution     SIR97 
_computing_structure_refinement   'SHELXL-97 (Sheldrick, 1997)' 
_computing_molecular_graphics     'WinGx, Ortep3'
_computing_publication_material   ? 
 
_refine_special_details 
; 
 Refinement of F^2^ against ALL reflections.  The weighted R-factor wR and 
 goodness of fit S are based on F^2^, conventional R-factors R are based 
 on F, with F set to zero for negative F^2^. The threshold expression of 
 F^2^ > 2sigma(F^2^) is used only for calculating R-factors(gt) etc. and is 
 not relevant to the choice of reflections for refinement.  R-factors based 
 on F^2^ are statistically about twice as large as those based on F, and R- 
 factors based on ALL data will be even larger. 
; 
 
_refine_ls_structure_factor_coef  Fsqd  
_refine_ls_matrix_type            full 
_refine_ls_weighting_scheme       calc  
_refine_ls_weighting_details 
 'calc w=1/[\s^2^(Fo^2^)+(0.0308P)^2^+7.6562P] where P=(Fo^2^+2Fc^2^)/3' 
_atom_sites_solution_primary      direct 
_atom_sites_solution_secondary    difmap 
_atom_sites_solution_hydrogens    geom 
_refine_ls_hydrogen_treatment     constr 
_refine_ls_extinction_method      none 
_refine_ls_extinction_coef        ? 
_refine_ls_number_reflns          9215 
_refine_ls_number_parameters      451 
_refine_ls_number_restraints      0 
_refine_ls_R_factor_all           0.0752 
_refine_ls_R_factor_gt            0.0425 
_refine_ls_wR_factor_ref          0.0944 
_refine_ls_wR_factor_gt           0.0852 
_refine_ls_goodness_of_fit_ref    1.032 
_refine_ls_restrained_S_all       1.032 
_refine_ls_shift/su_max           0.001 
_refine_ls_shift/su_mean          0.000 
 
loop_ 
 _atom_site_label 
 _atom_site_type_symbol 
 _atom_site_fract_x 
 _atom_site_fract_y 
 _atom_site_fract_z 
 _atom_site_U_iso_or_equiv 
 _atom_site_adp_type 
 _atom_site_occupancy 
 _atom_site_symmetry_multiplicity 
 _atom_site_calc_flag 
 _atom_site_refinement_flags 
 _atom_site_disorder_assembly 
 _atom_site_disorder_group 
Ni1 Ni 0.122255(19) 0.853521(17) 0.662647(14) 0.02259(9) Uani 1 1 d . . . 
I1 I 0.264950(12) 0.878236(13) 0.643943(10) 0.04760(8) Uani 1 1 d . . . 
Cl1 Cl -0.0038(5) 0.8389(4) 0.6781(3) 0.0593(19) Uiso 0.13 1 d P . . 
N1 N 0.16710(14) 0.71675(12) 0.71800(10) 0.0312(6) Uani 1 1 d . . . 
N2 N 0.10968(13) 0.69548(11) 0.64045(10) 0.0291(5) Uani 1 1 d . . . 
N3 N 0.06742(14) 0.99879(12) 0.69548(9) 0.0280(5) Uani 1 1 d . . . 
N4 N 0.09412(15) 0.99499(12) 0.60743(10) 0.0330(6) Uani 1 1 d . . . 
C1 C 0.13135(15) 0.75138(15) 0.67466(11) 0.0263(6) Uani 1 1 d . . . 
C2 C 0.16778(19) 0.64301(16) 0.71071(14) 0.0409(8) Uani 1 1 d . . . 
H2 H 0.1896 0.6085 0.7354 0.049 Uiso 1 1 calc R . . 
C3 C 0.13179(19) 0.62918(15) 0.66219(14) 0.0396(8) Uani 1 1 d . . . 
H3 H 0.1231 0.5832 0.6459 0.048 Uiso 1 1 calc R . . 
C4 C 0.19877(17) 0.75296(15) 0.76633(12) 0.0325(7) Uani 1 1 d . . . 
C5 C 0.15038(19) 0.78049(15) 0.80710(12) 0.0345(7) Uani 1 1 d . . . 
C6 C 0.1832(2) 0.81411(16) 0.85354(13) 0.0408(8) Uani 1 1 d . . . 
H6 H 0.1513 0.8333 0.8820 0.049 Uiso 1 1 calc R . . 
C7 C 0.2604(2) 0.82049(17) 0.85974(13) 0.0445(8) Uani 1 1 d . . . 
C8 C 0.3068(2) 0.79110(16) 0.81856(13) 0.0420(8) Uani 1 1 d . . . 
H8 H 0.3600 0.7947 0.8227 0.050 Uiso 1 1 calc R . . 
C9 C 0.27747(18) 0.75653(18) 0.77145(13) 0.0388(8) Uani 1 1 d . . . 
C10 C 0.06611(19) 0.77474(19) 0.80184(14) 0.0463(8) Uani 1 1 d . . . 
H10A H 0.0484 0.8080 0.7726 0.069 Uiso 1 1 calc R . . 
H10B H 0.0426 0.7872 0.8379 0.069 Uiso 1 1 calc R . . 
H10C H 0.0524 0.7253 0.7916 0.069 Uiso 1 1 calc R . . 
C11 C 0.2945(3) 0.8590(2) 0.91012(16) 0.0627(11) Uani 1 1 d . . . 
H11A H 0.3186 0.9037 0.8976 0.094 Uiso 1 1 calc R . . 
H11B H 0.3323 0.8278 0.9279 0.094 Uiso 1 1 calc R . . 
H11C H 0.2547 0.8702 0.9374 0.094 Uiso 1 1 calc R . . 
C12 C 0.3299(2) 0.7229(2) 0.72838(15) 0.0516(9) Uani 1 1 d . . . 
H12A H 0.3787 0.7476 0.7293 0.077 Uiso 1 1 calc R . . 
H12B H 0.3078 0.7275 0.6907 0.077 Uiso 1 1 calc R . . 
H12C H 0.3371 0.6718 0.7373 0.077 Uiso 1 1 calc R . . 
C13 C 0.06118(17) 0.70212(14) 0.59213(13) 0.0313(7) Uani 1 1 d . . . 
C14 C -0.01525(19) 0.68687(16) 0.59963(14) 0.0390(8) Uani 1 1 d . . . 
C15 C -0.0623(2) 0.69325(17) 0.55268(17) 0.0497(9) Uani 1 1 d . . . 
H15 H -0.1147 0.6838 0.5570 0.060 Uiso 1 1 calc R . . 
C16 C -0.0355(2) 0.71270(18) 0.50052(17) 0.0532(10) Uani 1 1 d . . . 
C17 C 0.0414(2) 0.72550(17) 0.49445(14) 0.0470(9) Uani 1 1 d . . . 
H17 H 0.0606 0.7375 0.4583 0.056 Uiso 1 1 calc R . . 
C18 C 0.09153(19) 0.72124(15) 0.54003(13) 0.0346(7) Uani 1 1 d . . . 
C19 C -0.0457(2) 0.66531(18) 0.65662(16) 0.0515(9) Uani 1 1 d . . . 
H19A H -0.0252 0.6182 0.6672 0.077 Uiso 1 1 calc R . . 
H19B H -0.1008 0.6625 0.6549 0.077 Uiso 1 1 calc R . . 
H19C H -0.0308 0.7012 0.6848 0.077 Uiso 1 1 calc R . . 
C20 C -0.0884(3) 0.7215(2) 0.45042(19) 0.0800(15) Uani 1 1 d . . . 
H20A H -0.1238 0.6810 0.4493 0.120 Uiso 1 1 calc R . . 
H20B H -0.0589 0.7226 0.4155 0.120 Uiso 1 1 calc R . . 
H20C H -0.1166 0.7667 0.4543 0.120 Uiso 1 1 calc R . . 
C21 C 0.17345(19) 0.73808(18) 0.53270(14) 0.0430(8) Uani 1 1 d . . . 
H21A H 0.1838 0.7865 0.5472 0.064 Uiso 1 1 calc R . . 
H21B H 0.1865 0.7360 0.4926 0.064 Uiso 1 1 calc R . . 
H21C H 0.2037 0.7028 0.5535 0.064 Uiso 1 1 calc R . . 
C22 C 0.09190(16) 0.95244(14) 0.65467(11) 0.0248(6) Uani 1 1 d . . . 
C23 C 0.0560(2) 1.06750(16) 0.67392(13) 0.0422(8) Uani 1 1 d . . . 
H23 H 0.0394 1.1086 0.6943 0.051 Uiso 1 1 calc R . . 
C24 C 0.0726(2) 1.06476(16) 0.61942(14) 0.0448(9) Uani 1 1 d . . . 
H24 H 0.0701 1.1037 0.5934 0.054 Uiso 1 1 calc R . . 
C25 C 0.05523(16) 0.98194(13) 0.75412(12) 0.0261(6) Uani 1 1 d . . . 
C26 C 0.11581(17) 0.98645(14) 0.79119(12) 0.0291(6) Uani 1 1 d . . . 
C27 C 0.10002(19) 0.97816(16) 0.84835(12) 0.0363(7) Uani 1 1 d . . . 
H27 H 0.1403 0.9813 0.8746 0.044 Uiso 1 1 calc R . . 
C28 C 0.0281(2) 0.96563(16) 0.86818(13) 0.0428(8) Uani 1 1 d . . . 
C29 C -0.0301(2) 0.95858(16) 0.82971(15) 0.0442(8) Uani 1 1 d . . . 
H29 H -0.0795 0.9480 0.8429 0.053 Uiso 1 1 calc R . . 
C30 C -0.01775(17) 0.96658(17) 0.77219(14) 0.0368(7) Uani 1 1 d . . . 
C31 C 0.19476(19) 0.9998(2) 0.77144(14) 0.0454(8) Uani 1 1 d . . . 
H31A H 0.2158 0.9551 0.7559 0.068 Uiso 1 1 calc R . . 
H31B H 0.2257 1.0159 0.8033 0.068 Uiso 1 1 calc R . . 
H31C H 0.1945 1.0371 0.7422 0.068 Uiso 1 1 calc R . . 
C32 C 0.0121(3) 0.9624(2) 0.93099(15) 0.0679(13) Uani 1 1 d . . . 
H32A H 0.0176 1.0106 0.9473 0.102 Uiso 1 1 calc R . . 
H32B H 0.0479 0.9294 0.9491 0.102 Uiso 1 1 calc R . . 
H32C H -0.0394 0.9451 0.9371 0.102 Uiso 1 1 calc R . . 
C33 C -0.08252(19) 0.9602(2) 0.73064(17) 0.0598(11) Uani 1 1 d . . . 
H33A H -0.0684 0.9269 0.7003 0.090 Uiso 1 1 calc R . . 
H33B H -0.0936 1.0077 0.7146 0.090 Uiso 1 1 calc R . . 
H33C H -0.1273 0.9418 0.7501 0.090 Uiso 1 1 calc R . . 
C34 C 0.11614(19) 0.96997(15) 0.55220(12) 0.0344(7) Uani 1 1 d . . . 
C35 C 0.1839(2) 0.99335(17) 0.52984(13) 0.0444(9) Uani 1 1 d . . . 
C36 C 0.2049(2) 0.96664(19) 0.47732(14) 0.0524(10) Uani 1 1 d . . . 
H36 H 0.2518 0.9813 0.4616 0.063 Uiso 1 1 calc R . . 
C37 C 0.1598(2) 0.91940(17) 0.44710(13) 0.0482(9) Uani 1 1 d . . . 
C38 C 0.0910(2) 0.90076(16) 0.46995(13) 0.0408(8) Uani 1 1 d . . . 
H38 H 0.0585 0.8705 0.4488 0.049 Uiso 1 1 calc R . . 
C39 C 0.06712(19) 0.92454(15) 0.52299(12) 0.0352(7) Uani 1 1 d . . . 
C40 C 0.2346(3) 1.0459(2) 0.56071(15) 0.0656(12) Uani 1 1 d . . . 
H40A H 0.2160 1.0951 0.5551 0.098 Uiso 1 1 calc R . . 
H40B H 0.2861 1.0421 0.5459 0.098 Uiso 1 1 calc R . . 
H40C H 0.2347 1.0345 0.6010 0.098 Uiso 1 1 calc R . . 
C41 C 0.1843(3) 0.8904(2) 0.39019(15) 0.0666(12) Uani 1 1 d . . . 
H41A H 0.2272 0.9185 0.3762 0.100 Uiso 1 1 calc R . . 
H41B H 0.1423 0.8940 0.3635 0.100 Uiso 1 1 calc R . . 
H41C H 0.1993 0.8398 0.3941 0.100 Uiso 1 1 calc R . . 
C42 C -0.00783(19) 0.90247(17) 0.54646(14) 0.0403(8) Uani 1 1 d . . . 
H42A H -0.0002 0.8674 0.5768 0.060 Uiso 1 1 calc R . . 
H42B H -0.0383 0.8806 0.5165 0.060 Uiso 1 1 calc R . . 
H42C H -0.0340 0.9449 0.5614 0.060 Uiso 1 1 calc R . . 
 
loop_ 
 _atom_site_aniso_label 
 _atom_site_aniso_U_11 
 _atom_site_aniso_U_22 
 _atom_site_aniso_U_33 
 _atom_site_aniso_U_23 
 _atom_site_aniso_U_13 
 _atom_site_aniso_U_12 
Ni1 0.02452(17) 0.01945(17) 0.02379(17) -0.00191(13) -0.00024(15) 0.00203(14) 
I1 0.02965(11) 0.05904(16) 0.05410(15) -0.00625(11) 0.00492(10) 0.00103(10) 
N1 0.0344(14) 0.0240(13) 0.0353(14) 0.0014(10) -0.0025(11) 0.0078(10) 
N2 0.0321(13) 0.0193(12) 0.0358(13) -0.0033(10) 0.0008(11) 0.0023(10) 
N3 0.0345(14) 0.0207(12) 0.0289(13) -0.0041(9) -0.0068(11) 0.0023(10) 
N4 0.0503(17) 0.0216(12) 0.0271(13) 0.0016(9) -0.0094(12) -0.0061(11) 
C1 0.0235(14) 0.0268(14) 0.0285(15) -0.0019(11) 0.0031(12) 0.0027(12) 
C2 0.0450(19) 0.0248(16) 0.053(2) 0.0032(14) -0.0049(17) 0.0116(14) 
C3 0.046(2) 0.0196(15) 0.053(2) -0.0016(13) 0.0003(17) 0.0051(13) 
C4 0.0360(17) 0.0287(15) 0.0327(17) 0.0036(12) -0.0060(14) 0.0091(14) 
C5 0.0453(19) 0.0260(15) 0.0321(17) 0.0082(12) 0.0038(14) 0.0065(14) 
C6 0.056(2) 0.0344(17) 0.0324(17) 0.0047(13) 0.0034(16) 0.0107(15) 
C7 0.065(2) 0.0311(17) 0.0378(18) 0.0028(14) -0.0119(18) 0.0072(16) 
C8 0.045(2) 0.0357(18) 0.0459(19) 0.0000(14) -0.0136(16) 0.0061(15) 
C9 0.0402(19) 0.0370(18) 0.0393(18) 0.0008(14) -0.0056(15) 0.0105(14) 
C10 0.044(2) 0.053(2) 0.0423(19) 0.0038(16) 0.0106(16) 0.0055(17) 
C11 0.083(3) 0.051(2) 0.054(2) -0.0104(18) -0.015(2) -0.003(2) 
C12 0.039(2) 0.062(2) 0.054(2) -0.0103(17) -0.0052(17) 0.0198(17) 
C13 0.0337(16) 0.0185(14) 0.0418(18) -0.0080(12) -0.0037(14) -0.0001(12) 
C14 0.0367(18) 0.0251(16) 0.055(2) -0.0090(14) -0.0026(16) -0.0016(13) 
C15 0.0371(19) 0.0346(19) 0.077(3) -0.0164(17) -0.0123(19) -0.0045(15) 
C16 0.063(3) 0.0327(19) 0.063(3) -0.0171(17) -0.028(2) -0.0003(17) 
C17 0.069(3) 0.0320(18) 0.0404(19) -0.0121(14) -0.0099(18) 0.0024(17) 
C18 0.0425(18) 0.0225(15) 0.0387(18) -0.0093(12) -0.0021(15) 0.0028(13) 
C19 0.0398(19) 0.0380(19) 0.077(3) 0.0026(17) 0.0127(19) -0.0032(15) 
C20 0.086(3) 0.066(3) 0.088(3) -0.014(2) -0.053(3) 0.004(2) 
C21 0.042(2) 0.044(2) 0.0421(19) -0.0034(15) 0.0067(16) 0.0009(15) 
C22 0.0282(14) 0.0215(13) 0.0245(14) 0.0000(10) -0.0055(12) -0.0044(11) 
C23 0.063(2) 0.0202(15) 0.044(2) -0.0049(13) -0.0163(17) 0.0078(15) 
C24 0.070(3) 0.0210(16) 0.0430(19) 0.0039(13) -0.0173(18) -0.0012(15) 
C25 0.0296(15) 0.0189(14) 0.0298(15) -0.0076(11) 0.0002(13) 0.0013(11) 
C26 0.0295(15) 0.0249(15) 0.0329(16) -0.0034(11) -0.0024(13) -0.0014(12) 
C27 0.0445(19) 0.0326(16) 0.0318(17) -0.0033(12) -0.0045(15) 0.0011(14) 
C28 0.063(2) 0.0286(17) 0.0366(19) -0.0037(13) 0.0111(17) 0.0001(16) 
C29 0.0427(19) 0.0342(18) 0.056(2) -0.0114(15) 0.0208(18) -0.0014(15) 
C30 0.0292(16) 0.0343(17) 0.0470(19) -0.0103(14) 0.0014(15) 0.0021(13) 
C31 0.0354(19) 0.062(2) 0.0385(19) 0.0000(16) -0.0079(16) -0.0136(17) 
C32 0.104(4) 0.059(2) 0.041(2) -0.0009(17) 0.028(2) -0.005(2) 
C33 0.0281(18) 0.079(3) 0.072(3) -0.017(2) -0.0047(18) -0.0033(19) 
C34 0.053(2) 0.0268(15) 0.0237(15) 0.0050(11) -0.0075(14) -0.0093(14) 
C35 0.065(2) 0.0376(18) 0.0308(17) 0.0082(13) -0.0060(17) -0.0210(17) 
C36 0.073(3) 0.048(2) 0.0364(19) 0.0104(15) 0.0095(19) -0.021(2) 
C37 0.083(3) 0.0342(18) 0.0272(16) 0.0061(13) -0.0007(18) -0.0079(18) 
C38 0.064(2) 0.0285(16) 0.0300(17) -0.0001(13) -0.0126(16) -0.0067(16) 
C39 0.052(2) 0.0238(15) 0.0299(16) 0.0045(12) -0.0129(15) -0.0027(14) 
C40 0.084(3) 0.069(3) 0.044(2) 0.0052(18) 0.001(2) -0.046(2) 
C41 0.106(4) 0.060(2) 0.035(2) -0.0017(16) 0.011(2) -0.011(3) 
C42 0.0448(19) 0.0362(18) 0.0399(18) -0.0035(14) -0.0130(15) -0.0033(15) 
 
_geom_special_details 
; 
 All esds (except the esd in the dihedral angle between two l.s. planes) 
 are estimated using the full covariance matrix.  The cell esds are taken 
 into account individually in the estimation of esds in distances, angles 
 and torsion angles; correlations between esds in cell parameters are only 
 used when they are defined by crystal symmetry.  An approximate (isotropic) 
 treatment of cell esds is used for estimating esds involving l.s. planes. 
; 
 
loop_ 
 _geom_bond_atom_site_label_1 
 _geom_bond_atom_site_label_2 
 _geom_bond_distance 
 _geom_bond_site_symmetry_2 
 _geom_bond_publ_flag 
Ni1 C22 1.923(3) . ? 
Ni1 C1 1.924(3) . ? 
Ni1 Cl1 2.280(8) . ? 
Ni1 I1 2.6084(4) . ? 
N1 C1 1.368(3) . ? 
N1 C2 1.380(4) . ? 
N1 C4 1.443(4) . ? 
N2 C1 1.372(3) . ? 
N2 C3 1.391(3) . ? 
N2 C13 1.438(4) . ? 
N3 C22 1.366(3) . ? 
N3 C23 1.389(4) . ? 
N3 C25 1.442(3) . ? 
N4 C22 1.371(3) . ? 
N4 C24 1.380(4) . ? 
N4 C34 1.444(4) . ? 
C2 C3 1.341(5) . ? 
C2 H2 0.9500 . ? 
C3 H3 0.9500 . ? 
C4 C5 1.390(4) . ? 
C4 C9 1.402(4) . ? 
C5 C6 1.393(4) . ? 
C5 C10 1.503(5) . ? 
C6 C7 1.382(5) . ? 
C6 H6 0.9500 . ? 
C7 C8 1.388(5) . ? 
C7 C11 1.518(5) . ? 
C8 C9 1.390(4) . ? 
C8 H8 0.9500 . ? 
C9 C12 1.516(4) . ? 
C10 H10A 0.9800 . ? 
C10 H10B 0.9800 . ? 
C10 H10C 0.9800 . ? 
C11 H11A 0.9800 . ? 
C11 H11B 0.9800 . ? 
C11 H11C 0.9800 . ? 
C12 H12A 0.9800 . ? 
C12 H12B 0.9800 . ? 
C12 H12C 0.9800 . ? 
C13 C18 1.394(4) . ? 
C13 C14 1.395(4) . ? 
C14 C15 1.397(5) . ? 
C14 C19 1.509(5) . ? 
C15 C16 1.374(5) . ? 
C15 H15 0.9500 . ? 
C16 C17 1.391(5) . ? 
C16 C20 1.523(5) . ? 
C17 C18 1.401(5) . ? 
C17 H17 0.9500 . ? 
C18 C21 1.495(5) . ? 
C19 H19A 0.9800 . ? 
C19 H19B 0.9800 . ? 
C19 H19C 0.9800 . ? 
C20 H20A 0.9800 . ? 
C20 H20B 0.9800 . ? 
C20 H20C 0.9800 . ? 
C21 H21A 0.9800 . ? 
C21 H21B 0.9800 . ? 
C21 H21C 0.9800 . ? 
C23 C24 1.327(4) . ? 
C23 H23 0.9500 . ? 
C24 H24 0.9500 . ? 
C25 C26 1.390(4) . ? 
C25 C30 1.392(4) . ? 
C26 C27 1.393(4) . ? 
C26 C31 1.496(4) . ? 
C27 C28 1.378(5) . ? 
C27 H27 0.9500 . ? 
C28 C29 1.383(5) . ? 
C28 C32 1.518(4) . ? 
C29 C30 1.390(4) . ? 
C29 H29 0.9500 . ? 
C30 C33 1.518(5) . ? 
C31 H31A 0.9800 . ? 
C31 H31B 0.9800 . ? 
C31 H31C 0.9800 . ? 
C32 H32A 0.9800 . ? 
C32 H32B 0.9800 . ? 
C32 H32C 0.9800 . ? 
C33 H33A 0.9800 . ? 
C33 H33B 0.9800 . ? 
C33 H33C 0.9800 . ? 
C34 C35 1.382(5) . ? 
C34 C39 1.395(4) . ? 
C35 C36 1.392(5) . ? 
C35 C40 1.515(5) . ? 
C36 C37 1.386(5) . ? 
C36 H36 0.9500 . ? 
C37 C38 1.378(5) . ? 
C37 C41 1.517(5) . ? 
C38 C39 1.399(4) . ? 
C38 H38 0.9500 . ? 
C39 C42 1.497(5) . ? 
C40 H40A 0.9800 . ? 
C40 H40B 0.9800 . ? 
C40 H40C 0.9800 . ? 
C41 H41A 0.9800 . ? 
C41 H41B 0.9800 . ? 
C41 H41C 0.9800 . ? 
C42 H42A 0.9800 . ? 
C42 H42B 0.9800 . ? 
C42 H42C 0.9800 . ? 
 
loop_ 
 _geom_angle_atom_site_label_1 
 _geom_angle_atom_site_label_2 
 _geom_angle_atom_site_label_3 
 _geom_angle 
 _geom_angle_site_symmetry_1 
 _geom_angle_site_symmetry_3 
 _geom_angle_publ_flag 
C22 Ni1 C1 168.26(12) . . ? 
C22 Ni1 Cl1 81.7(2) . . ? 
C1 Ni1 Cl1 86.6(2) . . ? 
C22 Ni1 I1 94.97(8) . . ? 
C1 Ni1 I1 96.74(8) . . ? 
Cl1 Ni1 I1 176.7(2) . . ? 
C1 N1 C2 112.1(2) . . ? 
C1 N1 C4 124.0(2) . . ? 
C2 N1 C4 123.9(2) . . ? 
C1 N2 C3 111.8(2) . . ? 
C1 N2 C13 125.0(2) . . ? 
C3 N2 C13 122.7(2) . . ? 
C22 N3 C23 111.3(2) . . ? 
C22 N3 C25 126.5(2) . . ? 
C23 N3 C25 122.2(2) . . ? 
C22 N4 C24 111.4(2) . . ? 
C22 N4 C34 124.3(2) . . ? 
C24 N4 C34 124.3(2) . . ? 
N1 C1 N2 102.6(2) . . ? 
N1 C1 Ni1 127.8(2) . . ? 
N2 C1 Ni1 129.4(2) . . ? 
C3 C2 N1 107.1(3) . . ? 
C3 C2 H2 126.5 . . ? 
N1 C2 H2 126.5 . . ? 
C2 C3 N2 106.4(3) . . ? 
C2 C3 H3 126.8 . . ? 
N2 C3 H3 126.8 . . ? 
C5 C4 C9 122.4(3) . . ? 
C5 C4 N1 119.0(3) . . ? 
C9 C4 N1 118.6(3) . . ? 
C4 C5 C6 117.2(3) . . ? 
C4 C5 C10 122.0(3) . . ? 
C6 C5 C10 120.8(3) . . ? 
C7 C6 C5 122.4(3) . . ? 
C7 C6 H6 118.8 . . ? 
C5 C6 H6 118.8 . . ? 
C6 C7 C8 118.6(3) . . ? 
C6 C7 C11 121.2(3) . . ? 
C8 C7 C11 120.2(4) . . ? 
C7 C8 C9 121.7(3) . . ? 
C7 C8 H8 119.1 . . ? 
C9 C8 H8 119.1 . . ? 
C8 C9 C4 117.6(3) . . ? 
C8 C9 C12 120.2(3) . . ? 
C4 C9 C12 122.2(3) . . ? 
C5 C10 H10A 109.5 . . ? 
C5 C10 H10B 109.5 . . ? 
H10A C10 H10B 109.5 . . ? 
C5 C10 H10C 109.5 . . ? 
H10A C10 H10C 109.5 . . ? 
H10B C10 H10C 109.5 . . ? 
C7 C11 H11A 109.5 . . ? 
C7 C11 H11B 109.5 . . ? 
H11A C11 H11B 109.5 . . ? 
C7 C11 H11C 109.5 . . ? 
H11A C11 H11C 109.5 . . ? 
H11B C11 H11C 109.5 . . ? 
C9 C12 H12A 109.5 . . ? 
C9 C12 H12B 109.5 . . ? 
H12A C12 H12B 109.5 . . ? 
C9 C12 H12C 109.5 . . ? 
H12A C12 H12C 109.5 . . ? 
H12B C12 H12C 109.5 . . ? 
C18 C13 C14 122.6(3) . . ? 
C18 C13 N2 119.9(3) . . ? 
C14 C13 N2 117.5(3) . . ? 
C13 C14 C15 117.5(3) . . ? 
C13 C14 C19 121.0(3) . . ? 
C15 C14 C19 121.5(3) . . ? 
C16 C15 C14 122.2(3) . . ? 
C16 C15 H15 118.9 . . ? 
C14 C15 H15 118.9 . . ? 
C15 C16 C17 118.5(3) . . ? 
C15 C16 C20 121.2(4) . . ? 
C17 C16 C20 120.3(4) . . ? 
C16 C17 C18 122.1(3) . . ? 
C16 C17 H17 118.9 . . ? 
C18 C17 H17 118.9 . . ? 
C13 C18 C17 117.0(3) . . ? 
C13 C18 C21 122.1(3) . . ? 
C17 C18 C21 120.9(3) . . ? 
C14 C19 H19A 109.5 . . ? 
C14 C19 H19B 109.5 . . ? 
H19A C19 H19B 109.5 . . ? 
C14 C19 H19C 109.5 . . ? 
H19A C19 H19C 109.5 . . ? 
H19B C19 H19C 109.5 . . ? 
C16 C20 H20A 109.5 . . ? 
C16 C20 H20B 109.5 . . ? 
H20A C20 H20B 109.5 . . ? 
C16 C20 H20C 109.5 . . ? 
H20A C20 H20C 109.5 . . ? 
H20B C20 H20C 109.5 . . ? 
C18 C21 H21A 109.5 . . ? 
C18 C21 H21B 109.5 . . ? 
H21A C21 H21B 109.5 . . ? 
C18 C21 H21C 109.5 . . ? 
H21A C21 H21C 109.5 . . ? 
H21B C21 H21C 109.5 . . ? 
N3 C22 N4 103.0(2) . . ? 
N3 C22 Ni1 128.36(19) . . ? 
N4 C22 Ni1 128.5(2) . . ? 
C24 C23 N3 106.9(3) . . ? 
C24 C23 H23 126.5 . . ? 
N3 C23 H23 126.5 . . ? 
C23 C24 N4 107.3(3) . . ? 
C23 C24 H24 126.3 . . ? 
N4 C24 H24 126.3 . . ? 
C26 C25 C30 122.4(3) . . ? 
C26 C25 N3 118.8(3) . . ? 
C30 C25 N3 118.7(3) . . ? 
C25 C26 C27 117.0(3) . . ? 
C25 C26 C31 122.3(3) . . ? 
C27 C26 C31 120.7(3) . . ? 
C28 C27 C26 122.4(3) . . ? 
C28 C27 H27 118.8 . . ? 
C26 C27 H27 118.8 . . ? 
C27 C28 C29 118.7(3) . . ? 
C27 C28 C32 120.9(3) . . ? 
C29 C28 C32 120.3(4) . . ? 
C28 C29 C30 121.4(3) . . ? 
C28 C29 H29 119.3 . . ? 
C30 C29 H29 119.3 . . ? 
C29 C30 C25 118.0(3) . . ? 
C29 C30 C33 120.7(3) . . ? 
C25 C30 C33 121.3(3) . . ? 
C26 C31 H31A 109.5 . . ? 
C26 C31 H31B 109.5 . . ? 
H31A C31 H31B 109.5 . . ? 
C26 C31 H31C 109.5 . . ? 
H31A C31 H31C 109.5 . . ? 
H31B C31 H31C 109.5 . . ? 
C28 C32 H32A 109.5 . . ? 
C28 C32 H32B 109.5 . . ? 
H32A C32 H32B 109.5 . . ? 
C28 C32 H32C 109.5 . . ? 
H32A C32 H32C 109.5 . . ? 
H32B C32 H32C 109.5 . . ? 
C30 C33 H33A 109.5 . . ? 
C30 C33 H33B 109.5 . . ? 
H33A C33 H33B 109.5 . . ? 
C30 C33 H33C 109.5 . . ? 
H33A C33 H33C 109.5 . . ? 
H33B C33 H33C 109.5 . . ? 
C35 C34 C39 122.7(3) . . ? 
C35 C34 N4 118.8(3) . . ? 
C39 C34 N4 118.5(3) . . ? 
C34 C35 C36 117.7(3) . . ? 
C34 C35 C40 122.2(3) . . ? 
C36 C35 C40 120.2(3) . . ? 
C37 C36 C35 122.3(4) . . ? 
C37 C36 H36 118.9 . . ? 
C35 C36 H36 118.9 . . ? 
C38 C37 C36 117.7(3) . . ? 
C38 C37 C41 120.9(3) . . ? 
C36 C37 C41 121.4(4) . . ? 
C37 C38 C39 122.8(3) . . ? 
C37 C38 H38 118.6 . . ? 
C39 C38 H38 118.6 . . ? 
C34 C39 C38 116.7(3) . . ? 
C34 C39 C42 122.2(3) . . ? 
C38 C39 C42 121.1(3) . . ? 
C35 C40 H40A 109.5 . . ? 
C35 C40 H40B 109.5 . . ? 
H40A C40 H40B 109.5 . . ? 
C35 C40 H40C 109.5 . . ? 
H40A C40 H40C 109.5 . . ? 
H40B C40 H40C 109.5 . . ? 
C37 C41 H41A 109.5 . . ? 
C37 C41 H41B 109.5 . . ? 
H41A C41 H41B 109.5 . . ? 
C37 C41 H41C 109.5 . . ? 
H41A C41 H41C 109.5 . . ? 
H41B C41 H41C 109.5 . . ? 
C39 C42 H42A 109.5 . . ? 
C39 C42 H42B 109.5 . . ? 
H42A C42 H42B 109.5 . . ? 
C39 C42 H42C 109.5 . . ? 
H42A C42 H42C 109.5 . . ? 
H42B C42 H42C 109.5 . . ? 
 
loop_ 
 _geom_torsion_atom_site_label_1 
 _geom_torsion_atom_site_label_2 
 _geom_torsion_atom_site_label_3 
 _geom_torsion_atom_site_label_4 
 _geom_torsion 
 _geom_torsion_site_symmetry_1 
 _geom_torsion_site_symmetry_2 
 _geom_torsion_site_symmetry_3 
 _geom_torsion_site_symmetry_4 
 _geom_torsion_publ_flag 
C2 N1 C1 N2 0.3(3) . . . . ? 
C4 N1 C1 N2 -178.3(3) . . . . ? 
C2 N1 C1 Ni1 -175.0(2) . . . . ? 
C4 N1 C1 Ni1 6.4(4) . . . . ? 
C3 N2 C1 N1 -0.2(3) . . . . ? 
C13 N2 C1 N1 171.6(3) . . . . ? 
C3 N2 C1 Ni1 175.0(2) . . . . ? 
C13 N2 C1 Ni1 -13.2(4) . . . . ? 
C22 Ni1 C1 N1 -108.9(6) . . . . ? 
Cl1 Ni1 C1 N1 -113.4(3) . . . . ? 
I1 Ni1 C1 N1 66.7(2) . . . . ? 
C22 Ni1 C1 N2 77.0(6) . . . . ? 
Cl1 Ni1 C1 N2 72.5(3) . . . . ? 
I1 Ni1 C1 N2 -107.4(2) . . . . ? 
C1 N1 C2 C3 -0.3(4) . . . . ? 
C4 N1 C2 C3 178.3(3) . . . . ? 
N1 C2 C3 N2 0.1(4) . . . . ? 
C1 N2 C3 C2 0.1(4) . . . . ? 
C13 N2 C3 C2 -172.0(3) . . . . ? 
C1 N1 C4 C5 73.5(4) . . . . ? 
C2 N1 C4 C5 -104.9(3) . . . . ? 
C1 N1 C4 C9 -109.0(3) . . . . ? 
C2 N1 C4 C9 72.6(4) . . . . ? 
C9 C4 C5 C6 1.6(4) . . . . ? 
N1 C4 C5 C6 179.1(2) . . . . ? 
C9 C4 C5 C10 -178.5(3) . . . . ? 
N1 C4 C5 C10 -1.1(4) . . . . ? 
C4 C5 C6 C7 0.0(4) . . . . ? 
C10 C5 C6 C7 -179.9(3) . . . . ? 
C5 C6 C7 C8 -1.2(5) . . . . ? 
C5 C6 C7 C11 178.5(3) . . . . ? 
C6 C7 C8 C9 0.8(5) . . . . ? 
C11 C7 C8 C9 -178.9(3) . . . . ? 
C7 C8 C9 C4 0.8(5) . . . . ? 
C7 C8 C9 C12 -177.9(3) . . . . ? 
C5 C4 C9 C8 -2.0(5) . . . . ? 
N1 C4 C9 C8 -179.4(3) . . . . ? 
C5 C4 C9 C12 176.7(3) . . . . ? 
N1 C4 C9 C12 -0.8(4) . . . . ? 
C1 N2 C13 C18 85.0(3) . . . . ? 
C3 N2 C13 C18 -104.0(3) . . . . ? 
C1 N2 C13 C14 -96.7(3) . . . . ? 
C3 N2 C13 C14 74.3(4) . . . . ? 
C18 C13 C14 C15 -1.7(4) . . . . ? 
N2 C13 C14 C15 -179.9(2) . . . . ? 
C18 C13 C14 C19 179.1(3) . . . . ? 
N2 C13 C14 C19 0.9(4) . . . . ? 
C13 C14 C15 C16 0.9(5) . . . . ? 
C19 C14 C15 C16 -179.9(3) . . . . ? 
C14 C15 C16 C17 0.8(5) . . . . ? 
C14 C15 C16 C20 -178.1(3) . . . . ? 
C15 C16 C17 C18 -1.9(5) . . . . ? 
C20 C16 C17 C18 177.0(3) . . . . ? 
C14 C13 C18 C17 0.7(4) . . . . ? 
N2 C13 C18 C17 178.9(2) . . . . ? 
C14 C13 C18 C21 179.4(3) . . . . ? 
N2 C13 C18 C21 -2.4(4) . . . . ? 
C16 C17 C18 C13 1.2(4) . . . . ? 
C16 C17 C18 C21 -177.6(3) . . . . ? 
C23 N3 C22 N4 -0.7(3) . . . . ? 
C25 N3 C22 N4 -179.7(3) . . . . ? 
C23 N3 C22 Ni1 175.6(2) . . . . ? 
C25 N3 C22 Ni1 -3.5(4) . . . . ? 
C24 N4 C22 N3 0.6(3) . . . . ? 
C34 N4 C22 N3 -179.3(3) . . . . ? 
C24 N4 C22 Ni1 -175.6(2) . . . . ? 
C34 N4 C22 Ni1 4.4(4) . . . . ? 
C1 Ni1 C22 N3 65.9(6) . . . . ? 
Cl1 Ni1 C22 N3 70.4(3) . . . . ? 
I1 Ni1 C22 N3 -109.7(2) . . . . ? 
C1 Ni1 C22 N4 -118.8(5) . . . . ? 
Cl1 Ni1 C22 N4 -114.2(3) . . . . ? 
I1 Ni1 C22 N4 65.6(3) . . . . ? 
C22 N3 C23 C24 0.5(4) . . . . ? 
C25 N3 C23 C24 179.6(3) . . . . ? 
N3 C23 C24 N4 0.0(4) . . . . ? 
C22 N4 C24 C23 -0.4(4) . . . . ? 
C34 N4 C24 C23 179.6(3) . . . . ? 
C22 N3 C25 C26 86.3(3) . . . . ? 
C23 N3 C25 C26 -92.6(3) . . . . ? 
C22 N3 C25 C30 -98.0(3) . . . . ? 
C23 N3 C25 C30 83.0(4) . . . . ? 
C30 C25 C26 C27 -2.9(4) . . . . ? 
N3 C25 C26 C27 172.6(2) . . . . ? 
C30 C25 C26 C31 177.3(3) . . . . ? 
N3 C25 C26 C31 -7.2(4) . . . . ? 
C25 C26 C27 C28 0.3(4) . . . . ? 
C31 C26 C27 C28 -179.8(3) . . . . ? 
C26 C27 C28 C29 2.3(5) . . . . ? 
C26 C27 C28 C32 -175.4(3) . . . . ? 
C27 C28 C29 C30 -2.5(5) . . . . ? 
C32 C28 C29 C30 175.2(3) . . . . ? 
C28 C29 C30 C25 0.1(5) . . . . ? 
C28 C29 C30 C33 -178.7(3) . . . . ? 
C26 C25 C30 C29 2.7(4) . . . . ? 
N3 C25 C30 C29 -172.8(2) . . . . ? 
C26 C25 C30 C33 -178.5(3) . . . . ? 
N3 C25 C30 C33 6.0(4) . . . . ? 
C22 N4 C34 C35 -110.0(3) . . . . ? 
C24 N4 C34 C35 70.1(4) . . . . ? 
C22 N4 C34 C39 71.6(4) . . . . ? 
C24 N4 C34 C39 -108.3(3) . . . . ? 
C39 C34 C35 C36 -3.7(5) . . . . ? 
N4 C34 C35 C36 178.0(3) . . . . ? 
C39 C34 C35 C40 176.6(3) . . . . ? 
N4 C34 C35 C40 -1.7(5) . . . . ? 
C34 C35 C36 C37 1.3(5) . . . . ? 
C40 C35 C36 C37 -179.0(4) . . . . ? 
C35 C36 C37 C38 2.0(5) . . . . ? 
C35 C36 C37 C41 -179.4(3) . . . . ? 
C36 C37 C38 C39 -3.3(5) . . . . ? 
C41 C37 C38 C39 178.1(3) . . . . ? 
C35 C34 C39 C38 2.5(5) . . . . ? 
N4 C34 C39 C38 -179.2(3) . . . . ? 
C35 C34 C39 C42 -176.9(3) . . . . ? 
N4 C34 C39 C42 1.4(4) . . . . ? 
C37 C38 C39 C34 1.1(5) . . . . ? 
C37 C38 C39 C42 -179.5(3) . . . . ? 
 
_diffrn_measured_fraction_theta_max    0.993 
_diffrn_reflns_theta_full              27.85 
_diffrn_measured_fraction_theta_full   0.993 
_refine_diff_density_max    0.639 
_refine_diff_density_min   -1.189 
_refine_diff_density_rms    0.086 

#===END

 
data_tmiy2Ni(II)CF3PhBr 
 
_audit_creation_method            SHELXL-97 
_chemical_name_systematic 
; 
 ? 
; 
_chemical_name_common             ? 
_chemical_melting_point           ? 
_chemical_formula_moiety          
 '2(C21 H28 Br F3 N4 Ni), C7 H15 O' 
_chemical_formula_sum 
 'C49 H71 Br2 F6 N8 Ni2 O' 
_chemical_formula_weight          1179.38
 
loop_ 
 _atom_type_symbol 
 _atom_type_description 
 _atom_type_scat_dispersion_real 
 _atom_type_scat_dispersion_imag 
 _atom_type_scat_source 
 'C'  'C'   0.0033   0.0016 
 'International Tables Vol C Tables 4.2.6.8 and 6.1.1.4' 
 'H'  'H'   0.0000   0.0000 
 'International Tables Vol C Tables 4.2.6.8 and 6.1.1.4' 
 'N'  'N'   0.0061   0.0033 
 'International Tables Vol C Tables 4.2.6.8 and 6.1.1.4' 
 'O'  'O'   0.0106   0.0060 
 'International Tables Vol C Tables 4.2.6.8 and 6.1.1.4' 
 'F'  'F'   0.0171   0.0103 
 'International Tables Vol C Tables 4.2.6.8 and 6.1.1.4' 
 'Br'  'Br'  -0.2901   2.4595 
 'International Tables Vol C Tables 4.2.6.8 and 6.1.1.4' 
 'Ni'  'Ni'   0.3393   1.1124 
 'International Tables Vol C Tables 4.2.6.8 and 6.1.1.4' 
 
_symmetry_cell_setting            triclinic 
_symmetry_space_group_name_H-M    P-1
_symmetry_space_group_name_Hall   ' -P 1'
 
loop_ 
 _symmetry_equiv_pos_as_xyz 
 'x, y, z' 
 '-x, -y, -z' 
 
_cell_length_a                    8.7324(3) 
_cell_length_b                    9.6551(4) 
_cell_length_c                    17.4439(7) 
_cell_angle_alpha                 99.5050(17) 
_cell_angle_beta                  95.820(3) 
_cell_angle_gamma                 114.465(2) 
_cell_volume                      1296.47(9) 
_cell_formula_units_Z             1 
_cell_measurement_temperature     150(1) 
_cell_measurement_reflns_used     5694 
_cell_measurement_theta_min       1.018
_cell_measurement_theta_max       27.485
 
_exptl_crystal_description        plate 
_exptl_crystal_colour             brown 
_exptl_crystal_size_max           0.35 
_exptl_crystal_size_mid           0.35 
_exptl_crystal_size_min           0.13 
_exptl_crystal_density_meas       ? 
_exptl_crystal_density_diffrn     1.511 
_exptl_crystal_density_method     'not measured' 
_exptl_crystal_F_000              609 
_exptl_absorpt_coefficient_mu     2.333 
_exptl_absorpt_correction_type    Multi-scan 
_exptl_absorpt_correction_T_min   0.4956 
_exptl_absorpt_correction_T_max   0.7513 
_exptl_absorpt_process_details    'DENZO-SMN (Otwinowski & Minor, 1997)' 
 
_exptl_special_details 
; 
  The program Denzo-SMN (Otwinowski & Minor, 1997) uses a scaling
 algorithm (Fox & Holmes, 1966) which effectively corrects for
 absorption effects. High redundancy data were used in the scaling
 program hence the 'multi-scan' code word was used. No transmission
 coefficients are available from the program (only scale factors for each
 frame). The scale factors in the experimental table are calculated
 from the 'size' command in the SHELXL-97 input file.
; 
 
_diffrn_ambient_temperature       150(1) 
_diffrn_radiation_wavelength      0.71073 
_diffrn_radiation_type            MoK\a 
_diffrn_radiation_source          'fine-focus sealed tube' 
_diffrn_radiation_monochromator   graphite 
_diffrn_measurement_device_type   'Nonius KappaCCD Diffractometer' 
_diffrn_measurement_method        'Phi and Omega scan' 
_diffrn_detector_area_resol_mean  ? 
_diffrn_standards_number          ? 
_diffrn_standards_interval_count  ? 
_diffrn_standards_interval_time   ? 
_diffrn_standards_decay_%         ? 
_diffrn_reflns_number             11153 
_diffrn_reflns_av_R_equivalents   0.0228 
_diffrn_reflns_av_sigmaI/netI     0.0355 
_diffrn_reflns_limit_h_min        -11 
_diffrn_reflns_limit_h_max        11 
_diffrn_reflns_limit_k_min        -12 
_diffrn_reflns_limit_k_max        12 
_diffrn_reflns_limit_l_min        -22 
_diffrn_reflns_limit_l_max        22 
_diffrn_reflns_theta_min          2.38 
_diffrn_reflns_theta_max          27.50 
_reflns_number_total              5903 
_reflns_number_gt                 4681 
_reflns_threshold_expression      >2sigma(I) 
 
_computing_data_collection        'Nonius COLLECT' 
_computing_cell_refinement        DENZO-SMN
_computing_data_reduction         DENZO-SMN 
_computing_structure_solution     SIR97 
_computing_structure_refinement   'SHELXL-97 (Sheldrick, 1997)' 
_computing_molecular_graphics     'WinGX, Ortep3' 
_computing_publication_material   ? 
 
_refine_special_details 
; 
 Refinement of F^2^ against ALL reflections.  The weighted R-factor wR and 
 goodness of fit S are based on F^2^, conventional R-factors R are based 
 on F, with F set to zero for negative F^2^. The threshold expression of 
 F^2^ > 2sigma(F^2^) is used only for calculating R-factors(gt) etc. and is 
 not relevant to the choice of reflections for refinement.  R-factors based 
 on F^2^ are statistically about twice as large as those based on F, and R- 
 factors based on ALL data will be even larger. 
; 
 
_refine_ls_structure_factor_coef  Fsqd  
_refine_ls_matrix_type            full 
_refine_ls_weighting_scheme       calc  
_refine_ls_weighting_details 
 'calc w=1/[\s^2^(Fo^2^)+(0.0382P)^2^+1.4654P] where P=(Fo^2^+2Fc^2^)/3' 
_atom_sites_solution_primary      direct 
_atom_sites_solution_secondary    difmap 
_atom_sites_solution_hydrogens    geom 
_refine_ls_hydrogen_treatment     constr 
_refine_ls_extinction_method      SHELXL 
_refine_ls_extinction_coef        0.0074(9) 
_refine_ls_extinction_expression 
 'Fc^*^=kFc[1+0.001xFc^2^\l^3^/sin(2\q)]^-1/4^' 
_refine_ls_number_reflns          5903 
_refine_ls_number_parameters      341 
_refine_ls_number_restraints      19 
_refine_ls_R_factor_all           0.0589 
_refine_ls_R_factor_gt            0.0418 
_refine_ls_wR_factor_ref          0.1023 
_refine_ls_wR_factor_gt           0.0949 
_refine_ls_goodness_of_fit_ref    1.087 
_refine_ls_restrained_S_all       1.086 
_refine_ls_shift/su_max           0.000 
_refine_ls_shift/su_mean          0.000 
 
loop_ 
 _atom_site_label 
 _atom_site_type_symbol 
 _atom_site_fract_x 
 _atom_site_fract_y 
 _atom_site_fract_z 
 _atom_site_U_iso_or_equiv 
 _atom_site_adp_type 
 _atom_site_occupancy 
 _atom_site_symmetry_multiplicity 
 _atom_site_calc_flag 
 _atom_site_refinement_flags 
 _atom_site_disorder_assembly 
 _atom_site_disorder_group 
Ni1 Ni 0.34521(4) 0.13746(4) 0.32093(2) 0.02957(12) Uani 1 1 d . . . 
Br1 Br 0.61591(4) 0.16731(3) 0.38811(2) 0.04431(13) Uani 1 1 d . . . 
N1 N 0.4127(3) 0.4649(3) 0.37766(16) 0.0381(6) Uani 1 1 d . . . 
N2 N 0.5408(3) 0.4387(3) 0.28166(17) 0.0412(6) Uani 1 1 d . . . 
N3 N 0.1388(3) -0.1516(3) 0.36846(15) 0.0333(5) Uani 1 1 d . . . 
N4 N 0.2293(3) -0.2012(3) 0.26306(15) 0.0340(5) Uani 1 1 d . . . 
C1 C 0.4367(4) 0.3559(3) 0.32663(18) 0.0330(6) Uani 1 1 d . . . 
C2 C 0.5023(4) 0.6146(3) 0.3652(2) 0.0441(8) Uani 1 1 d . . . 
C3 C 0.5823(4) 0.5984(4) 0.3054(2) 0.0491(9) Uani 1 1 d . . . 
C4 C 0.3013(4) 0.4286(4) 0.4352(2) 0.0444(8) Uani 1 1 d . . . 
H4A H 0.1864 0.4116 0.4117 0.067 Uiso 1 1 calc R . . 
H4B H 0.3474 0.5158 0.4819 0.067 Uiso 1 1 calc R . . 
H4C H 0.2950 0.3338 0.4510 0.067 Uiso 1 1 calc R . . 
C5 C 0.5039(5) 0.7573(4) 0.4145(3) 0.0637(12) Uani 1 1 d . . . 
H5A H 0.5739 0.8492 0.3954 0.096 Uiso 1 1 calc R . . 
H5B H 0.5522 0.7700 0.4698 0.096 Uiso 1 1 calc R . . 
H5C H 0.3865 0.7464 0.4106 0.096 Uiso 1 1 calc R . . 
C6 C 0.6958(5) 0.7163(5) 0.2649(3) 0.0706(13) Uani 1 1 d . . . 
H6A H 0.7074 0.8202 0.2889 0.106 Uiso 1 1 calc R . . 
H6B H 0.6451 0.6886 0.2085 0.106 Uiso 1 1 calc R . . 
H6C H 0.8090 0.7172 0.2707 0.106 Uiso 1 1 calc R . . 
C7 C 0.6066(5) 0.3701(4) 0.2209(2) 0.0537(9) Uani 1 1 d . . . 
H7A H 0.5804 0.2626 0.2244 0.081 Uiso 1 1 calc R . . 
H7B H 0.7309 0.4316 0.2285 0.081 Uiso 1 1 calc R . . 
H7C H 0.5528 0.3696 0.1687 0.081 Uiso 1 1 calc R . . 
C8 C 0.2341(3) -0.0810(3) 0.31744(18) 0.0305(6) Uani 1 1 d . . . 
C9 C 0.0764(4) -0.3137(3) 0.3465(2) 0.0379(7) Uani 1 1 d . . . 
C10 C 0.1326(4) -0.3455(3) 0.2803(2) 0.0380(7) Uani 1 1 d . . . 
C11 C 0.1090(4) -0.0678(4) 0.4381(2) 0.0428(7) Uani 1 1 d . . . 
H11A H 0.1617 0.0443 0.4396 0.064 Uiso 1 1 calc R . . 
H11B H 0.1598 -0.0863 0.4857 0.064 Uiso 1 1 calc R . . 
H11C H -0.0145 -0.1050 0.4358 0.064 Uiso 1 1 calc R . . 
C12 C -0.0290(4) -0.4174(4) 0.3953(2) 0.0506(9) Uani 1 1 d . . . 
H12A H -0.0679 -0.5271 0.3687 0.076 Uiso 1 1 calc R . . 
H12B H -0.1287 -0.3972 0.4017 0.076 Uiso 1 1 calc R . . 
H12C H 0.0406 -0.3956 0.4475 0.076 Uiso 1 1 calc R . . 
C13 C 0.1113(5) -0.4963(4) 0.2307(2) 0.0517(9) Uani 1 1 d . . . 
H13A H 0.0459 -0.5825 0.2546 0.078 Uiso 1 1 calc R . . 
H13B H 0.2242 -0.4928 0.2276 0.078 Uiso 1 1 calc R . . 
H13C H 0.0497 -0.5127 0.1773 0.078 Uiso 1 1 calc R . . 
C14 C 0.3196(5) -0.1796(4) 0.1974(2) 0.0477(8) Uani 1 1 d . . . 
H14A H 0.3950 -0.0682 0.2039 0.072 Uiso 1 1 calc R . . 
H14B H 0.2366 -0.2177 0.1477 0.072 Uiso 1 1 calc R . . 
H14C H 0.3883 -0.2381 0.1964 0.072 Uiso 1 1 calc R . . 
C15 C 0.1489(4) 0.1144(3) 0.25301(18) 0.0344(6) Uani 1 1 d . . . 
C16 C 0.1566(5) 0.1070(5) 0.1725(2) 0.0525(9) Uani 1 1 d . . . 
H16 H 0.2587 0.1140 0.1551 0.063 Uiso 1 1 calc R . . 
C17 C 0.0199(5) 0.0897(5) 0.1178(2) 0.0593(10) Uani 1 1 d . . . 
H17 H 0.0291 0.0852 0.0637 0.071 Uiso 1 1 calc R . . 
C18 C -0.1302(4) 0.0791(4) 0.1417(2) 0.0447(8) Uani 1 1 d . C . 
C19 C -0.1411(4) 0.0882(3) 0.22074(19) 0.0364(7) Uani 1 1 d . . . 
H19 H -0.2429 0.0824 0.2380 0.044 Uiso 1 1 calc R . . 
C20 C -0.0027(4) 0.1057(3) 0.27476(19) 0.0355(7) Uani 1 1 d . . . 
H20 H -0.0122 0.1121 0.3289 0.043 Uiso 1 1 calc R . . 
C21 C -0.2755(6) 0.0639(6) 0.0822(3) 0.0673(12) Uani 1 1 d . . . 
C22 C 0.911(3) 0.640(3) 0.0340(15) 0.191(9) Uiso 0.50 1 d P A 1 
H22A H 1.0002 0.6714 0.0016 0.286 Uiso 0.50 1 calc PR A 1 
H22B H 0.9176 0.5578 0.0586 0.286 Uiso 0.50 1 calc PR A 1 
H22C H 0.9297 0.7304 0.0752 0.286 Uiso 0.50 1 calc PR A 1 
C23 C 0.738(2) 0.579(3) -0.0176(12) 0.143(6) Uiso 0.50 1 d PD A 1 
H23A H 0.7241 0.4900 -0.0598 0.172 Uiso 0.50 1 calc PR A 1 
H23B H 0.7367 0.6621 -0.0438 0.172 Uiso 0.50 1 calc PR A 1 
C24 C 0.5785(15) 0.5236(18) 0.0231(8) 0.107(4) Uiso 0.50 1 d PD . 1 
H24A H 0.5754 0.4359 0.0464 0.128 Uiso 0.50 1 calc PR . 1 
H24B H 0.5957 0.6104 0.0675 0.128 Uiso 0.50 1 calc PR . 1 
O1 O 0.824(5) 0.702(3) 0.052(2) 0.51(3) Uiso 0.50 1 d PD B 2 
C25 C 0.653(5) 0.639(5) 0.009(3) 0.67(7) Uiso 0.50 1 d PD B 2 
H25A H 0.6329 0.7172 -0.0155 0.800 Uiso 0.50 1 calc PR B 2 
H25B H 0.5676 0.5994 0.0426 0.800 Uiso 0.50 1 calc PR B 2 
C26 C 0.645(4) 0.503(3) -0.0559(14) 0.239(13) Uiso 0.50 1 d PD B 2 
H26A H 0.5266 0.4253 -0.0802 0.286 Uiso 0.50 1 calc PR B 2 
H26B H 0.7103 0.5405 -0.0975 0.286 Uiso 0.50 1 calc PR B 2 
C27 C 0.736(5) 0.440(3) 0.000(2) 0.37(2) Uiso 0.50 1 d PD B 2 
H27A H 0.8021 0.3943 -0.0292 0.439 Uiso 0.50 1 calc PR B 2 
H27B H 0.6508 0.3580 0.0208 0.439 Uiso 0.50 1 calc PR B 2 
C28 C 0.860(3) 0.579(4) 0.0699(16) 0.223(12) Uiso 0.50 1 d PD B 2 
H28A H 0.8330 0.5588 0.1218 0.267 Uiso 0.50 1 calc PR B 2 
H28B H 0.9816 0.6022 0.0694 0.267 Uiso 0.50 1 calc PR B 2 
F1 F -0.2780(17) 0.0064(16) 0.0086(6) 0.097(4) Uani 0.621(19) 1 d PDU C 1 
F2 F -0.2563(12) 0.2174(8) 0.0765(5) 0.091(2) Uani 0.621(19) 1 d PD C 1 
F3 F -0.4219(6) 0.0042(16) 0.0992(4) 0.085(4) Uani 0.621(19) 1 d PD C 1 
F1' F -0.258(2) 0.040(3) 0.0137(9) 0.110(8) Uani 0.379(19) 1 d PDU C 2 
F2' F -0.358(3) 0.134(3) 0.1025(8) 0.121(11) Uani 0.379(19) 1 d PD C 2 
F3' F -0.4197(12) -0.105(2) 0.0773(7) 0.100(5) Uani 0.379(19) 1 d PD C 2 
 
loop_ 
 _atom_site_aniso_label 
 _atom_site_aniso_U_11 
 _atom_site_aniso_U_22 
 _atom_site_aniso_U_33 
 _atom_site_aniso_U_23 
 _atom_site_aniso_U_13 
 _atom_site_aniso_U_12 
Ni1 0.02701(19) 0.01686(18) 0.0406(2) 0.00598(14) 0.00048(15) 0.00709(14) 
Br1 0.03237(18) 0.02811(17) 0.0660(2) 0.01773(15) -0.00500(14) 0.00778(13) 
N1 0.0362(13) 0.0200(11) 0.0500(16) 0.0038(11) -0.0101(11) 0.0103(10) 
N2 0.0339(14) 0.0285(13) 0.0576(17) 0.0186(12) 0.0003(12) 0.0089(11) 
N3 0.0279(12) 0.0224(11) 0.0451(15) 0.0089(10) 0.0028(10) 0.0074(9) 
N4 0.0305(12) 0.0201(11) 0.0457(15) 0.0049(10) 0.0020(11) 0.0077(10) 
C1 0.0299(14) 0.0223(13) 0.0415(17) 0.0081(12) -0.0039(12) 0.0084(11) 
C2 0.0380(17) 0.0209(14) 0.062(2) 0.0087(14) -0.0163(16) 0.0081(13) 
C3 0.0339(17) 0.0238(15) 0.076(3) 0.0217(16) -0.0136(17) 0.0016(13) 
C4 0.0464(19) 0.0335(16) 0.051(2) 0.0009(15) -0.0015(15) 0.0210(15) 
C5 0.063(2) 0.0225(16) 0.089(3) -0.0001(17) -0.030(2) 0.0168(16) 
C6 0.048(2) 0.047(2) 0.110(4) 0.048(2) -0.001(2) 0.0058(17) 
C7 0.045(2) 0.054(2) 0.065(2) 0.0289(19) 0.0153(17) 0.0178(17) 
C8 0.0253(13) 0.0211(13) 0.0410(16) 0.0039(11) -0.0014(11) 0.0093(11) 
C9 0.0289(15) 0.0229(14) 0.053(2) 0.0117(13) -0.0037(13) 0.0045(11) 
C10 0.0347(15) 0.0187(13) 0.0515(19) 0.0048(13) -0.0066(14) 0.0075(11) 
C11 0.0438(18) 0.0393(17) 0.0442(19) 0.0105(15) 0.0096(14) 0.0166(15) 
C12 0.0403(18) 0.0349(17) 0.070(2) 0.0224(17) 0.0031(17) 0.0078(14) 
C13 0.050(2) 0.0238(15) 0.067(2) -0.0011(15) -0.0076(17) 0.0118(14) 
C14 0.053(2) 0.0347(17) 0.055(2) 0.0052(15) 0.0160(16) 0.0184(15) 
C15 0.0369(16) 0.0183(13) 0.0410(17) 0.0039(12) -0.0006(13) 0.0081(11) 
C16 0.0411(19) 0.070(3) 0.046(2) 0.0015(18) 0.0025(15) 0.0299(18) 
C17 0.052(2) 0.088(3) 0.039(2) 0.0011(19) 0.0003(16) 0.038(2) 
C18 0.0363(17) 0.0450(19) 0.0444(19) -0.0004(15) -0.0050(14) 0.0166(15) 
C19 0.0295(15) 0.0266(14) 0.0501(19) 0.0106(13) 0.0040(13) 0.0095(12) 
C20 0.0349(16) 0.0233(14) 0.0431(17) 0.0098(12) -0.0002(13) 0.0088(12) 
C21 0.053(3) 0.096(4) 0.052(3) 0.004(2) -0.0054(19) 0.041(3) 
F1 0.086(7) 0.144(6) 0.050(5) -0.032(4) -0.023(4) 0.068(5) 
F2 0.078(4) 0.085(4) 0.108(5) 0.033(4) -0.023(3) 0.041(3) 
F3 0.032(2) 0.138(8) 0.076(5) 0.042(6) 0.000(2) 0.026(4) 
F1' 0.051(6) 0.25(2) 0.038(8) 0.056(10) 0.000(5) 0.069(10) 
F2' 0.128(17) 0.171(18) 0.081(8) -0.038(12) -0.050(10) 0.124(17) 
F3' 0.050(5) 0.113(11) 0.100(7) 0.020(7) -0.024(4) 0.011(5) 
 
_geom_special_details 
; 
 All esds (except the esd in the dihedral angle between two l.s. planes) 
 are estimated using the full covariance matrix.  The cell esds are taken 
 into account individually in the estimation of esds in distances, angles 
 and torsion angles; correlations between esds in cell parameters are only 
 used when they are defined by crystal symmetry.  An approximate (isotropic) 
 treatment of cell esds is used for estimating esds involving l.s. planes. 
; 
 
loop_ 
 _geom_bond_atom_site_label_1 
 _geom_bond_atom_site_label_2 
 _geom_bond_distance 
 _geom_bond_site_symmetry_2 
 _geom_bond_publ_flag 
Ni1 C15 1.892(3) . ? 
Ni1 C1 1.901(3) . ? 
Ni1 C8 1.909(3) . ? 
Ni1 Br1 2.4097(5) . ? 
N1 C1 1.362(4) . ? 
N1 C2 1.396(4) . ? 
N1 C4 1.452(4) . ? 
N2 C1 1.353(4) . ? 
N2 C3 1.405(4) . ? 
N2 C7 1.449(5) . ? 
N3 C8 1.352(4) . ? 
N3 C9 1.395(4) . ? 
N3 C11 1.453(4) . ? 
N4 C8 1.355(4) . ? 
N4 C10 1.400(4) . ? 
N4 C14 1.450(4) . ? 
C2 C3 1.336(6) . ? 
C2 C5 1.493(5) . ? 
C3 C6 1.500(5) . ? 
C4 H4A 0.9800 . ? 
C4 H4B 0.9800 . ? 
C4 H4C 0.9800 . ? 
C5 H5A 0.9800 . ? 
C5 H5B 0.9800 . ? 
C5 H5C 0.9800 . ? 
C6 H6A 0.9800 . ? 
C6 H6B 0.9800 . ? 
C6 H6C 0.9800 . ? 
C7 H7A 0.9800 . ? 
C7 H7B 0.9800 . ? 
C7 H7C 0.9800 . ? 
C9 C10 1.339(5) . ? 
C9 C12 1.501(4) . ? 
C10 C13 1.493(4) . ? 
C11 H11A 0.9800 . ? 
C11 H11B 0.9800 . ? 
C11 H11C 0.9800 . ? 
C12 H12A 0.9800 . ? 
C12 H12B 0.9800 . ? 
C12 H12C 0.9800 . ? 
C13 H13A 0.9800 . ? 
C13 H13B 0.9800 . ? 
C13 H13C 0.9800 . ? 
C14 H14A 0.9800 . ? 
C14 H14B 0.9800 . ? 
C14 H14C 0.9800 . ? 
C15 C20 1.387(4) . ? 
C15 C16 1.404(5) . ? 
C16 C17 1.385(5) . ? 
C16 H16 0.9500 . ? 
C17 C18 1.384(5) . ? 
C17 H17 0.9500 . ? 
C18 C19 1.383(5) . ? 
C18 C21 1.496(5) . ? 
C19 C20 1.387(4) . ? 
C19 H19 0.9500 . ? 
C20 H20 0.9500 . ? 
C21 F2' 1.212(9) . ? 
C21 F1' 1.217(15) . ? 
C21 F3 1.256(7) . ? 
C21 F1 1.306(10) . ? 
C21 F2 1.442(8) . ? 
C21 F3' 1.575(15) . ? 
C22 C23 1.50(3) . ? 
C22 H22A 0.9800 . ? 
C22 H22B 0.9800 . ? 
C22 H22C 0.9800 . ? 
C23 C24 1.562(15) . ? 
C23 H23A 0.9900 . ? 
C23 H23B 0.9900 . ? 
C24 C24 1.37(2) 2_665 ? 
C24 H24A 0.9900 . ? 
C24 H24B 0.9900 . ? 
O1 C28 1.419(18) . ? 
O1 C25 1.428(19) . ? 
C25 C26 1.554(19) . ? 
C25 H25A 0.9900 . ? 
C25 H25B 0.9900 . ? 
C26 C27 1.543(18) . ? 
C26 H26A 0.9900 . ? 
C26 H26B 0.9900 . ? 
C27 C28 1.565(18) . ? 
C27 H27A 0.9900 . ? 
C27 H27B 0.9900 . ? 
C28 H28A 0.9900 . ? 
C28 H28B 0.9900 . ? 
 
loop_ 
 _geom_angle_atom_site_label_1 
 _geom_angle_atom_site_label_2 
 _geom_angle_atom_site_label_3 
 _geom_angle 
 _geom_angle_site_symmetry_1 
 _geom_angle_site_symmetry_3 
 _geom_angle_publ_flag 
C15 Ni1 C1 87.71(12) . . ? 
C15 Ni1 C8 88.79(12) . . ? 
C1 Ni1 C8 174.61(12) . . ? 
C15 Ni1 Br1 170.53(10) . . ? 
C1 Ni1 Br1 90.98(8) . . ? 
C8 Ni1 Br1 93.14(8) . . ? 
C1 N1 C2 111.5(3) . . ? 
C1 N1 C4 124.1(2) . . ? 
C2 N1 C4 124.4(3) . . ? 
C1 N2 C3 110.8(3) . . ? 
C1 N2 C7 123.4(3) . . ? 
C3 N2 C7 125.7(3) . . ? 
C8 N3 C9 111.5(3) . . ? 
C8 N3 C11 123.9(2) . . ? 
C9 N3 C11 124.7(3) . . ? 
C8 N4 C10 111.6(3) . . ? 
C8 N4 C14 123.3(2) . . ? 
C10 N4 C14 125.1(3) . . ? 
N2 C1 N1 104.3(2) . . ? 
N2 C1 Ni1 128.2(2) . . ? 
N1 C1 Ni1 127.5(2) . . ? 
C3 C2 N1 106.3(3) . . ? 
C3 C2 C5 130.7(3) . . ? 
N1 C2 C5 123.0(4) . . ? 
C2 C3 N2 107.2(3) . . ? 
C2 C3 C6 131.2(4) . . ? 
N2 C3 C6 121.6(4) . . ? 
N1 C4 H4A 109.5 . . ? 
N1 C4 H4B 109.5 . . ? 
H4A C4 H4B 109.5 . . ? 
N1 C4 H4C 109.5 . . ? 
H4A C4 H4C 109.5 . . ? 
H4B C4 H4C 109.5 . . ? 
C2 C5 H5A 109.5 . . ? 
C2 C5 H5B 109.5 . . ? 
H5A C5 H5B 109.5 . . ? 
C2 C5 H5C 109.5 . . ? 
H5A C5 H5C 109.5 . . ? 
H5B C5 H5C 109.5 . . ? 
C3 C6 H6A 109.5 . . ? 
C3 C6 H6B 109.5 . . ? 
H6A C6 H6B 109.5 . . ? 
C3 C6 H6C 109.5 . . ? 
H6A C6 H6C 109.5 . . ? 
H6B C6 H6C 109.5 . . ? 
N2 C7 H7A 109.5 . . ? 
N2 C7 H7B 109.5 . . ? 
H7A C7 H7B 109.5 . . ? 
N2 C7 H7C 109.5 . . ? 
H7A C7 H7C 109.5 . . ? 
H7B C7 H7C 109.5 . . ? 
N3 C8 N4 104.0(2) . . ? 
N3 C8 Ni1 127.6(2) . . ? 
N4 C8 Ni1 128.4(2) . . ? 
C10 C9 N3 106.9(3) . . ? 
C10 C9 C12 131.8(3) . . ? 
N3 C9 C12 121.3(3) . . ? 
C9 C10 N4 106.2(3) . . ? 
C9 C10 C13 131.6(3) . . ? 
N4 C10 C13 122.2(3) . . ? 
N3 C11 H11A 109.5 . . ? 
N3 C11 H11B 109.5 . . ? 
H11A C11 H11B 109.5 . . ? 
N3 C11 H11C 109.5 . . ? 
H11A C11 H11C 109.5 . . ? 
H11B C11 H11C 109.5 . . ? 
C9 C12 H12A 109.5 . . ? 
C9 C12 H12B 109.5 . . ? 
H12A C12 H12B 109.5 . . ? 
C9 C12 H12C 109.5 . . ? 
H12A C12 H12C 109.5 . . ? 
H12B C12 H12C 109.5 . . ? 
C10 C13 H13A 109.5 . . ? 
C10 C13 H13B 109.5 . . ? 
H13A C13 H13B 109.5 . . ? 
C10 C13 H13C 109.5 . . ? 
H13A C13 H13C 109.5 . . ? 
H13B C13 H13C 109.5 . . ? 
N4 C14 H14A 109.5 . . ? 
N4 C14 H14B 109.5 . . ? 
H14A C14 H14B 109.5 . . ? 
N4 C14 H14C 109.5 . . ? 
H14A C14 H14C 109.5 . . ? 
H14B C14 H14C 109.5 . . ? 
C20 C15 C16 116.2(3) . . ? 
C20 C15 Ni1 126.5(2) . . ? 
C16 C15 Ni1 117.3(2) . . ? 
C17 C16 C15 121.9(3) . . ? 
C17 C16 H16 119.0 . . ? 
C15 C16 H16 119.0 . . ? 
C18 C17 C16 120.1(4) . . ? 
C18 C17 H17 119.9 . . ? 
C16 C17 H17 119.9 . . ? 
C19 C18 C17 119.4(3) . . ? 
C19 C18 C21 121.1(3) . . ? 
C17 C18 C21 119.5(4) . . ? 
C18 C19 C20 119.7(3) . . ? 
C18 C19 H19 120.1 . . ? 
C20 C19 H19 120.1 . . ? 
C19 C20 C15 122.7(3) . . ? 
C19 C20 H20 118.7 . . ? 
C15 C20 H20 118.7 . . ? 
F2' C21 F1' 120.5(11) . . ? 
F2' C21 F3 54.3(10) . . ? 
F1' C21 F3 120.1(10) . . ? 
F2' C21 F1 124.3(9) . . ? 
F1' C21 F1 12.6(15) . . ? 
F3 C21 F1 111.2(7) . . ? 
F2' C21 F2 49.0(12) . . ? 
F1' C21 F2 88.9(11) . . ? 
F3 C21 F2 101.9(6) . . ? 
F1 C21 F2 99.8(7) . . ? 
F2' C21 C18 117.9(5) . . ? 
F1' C21 C18 114.7(9) . . ? 
F3 C21 C18 116.2(5) . . ? 
F1 C21 C18 115.9(6) . . ? 
F2 C21 C18 109.4(4) . . ? 
F2' C21 F3' 96.4(11) . . ? 
F1' C21 F3' 96.3(11) . . ? 
F3 C21 F3' 42.4(5) . . ? 
F1 C21 F3' 83.9(8) . . ? 
F2 C21 F3' 140.3(6) . . ? 
C18 C21 F3' 103.9(6) . . ? 
C23 C22 H22A 109.5 . . ? 
C23 C22 H22B 109.5 . . ? 
H22A C22 H22B 109.5 . . ? 
C23 C22 H22C 109.5 . . ? 
H22A C22 H22C 109.5 . . ? 
H22B C22 H22C 109.5 . . ? 
C22 C23 C24 117.4(18) . . ? 
C22 C23 H23A 107.9 . . ? 
C24 C23 H23A 107.9 . . ? 
C22 C23 H23B 107.9 . . ? 
C24 C23 H23B 107.9 . . ? 
H23A C23 H23B 107.2 . . ? 
C24 C24 C23 117.3(16) 2_665 . ? 
C24 C24 H24A 108.0 2_665 . ? 
C23 C24 H24A 108.0 . . ? 
C24 C24 H24B 108.0 2_665 . ? 
C23 C24 H24B 108.0 . . ? 
H24A C24 H24B 107.2 . . ? 
C28 O1 C25 109.9(17) . . ? 
O1 C25 C26 102.1(17) . . ? 
O1 C25 H25A 111.3 . . ? 
C26 C25 H25A 111.3 . . ? 
O1 C25 H25B 111.3 . . ? 
C26 C25 H25B 111.3 . . ? 
H25A C25 H25B 109.2 . . ? 
C27 C26 C25 96.1(13) . . ? 
C27 C26 H26A 112.5 . . ? 
C25 C26 H26A 112.5 . . ? 
C27 C26 H26B 112.5 . . ? 
C25 C26 H26B 112.5 . . ? 
H26A C26 H26B 110.0 . . ? 
C26 C27 C28 108.5(13) . . ? 
C26 C27 H27A 110.0 . . ? 
C28 C27 H27A 110.0 . . ? 
C26 C27 H27B 110.0 . . ? 
C28 C27 H27B 110.0 . . ? 
H27A C27 H27B 108.4 . . ? 
O1 C28 C27 100.7(13) . . ? 
O1 C28 H28A 111.6 . . ? 
C27 C28 H28A 111.6 . . ? 
O1 C28 H28B 111.6 . . ? 
C27 C28 H28B 111.6 . . ? 
H28A C28 H28B 109.4 . . ? 
 
loop_ 
 _geom_torsion_atom_site_label_1 
 _geom_torsion_atom_site_label_2 
 _geom_torsion_atom_site_label_3 
 _geom_torsion_atom_site_label_4 
 _geom_torsion 
 _geom_torsion_site_symmetry_1 
 _geom_torsion_site_symmetry_2 
 _geom_torsion_site_symmetry_3 
 _geom_torsion_site_symmetry_4 
 _geom_torsion_publ_flag 
C3 N2 C1 N1 0.6(3) . . . . ? 
C7 N2 C1 N1 177.2(3) . . . . ? 
C3 N2 C1 Ni1 -179.0(2) . . . . ? 
C7 N2 C1 Ni1 -2.5(4) . . . . ? 
C2 N1 C1 N2 -0.6(3) . . . . ? 
C4 N1 C1 N2 176.7(3) . . . . ? 
C2 N1 C1 Ni1 179.0(2) . . . . ? 
C4 N1 C1 Ni1 -3.6(4) . . . . ? 
C15 Ni1 C1 N2 -93.3(3) . . . . ? 
C8 Ni1 C1 N2 -142.9(12) . . . . ? 
Br1 Ni1 C1 N2 77.3(3) . . . . ? 
C15 Ni1 C1 N1 87.0(3) . . . . ? 
C8 Ni1 C1 N1 37.5(15) . . . . ? 
Br1 Ni1 C1 N1 -102.3(2) . . . . ? 
C1 N1 C2 C3 0.4(3) . . . . ? 
C4 N1 C2 C3 -176.9(3) . . . . ? 
C1 N1 C2 C5 -177.9(3) . . . . ? 
C4 N1 C2 C5 4.8(5) . . . . ? 
N1 C2 C3 N2 0.0(3) . . . . ? 
C5 C2 C3 N2 178.1(3) . . . . ? 
N1 C2 C3 C6 179.3(3) . . . . ? 
C5 C2 C3 C6 -2.6(6) . . . . ? 
C1 N2 C3 C2 -0.4(4) . . . . ? 
C7 N2 C3 C2 -176.9(3) . . . . ? 
C1 N2 C3 C6 -179.8(3) . . . . ? 
C7 N2 C3 C6 3.7(5) . . . . ? 
C9 N3 C8 N4 0.4(3) . . . . ? 
C11 N3 C8 N4 179.2(3) . . . . ? 
C9 N3 C8 Ni1 179.4(2) . . . . ? 
C11 N3 C8 Ni1 -1.8(4) . . . . ? 
C10 N4 C8 N3 -0.3(3) . . . . ? 
C14 N4 C8 N3 -178.1(3) . . . . ? 
C10 N4 C8 Ni1 -179.3(2) . . . . ? 
C14 N4 C8 Ni1 2.9(4) . . . . ? 
C15 Ni1 C8 N3 -93.3(3) . . . . ? 
C1 Ni1 C8 N3 -43.8(14) . . . . ? 
Br1 Ni1 C8 N3 96.0(2) . . . . ? 
C15 Ni1 C8 N4 85.4(3) . . . . ? 
C1 Ni1 C8 N4 135.0(13) . . . . ? 
Br1 Ni1 C8 N4 -85.3(2) . . . . ? 
C8 N3 C9 C10 -0.3(3) . . . . ? 
C11 N3 C9 C10 -179.2(3) . . . . ? 
C8 N3 C9 C12 178.3(3) . . . . ? 
C11 N3 C9 C12 -0.5(4) . . . . ? 
N3 C9 C10 N4 0.1(3) . . . . ? 
C12 C9 C10 N4 -178.3(3) . . . . ? 
N3 C9 C10 C13 178.3(3) . . . . ? 
C12 C9 C10 C13 -0.1(6) . . . . ? 
C8 N4 C10 C9 0.1(3) . . . . ? 
C14 N4 C10 C9 177.9(3) . . . . ? 
C8 N4 C10 C13 -178.3(3) . . . . ? 
C14 N4 C10 C13 -0.5(5) . . . . ? 
C1 Ni1 C15 C20 -96.1(3) . . . . ? 
C8 Ni1 C15 C20 79.8(3) . . . . ? 
Br1 Ni1 C15 C20 -178.3(3) . . . . ? 
C1 Ni1 C15 C16 83.2(3) . . . . ? 
C8 Ni1 C15 C16 -100.9(3) . . . . ? 
Br1 Ni1 C15 C16 1.0(7) . . . . ? 
C20 C15 C16 C17 -0.9(5) . . . . ? 
Ni1 C15 C16 C17 179.8(3) . . . . ? 
C15 C16 C17 C18 -0.1(6) . . . . ? 
C16 C17 C18 C19 0.9(6) . . . . ? 
C16 C17 C18 C21 178.7(4) . . . . ? 
C17 C18 C19 C20 -0.8(5) . . . . ? 
C21 C18 C19 C20 -178.6(3) . . . . ? 
C18 C19 C20 C15 -0.2(4) . . . . ? 
C16 C15 C20 C19 1.0(4) . . . . ? 
Ni1 C15 C20 C19 -179.7(2) . . . . ? 
C19 C18 C21 F2' 36.5(18) . . . . ? 
C17 C18 C21 F2' -141.3(17) . . . . ? 
C19 C18 C21 F1' -172.4(13) . . . . ? 
C17 C18 C21 F1' 9.9(14) . . . . ? 
C19 C18 C21 F3 -25.1(9) . . . . ? 
C17 C18 C21 F3 157.2(8) . . . . ? 
C19 C18 C21 F1 -158.5(8) . . . . ? 
C17 C18 C21 F1 23.8(9) . . . . ? 
C19 C18 C21 F2 89.6(6) . . . . ? 
C17 C18 C21 F2 -88.1(7) . . . . ? 
C19 C18 C21 F3' -68.6(8) . . . . ? 
C17 C18 C21 F3' 113.7(8) . . . . ? 
C22 C23 C24 C24 176(2) . . . 2_665 ? 
C28 O1 C25 C26 -48(4) . . . . ? 
O1 C25 C26 C27 44(3) . . . . ? 
C25 C26 C27 C28 -28(4) . . . . ? 
C25 O1 C28 C27 27(4) . . . . ? 
C26 C27 C28 O1 3(4) . . . . ? 
 
_diffrn_measured_fraction_theta_max    0.992 
_diffrn_reflns_theta_full              27.50 
_diffrn_measured_fraction_theta_full   0.992 
_refine_diff_density_max    0.700 
_refine_diff_density_min   -0.837 
_refine_diff_density_rms    0.070 

#===END

 
data_tmiy2Ni(II)MeOPhBr 
 
_audit_creation_method            SHELXL-97 
_chemical_name_systematic 
; 
 ? 
; 
_chemical_name_common             ? 
_chemical_melting_point           ? 
_chemical_formula_moiety          'C21 H31 Br N4 Ni O'  
_chemical_formula_sum 
 'C21 H31 Br N4 Ni O' 
_chemical_formula_weight          494.12 
 
loop_ 
 _atom_type_symbol 
 _atom_type_description 
 _atom_type_scat_dispersion_real 
 _atom_type_scat_dispersion_imag 
 _atom_type_scat_source 
 'C'  'C'   0.0033   0.0016 
 'International Tables Vol C Tables 4.2.6.8 and 6.1.1.4' 
 'H'  'H'   0.0000   0.0000 
 'International Tables Vol C Tables 4.2.6.8 and 6.1.1.4' 
 'N'  'N'   0.0061   0.0033 
 'International Tables Vol C Tables 4.2.6.8 and 6.1.1.4' 
 'O'  'O'   0.0106   0.0060 
 'International Tables Vol C Tables 4.2.6.8 and 6.1.1.4' 
 'Ni'  'Ni'   0.3393   1.1124 
 'International Tables Vol C Tables 4.2.6.8 and 6.1.1.4' 
 'Br'  'Br'  -0.2901   2.4595 
 'International Tables Vol C Tables 4.2.6.8 and 6.1.1.4' 
 
_symmetry_cell_setting            monoclinic 
_symmetry_space_group_name_H-M    P21/n 
_symmetry_space_group_name_Hall    '-P 2yn' 
 
loop_ 
 _symmetry_equiv_pos_as_xyz 
 'x, y, z' 
 '-x+1/2, y+1/2, -z+1/2' 
 '-x, -y, -z' 
 'x-1/2, -y-1/2, z-1/2' 
 
_cell_length_a                    9.01950(10) 
_cell_length_b                    27.5695(4) 
_cell_length_c                    9.47800(10) 
_cell_angle_alpha                 90.00 
_cell_angle_beta                  112.0432(9) 
_cell_angle_gamma                 90.00 
_cell_volume                      2184.55(5) 
_cell_formula_units_Z             4 
_cell_measurement_temperature     150(1) 
_cell_measurement_reflns_used     8566
_cell_measurement_theta_min       1.018 
_cell_measurement_theta_max       27.485 
 
_exptl_crystal_description        prism 
_exptl_crystal_colour             brown 
_exptl_crystal_size_max           0.35 
_exptl_crystal_size_mid           0.30 
_exptl_crystal_size_min           0.23 
_exptl_crystal_density_meas       ? 
_exptl_crystal_density_diffrn     1.502 
_exptl_crystal_density_method     'not measured' 
_exptl_crystal_F_000              1024 
_exptl_absorpt_coefficient_mu     2.736 
_exptl_absorpt_correction_type    'Multi-scan' 
_exptl_absorpt_correction_T_min   0.4477 
_exptl_absorpt_correction_T_max   0.5718 
_exptl_absorpt_process_details    'DENZO-SMN (Otwinowski & Minor, 1997)' 
 
_exptl_special_details 
; 
  The program Denzo-SMN (Otwinowski & Minor, 1997) uses a scaling
 algorithm (Fox & Holmes, 1966) which effectively corrects for
 absorption effects. High redundancy data were used in the scaling
 program hence the 'multi-scan' code word was used. No transmission
 coefficients are available from the program (only scale factors for each
 frame). The scale factors in the experimental table are calculated
 from the 'size' command in the SHELXL-97 input file. 
; 
 
_diffrn_ambient_temperature       150(1) 
_diffrn_radiation_wavelength      0.71073 
_diffrn_radiation_type            MoK\a 
_diffrn_radiation_source          'fine-focus sealed tube' 
_diffrn_radiation_monochromator   graphite 
_diffrn_measurement_device_type   'Nonius KappaCCD Diffractometer' 
_diffrn_measurement_method        'Phi and Omega scan' 
_diffrn_detector_area_resol_mean  ? 
_diffrn_standards_number          ? 
_diffrn_standards_interval_count  ? 
_diffrn_standards_interval_time   ? 
_diffrn_standards_decay_%         ? 
_diffrn_reflns_number             10194 
_diffrn_reflns_av_R_equivalents   0.0205 
_diffrn_reflns_av_sigmaI/netI     0.0280 
_diffrn_reflns_limit_h_min        -11 
_diffrn_reflns_limit_h_max        11 
_diffrn_reflns_limit_k_min        -36 
_diffrn_reflns_limit_k_max        36 
_diffrn_reflns_limit_l_min        -12 
_diffrn_reflns_limit_l_max        12 
_diffrn_reflns_theta_min          2.43 
_diffrn_reflns_theta_max          27.86 
_reflns_number_total              5193 
_reflns_number_gt                 4416 
_reflns_threshold_expression      >2sigma(I) 
 
_computing_data_collection        'Nonius COLLECT' 
_computing_cell_refinement        DENZO-SMN 
_computing_data_reduction         DENZO-SMN 
_computing_structure_solution     SIR97  
_computing_structure_refinement   'SHELXL-97 (Sheldrick, 1997)' 
_computing_molecular_graphics     'WinGX, Ortep3' 
_computing_publication_material   ? 
 
_refine_special_details 
; 
 Refinement of F^2^ against ALL reflections.  The weighted R-factor wR and 
 goodness of fit S are based on F^2^, conventional R-factors R are based 
 on F, with F set to zero for negative F^2^. The threshold expression of 
 F^2^ > 2sigma(F^2^) is used only for calculating R-factors(gt) etc. and is 
 not relevant to the choice of reflections for refinement.  R-factors based 
 on F^2^ are statistically about twice as large as those based on F, and R- 
 factors based on ALL data will be even larger. 
; 
 
_refine_ls_structure_factor_coef  Fsqd  
_refine_ls_matrix_type            full 
_refine_ls_weighting_scheme       calc  
_refine_ls_weighting_details 
 'calc w=1/[\s^2^(Fo^2^)+(0.0335P)^2^+1.6821P] where P=(Fo^2^+2Fc^2^)/3' 
_atom_sites_solution_primary      direct 
_atom_sites_solution_secondary    difmap 
_atom_sites_solution_hydrogens    geom 
_refine_ls_hydrogen_treatment     constr 
_refine_ls_extinction_method      none 
_refine_ls_extinction_coef        ? 
_refine_ls_number_reflns          5193 
_refine_ls_number_parameters      262 
_refine_ls_number_restraints      0 
_refine_ls_R_factor_all           0.0392 
_refine_ls_R_factor_gt            0.0296 
_refine_ls_wR_factor_ref          0.0756 
_refine_ls_wR_factor_gt           0.0720 
_refine_ls_goodness_of_fit_ref    1.042 
_refine_ls_restrained_S_all       1.042 
_refine_ls_shift/su_max           0.002 
_refine_ls_shift/su_mean          0.000 
 
loop_ 
 _atom_site_label 
 _atom_site_type_symbol 
 _atom_site_fract_x 
 _atom_site_fract_y 
 _atom_site_fract_z 
 _atom_site_U_iso_or_equiv 
 _atom_site_adp_type 
 _atom_site_occupancy 
 _atom_site_symmetry_multiplicity 
 _atom_site_calc_flag 
 _atom_site_refinement_flags 
 _atom_site_disorder_assembly 
 _atom_site_disorder_group 
Br1 Br 0.76444(3) 0.322376(8) 0.67238(2) 0.03032(7) Uani 1 1 d . . . 
Ni1 Ni 0.52730(3) 0.357919(10) 0.69109(3) 0.02254(8) Uani 1 1 d . . . 
O1 O 0.0470(2) 0.50550(7) 0.7465(2) 0.0464(5) Uani 1 1 d . . . 
N1 N 0.4238(2) 0.39342(7) 0.37538(19) 0.0247(4) Uani 1 1 d . . . 
N2 N 0.3054(2) 0.32772(6) 0.38917(19) 0.0233(4) Uani 1 1 d . . . 
N3 N 0.7295(2) 0.37250(7) 1.01871(19) 0.0260(4) Uani 1 1 d . . . 
N4 N 0.5499(2) 0.31837(6) 0.98200(19) 0.0242(4) Uani 1 1 d . . . 
C1 C 0.4164(2) 0.35975(8) 0.4758(2) 0.0228(4) Uani 1 1 d . . . 
C2 C 0.3189(3) 0.38297(8) 0.2273(2) 0.0270(5) Uani 1 1 d . . . 
C3 C 0.2434(3) 0.34148(8) 0.2356(2) 0.0258(4) Uani 1 1 d . . . 
C4 C 0.5328(3) 0.43427(9) 0.4199(3) 0.0365(5) Uani 1 1 d . . . 
H4A H 0.5839 0.4355 0.5311 0.055 Uiso 1 1 calc R . . 
H4B H 0.4732 0.4644 0.3825 0.055 Uiso 1 1 calc R . . 
H4C H 0.6148 0.4306 0.3761 0.055 Uiso 1 1 calc R . . 
C5 C 0.3107(3) 0.41346(10) 0.0942(3) 0.0402(6) Uani 1 1 d . . . 
H5A H 0.2307 0.4000 0.0010 0.060 Uiso 1 1 calc R . . 
H5B H 0.4155 0.4137 0.0852 0.060 Uiso 1 1 calc R . . 
H5C H 0.2807 0.4467 0.1090 0.060 Uiso 1 1 calc R . . 
C6 C 0.1215(3) 0.31170(9) 0.1157(3) 0.0350(5) Uani 1 1 d . . . 
H6A H 0.0965 0.3270 0.0161 0.052 Uiso 1 1 calc R . . 
H6B H 0.0240 0.3095 0.1380 0.052 Uiso 1 1 calc R . . 
H6C H 0.1641 0.2791 0.1145 0.052 Uiso 1 1 calc R . . 
C7 C 0.2631(3) 0.28341(9) 0.4479(3) 0.0354(5) Uani 1 1 d . . . 
H7A H 0.3369 0.2784 0.5533 0.053 Uiso 1 1 calc R . . 
H7B H 0.2704 0.2559 0.3855 0.053 Uiso 1 1 calc R . . 
H7C H 0.1535 0.2860 0.4447 0.053 Uiso 1 1 calc R . . 
C8 C 0.6083(3) 0.35014(8) 0.9066(2) 0.0241(4) Uani 1 1 d . . . 
C9 C 0.7464(3) 0.35474(8) 1.1627(2) 0.0266(5) Uani 1 1 d . . . 
C10 C 0.6341(3) 0.32052(8) 1.1394(2) 0.0254(4) Uani 1 1 d . . . 
C11 C 0.8313(3) 0.40930(9) 0.9911(3) 0.0333(5) Uani 1 1 d . . . 
H11A H 0.8233 0.4072 0.8853 0.050 Uiso 1 1 calc R . . 
H11B H 0.9425 0.4039 1.0596 0.050 Uiso 1 1 calc R . . 
H11C H 0.7966 0.4415 1.0099 0.050 Uiso 1 1 calc R . . 
C12 C 0.8703(3) 0.37348(10) 1.3067(2) 0.0345(5) Uani 1 1 d . . . 
H12A H 0.8551 0.3585 1.3942 0.052 Uiso 1 1 calc R . . 
H12B H 0.8600 0.4088 1.3114 0.052 Uiso 1 1 calc R . . 
H12C H 0.9770 0.3654 1.3090 0.052 Uiso 1 1 calc R . . 
C13 C 0.5953(3) 0.28766(9) 1.2464(2) 0.0324(5) Uani 1 1 d . . . 
H13A H 0.6641 0.2956 1.3514 0.049 Uiso 1 1 calc R . . 
H13B H 0.6135 0.2539 1.2247 0.049 Uiso 1 1 calc R . . 
H13C H 0.4830 0.2919 1.2331 0.049 Uiso 1 1 calc R . . 
C14 C 0.4100(3) 0.28811(9) 0.9075(3) 0.0312(5) Uani 1 1 d . . . 
H14A H 0.3128 0.3073 0.8876 0.047 Uiso 1 1 calc R . . 
H14B H 0.4110 0.2607 0.9737 0.047 Uiso 1 1 calc R . . 
H14C H 0.4119 0.2759 0.8110 0.047 Uiso 1 1 calc R . . 
C15 C 0.3667(3) 0.39943(8) 0.7094(2) 0.0277(5) Uani 1 1 d . . . 
C16 C 0.2046(3) 0.38958(9) 0.6627(3) 0.0332(5) Uani 1 1 d . . . 
H16 H 0.1672 0.3585 0.6216 0.040 Uiso 1 1 calc R . . 
C17 C 0.0933(3) 0.42353(9) 0.6734(2) 0.0326(5) Uani 1 1 d . . . 
H17 H -0.0168 0.4153 0.6410 0.039 Uiso 1 1 calc R . . 
C18 C 0.1454(3) 0.46891(9) 0.7312(3) 0.0323(5) Uani 1 1 d . . . 
C19 C 0.3057(3) 0.48010(9) 0.7811(3) 0.0328(5) Uani 1 1 d . . . 
H19 H 0.3420 0.5112 0.8227 0.039 Uiso 1 1 calc R . . 
C20 C 0.4136(3) 0.44620(8) 0.7707(3) 0.0301(5) Uani 1 1 d . . . 
H20 H 0.5236 0.4546 0.8061 0.036 Uiso 1 1 calc R . . 
C21 C -0.1200(3) 0.50014(11) 0.6673(3) 0.0479(7) Uani 1 1 d . . . 
H21A H -0.1423 0.4937 0.5595 0.072 Uiso 1 1 calc R . . 
H21B H -0.1744 0.5300 0.6768 0.072 Uiso 1 1 calc R . . 
H21C H -0.1588 0.4730 0.7107 0.072 Uiso 1 1 calc R . . 
 
loop_ 
 _atom_site_aniso_label 
 _atom_site_aniso_U_11 
 _atom_site_aniso_U_22 
 _atom_site_aniso_U_33 
 _atom_site_aniso_U_23 
 _atom_site_aniso_U_13 
 _atom_site_aniso_U_12 
Br1 0.03184(13) 0.03707(13) 0.02141(11) 0.00047(9) 0.00926(9) 0.00292(9) 
Ni1 0.02515(14) 0.02801(15) 0.01205(12) -0.00064(10) 0.00424(10) -0.00097(11) 
O1 0.0375(10) 0.0427(10) 0.0522(11) -0.0122(9) 0.0091(8) 0.0043(8) 
N1 0.0283(9) 0.0283(9) 0.0174(8) 0.0014(7) 0.0083(7) -0.0012(7) 
N2 0.0268(9) 0.0270(9) 0.0148(8) -0.0001(7) 0.0064(7) -0.0003(7) 
N3 0.0272(9) 0.0328(10) 0.0143(8) -0.0028(7) 0.0036(7) -0.0002(8) 
N4 0.0241(9) 0.0327(10) 0.0140(8) -0.0001(7) 0.0049(7) 0.0017(7) 
C1 0.0257(10) 0.0258(10) 0.0169(9) 0.0004(8) 0.0078(8) 0.0005(8) 
C2 0.0319(12) 0.0320(12) 0.0163(9) 0.0026(8) 0.0081(8) 0.0076(9) 
C3 0.0255(11) 0.0327(11) 0.0161(9) -0.0013(8) 0.0041(8) 0.0063(9) 
C4 0.0399(14) 0.0376(13) 0.0325(12) 0.0015(10) 0.0140(11) -0.0103(11) 
C5 0.0571(17) 0.0401(14) 0.0221(11) 0.0106(10) 0.0134(11) 0.0078(12) 
C6 0.0348(13) 0.0402(13) 0.0224(11) -0.0064(9) 0.0021(9) 0.0020(10) 
C7 0.0493(15) 0.0301(12) 0.0262(11) -0.0022(9) 0.0136(10) -0.0096(11) 
C8 0.0248(11) 0.0300(11) 0.0168(9) -0.0017(8) 0.0070(8) 0.0014(8) 
C9 0.0279(11) 0.0351(12) 0.0142(9) -0.0019(8) 0.0051(8) 0.0060(9) 
C10 0.0245(11) 0.0357(12) 0.0148(9) 0.0005(8) 0.0061(8) 0.0075(9) 
C11 0.0346(13) 0.0361(13) 0.0258(11) -0.0030(9) 0.0075(9) -0.0064(10) 
C12 0.0324(12) 0.0470(14) 0.0183(10) -0.0047(10) 0.0030(9) 0.0014(11) 
C13 0.0335(12) 0.0421(13) 0.0222(11) 0.0061(10) 0.0109(9) 0.0074(10) 
C14 0.0276(11) 0.0392(13) 0.0250(11) -0.0012(9) 0.0077(9) -0.0044(10) 
C15 0.0308(12) 0.0359(12) 0.0136(9) -0.0005(8) 0.0052(8) 0.0009(9) 
C16 0.0331(12) 0.0360(13) 0.0264(11) -0.0075(9) 0.0066(9) -0.0030(10) 
C17 0.0266(11) 0.0411(13) 0.0235(11) -0.0054(10) 0.0017(9) -0.0008(10) 
C18 0.0365(13) 0.0339(12) 0.0237(11) 0.0015(9) 0.0081(9) 0.0034(10) 
C19 0.0396(13) 0.0294(12) 0.0287(11) 0.0016(9) 0.0120(10) -0.0025(10) 
C20 0.0301(12) 0.0322(12) 0.0268(11) 0.0024(9) 0.0093(9) -0.0023(9) 
C21 0.0352(14) 0.0536(17) 0.0532(17) -0.0040(14) 0.0146(12) 0.0052(13) 
 
_geom_special_details 
; 
 All esds (except the esd in the dihedral angle between two l.s. planes) 
 are estimated using the full covariance matrix.  The cell esds are taken 
 into account individually in the estimation of esds in distances, angles 
 and torsion angles; correlations between esds in cell parameters are only 
 used when they are defined by crystal symmetry.  An approximate (isotropic) 
 treatment of cell esds is used for estimating esds involving l.s. planes. 
; 
 
loop_ 
 _geom_bond_atom_site_label_1 
 _geom_bond_atom_site_label_2 
 _geom_bond_distance 
 _geom_bond_site_symmetry_2 
 _geom_bond_publ_flag 
Br1 Ni1 2.4189(3) . ? 
Ni1 C15 1.904(2) . ? 
Ni1 C8 1.906(2) . ? 
Ni1 C1 1.907(2) . ? 
O1 C18 1.386(3) . ? 
O1 C21 1.416(3) . ? 
N1 C1 1.349(3) . ? 
N1 C2 1.397(3) . ? 
N1 C4 1.449(3) . ? 
N2 C1 1.356(3) . ? 
N2 C3 1.402(3) . ? 
N2 C7 1.452(3) . ? 
N3 C8 1.353(3) . ? 
N3 C9 1.403(3) . ? 
N3 C11 1.457(3) . ? 
N4 C8 1.355(3) . ? 
N4 C10 1.398(3) . ? 
N4 C14 1.455(3) . ? 
C2 C3 1.348(3) . ? 
C2 C5 1.495(3) . ? 
C3 C6 1.495(3) . ? 
C4 H4A 0.9800 . ? 
C4 H4B 0.9800 . ? 
C4 H4C 0.9800 . ? 
C5 H5A 0.9800 . ? 
C5 H5B 0.9800 . ? 
C5 H5C 0.9800 . ? 
C6 H6A 0.9800 . ? 
C6 H6B 0.9800 . ? 
C6 H6C 0.9800 . ? 
C7 H7A 0.9800 . ? 
C7 H7B 0.9800 . ? 
C7 H7C 0.9800 . ? 
C9 C10 1.341(3) . ? 
C9 C12 1.494(3) . ? 
C10 C13 1.496(3) . ? 
C11 H11A 0.9800 . ? 
C11 H11B 0.9800 . ? 
C11 H11C 0.9800 . ? 
C12 H12A 0.9800 . ? 
C12 H12B 0.9800 . ? 
C12 H12C 0.9800 . ? 
C13 H13A 0.9800 . ? 
C13 H13B 0.9800 . ? 
C13 H13C 0.9800 . ? 
C14 H14A 0.9800 . ? 
C14 H14B 0.9800 . ? 
C14 H14C 0.9800 . ? 
C15 C16 1.386(3) . ? 
C15 C20 1.412(3) . ? 
C16 C17 1.404(3) . ? 
C16 H16 0.9500 . ? 
C17 C18 1.376(3) . ? 
C17 H17 0.9500 . ? 
C18 C19 1.377(3) . ? 
C19 C20 1.379(3) . ? 
C19 H19 0.9500 . ? 
C20 H20 0.9500 . ? 
C21 H21A 0.9800 . ? 
C21 H21B 0.9800 . ? 
C21 H21C 0.9800 . ? 
 
loop_ 
 _geom_angle_atom_site_label_1 
 _geom_angle_atom_site_label_2 
 _geom_angle_atom_site_label_3 
 _geom_angle 
 _geom_angle_site_symmetry_1 
 _geom_angle_site_symmetry_3 
 _geom_angle_publ_flag 
C15 Ni1 C8 88.20(9) . . ? 
C15 Ni1 C1 88.30(9) . . ? 
C8 Ni1 C1 170.48(9) . . ? 
C15 Ni1 Br1 166.86(7) . . ? 
C8 Ni1 Br1 92.25(6) . . ? 
C1 Ni1 Br1 93.18(6) . . ? 
C18 O1 C21 117.6(2) . . ? 
C1 N1 C2 111.86(18) . . ? 
C1 N1 C4 122.49(18) . . ? 
C2 N1 C4 125.63(18) . . ? 
C1 N2 C3 111.63(17) . . ? 
C1 N2 C7 123.80(17) . . ? 
C3 N2 C7 124.49(18) . . ? 
C8 N3 C9 111.45(18) . . ? 
C8 N3 C11 123.65(18) . . ? 
C9 N3 C11 124.88(18) . . ? 
C8 N4 C10 111.85(18) . . ? 
C8 N4 C14 123.53(17) . . ? 
C10 N4 C14 124.51(18) . . ? 
N1 C1 N2 104.01(17) . . ? 
N1 C1 Ni1 128.91(16) . . ? 
N2 C1 Ni1 127.03(15) . . ? 
C3 C2 N1 106.46(18) . . ? 
C3 C2 C5 131.3(2) . . ? 
N1 C2 C5 122.1(2) . . ? 
C2 C3 N2 106.04(18) . . ? 
C2 C3 C6 131.7(2) . . ? 
N2 C3 C6 122.2(2) . . ? 
N1 C4 H4A 109.5 . . ? 
N1 C4 H4B 109.5 . . ? 
H4A C4 H4B 109.5 . . ? 
N1 C4 H4C 109.5 . . ? 
H4A C4 H4C 109.5 . . ? 
H4B C4 H4C 109.5 . . ? 
C2 C5 H5A 109.5 . . ? 
C2 C5 H5B 109.5 . . ? 
H5A C5 H5B 109.5 . . ? 
C2 C5 H5C 109.5 . . ? 
H5A C5 H5C 109.5 . . ? 
H5B C5 H5C 109.5 . . ? 
C3 C6 H6A 109.5 . . ? 
C3 C6 H6B 109.5 . . ? 
H6A C6 H6B 109.5 . . ? 
C3 C6 H6C 109.5 . . ? 
H6A C6 H6C 109.5 . . ? 
H6B C6 H6C 109.5 . . ? 
N2 C7 H7A 109.5 . . ? 
N2 C7 H7B 109.5 . . ? 
H7A C7 H7B 109.5 . . ? 
N2 C7 H7C 109.5 . . ? 
H7A C7 H7C 109.5 . . ? 
H7B C7 H7C 109.5 . . ? 
N3 C8 N4 103.88(17) . . ? 
N3 C8 Ni1 131.44(16) . . ? 
N4 C8 Ni1 124.69(15) . . ? 
C10 C9 N3 106.58(18) . . ? 
C10 C9 C12 130.8(2) . . ? 
N3 C9 C12 122.6(2) . . ? 
C9 C10 N4 106.25(18) . . ? 
C9 C10 C13 132.0(2) . . ? 
N4 C10 C13 121.8(2) . . ? 
N3 C11 H11A 109.5 . . ? 
N3 C11 H11B 109.5 . . ? 
H11A C11 H11B 109.5 . . ? 
N3 C11 H11C 109.5 . . ? 
H11A C11 H11C 109.5 . . ? 
H11B C11 H11C 109.5 . . ? 
C9 C12 H12A 109.5 . . ? 
C9 C12 H12B 109.5 . . ? 
H12A C12 H12B 109.5 . . ? 
C9 C12 H12C 109.5 . . ? 
H12A C12 H12C 109.5 . . ? 
H12B C12 H12C 109.5 . . ? 
C10 C13 H13A 109.5 . . ? 
C10 C13 H13B 109.5 . . ? 
H13A C13 H13B 109.5 . . ? 
C10 C13 H13C 109.5 . . ? 
H13A C13 H13C 109.5 . . ? 
H13B C13 H13C 109.5 . . ? 
N4 C14 H14A 109.5 . . ? 
N4 C14 H14B 109.5 . . ? 
H14A C14 H14B 109.5 . . ? 
N4 C14 H14C 109.5 . . ? 
H14A C14 H14C 109.5 . . ? 
H14B C14 H14C 109.5 . . ? 
C16 C15 C20 115.3(2) . . ? 
C16 C15 Ni1 126.88(17) . . ? 
C20 C15 Ni1 117.77(17) . . ? 
C15 C16 C17 122.9(2) . . ? 
C15 C16 H16 118.5 . . ? 
C17 C16 H16 118.5 . . ? 
C18 C17 C16 119.2(2) . . ? 
C18 C17 H17 120.4 . . ? 
C16 C17 H17 120.4 . . ? 
C17 C18 C19 119.9(2) . . ? 
C17 C18 O1 124.5(2) . . ? 
C19 C18 O1 115.6(2) . . ? 
C18 C19 C20 120.1(2) . . ? 
C18 C19 H19 119.9 . . ? 
C20 C19 H19 119.9 . . ? 
C19 C20 C15 122.5(2) . . ? 
C19 C20 H20 118.7 . . ? 
C15 C20 H20 118.7 . . ? 
O1 C21 H21A 109.5 . . ? 
O1 C21 H21B 109.5 . . ? 
H21A C21 H21B 109.5 . . ? 
O1 C21 H21C 109.5 . . ? 
H21A C21 H21C 109.5 . . ? 
H21B C21 H21C 109.5 . . ? 
 
loop_ 
 _geom_torsion_atom_site_label_1 
 _geom_torsion_atom_site_label_2 
 _geom_torsion_atom_site_label_3 
 _geom_torsion_atom_site_label_4 
 _geom_torsion 
 _geom_torsion_site_symmetry_1 
 _geom_torsion_site_symmetry_2 
 _geom_torsion_site_symmetry_3 
 _geom_torsion_site_symmetry_4 
 _geom_torsion_publ_flag 
C2 N1 C1 N2 0.1(2) . . . . ? 
C4 N1 C1 N2 -178.2(2) . . . . ? 
C2 N1 C1 Ni1 -177.42(16) . . . . ? 
C4 N1 C1 Ni1 4.2(3) . . . . ? 
C3 N2 C1 N1 -0.3(2) . . . . ? 
C7 N2 C1 N1 176.6(2) . . . . ? 
C3 N2 C1 Ni1 177.33(15) . . . . ? 
C7 N2 C1 Ni1 -5.8(3) . . . . ? 
C15 Ni1 C1 N1 83.4(2) . . . . ? 
C8 Ni1 C1 N1 151.8(5) . . . . ? 
Br1 Ni1 C1 N1 -83.55(19) . . . . ? 
C15 Ni1 C1 N2 -93.6(2) . . . . ? 
C8 Ni1 C1 N2 -25.2(7) . . . . ? 
Br1 Ni1 C1 N2 99.44(18) . . . . ? 
C1 N1 C2 C3 0.1(2) . . . . ? 
C4 N1 C2 C3 178.4(2) . . . . ? 
C1 N1 C2 C5 -176.8(2) . . . . ? 
C4 N1 C2 C5 1.5(3) . . . . ? 
N1 C2 C3 N2 -0.2(2) . . . . ? 
C5 C2 C3 N2 176.3(2) . . . . ? 
N1 C2 C3 C6 -178.3(2) . . . . ? 
C5 C2 C3 C6 -1.8(4) . . . . ? 
C1 N2 C3 C2 0.3(2) . . . . ? 
C7 N2 C3 C2 -176.6(2) . . . . ? 
C1 N2 C3 C6 178.7(2) . . . . ? 
C7 N2 C3 C6 1.8(3) . . . . ? 
C9 N3 C8 N4 0.0(2) . . . . ? 
C11 N3 C8 N4 178.42(19) . . . . ? 
C9 N3 C8 Ni1 -179.88(16) . . . . ? 
C11 N3 C8 Ni1 -1.5(3) . . . . ? 
C10 N4 C8 N3 -0.4(2) . . . . ? 
C14 N4 C8 N3 175.95(19) . . . . ? 
C10 N4 C8 Ni1 179.53(15) . . . . ? 
C14 N4 C8 Ni1 -4.1(3) . . . . ? 
C15 Ni1 C8 N3 -97.2(2) . . . . ? 
C1 Ni1 C8 N3 -165.6(5) . . . . ? 
Br1 Ni1 C8 N3 69.7(2) . . . . ? 
C15 Ni1 C8 N4 82.93(19) . . . . ? 
C1 Ni1 C8 N4 14.5(7) . . . . ? 
Br1 Ni1 C8 N4 -110.21(18) . . . . ? 
C8 N3 C9 C10 0.3(2) . . . . ? 
C11 N3 C9 C10 -178.0(2) . . . . ? 
C8 N3 C9 C12 -179.4(2) . . . . ? 
C11 N3 C9 C12 2.2(3) . . . . ? 
N3 C9 C10 N4 -0.6(2) . . . . ? 
C12 C9 C10 N4 179.2(2) . . . . ? 
N3 C9 C10 C13 177.7(2) . . . . ? 
C12 C9 C10 C13 -2.6(4) . . . . ? 
C8 N4 C10 C9 0.6(2) . . . . ? 
C14 N4 C10 C9 -175.7(2) . . . . ? 
C8 N4 C10 C13 -177.87(19) . . . . ? 
C14 N4 C10 C13 5.8(3) . . . . ? 
C8 Ni1 C15 C16 -110.0(2) . . . . ? 
C1 Ni1 C15 C16 61.2(2) . . . . ? 
Br1 Ni1 C15 C16 157.84(19) . . . . ? 
C8 Ni1 C15 C20 73.01(17) . . . . ? 
C1 Ni1 C15 C20 -115.84(17) . . . . ? 
Br1 Ni1 C15 C20 -19.2(4) . . . . ? 
C20 C15 C16 C17 0.6(3) . . . . ? 
Ni1 C15 C16 C17 -176.42(17) . . . . ? 
C15 C16 C17 C18 0.6(4) . . . . ? 
C16 C17 C18 C19 -1.5(3) . . . . ? 
C16 C17 C18 O1 179.6(2) . . . . ? 
C21 O1 C18 C17 -14.9(4) . . . . ? 
C21 O1 C18 C19 166.2(2) . . . . ? 
C17 C18 C19 C20 1.1(3) . . . . ? 
O1 C18 C19 C20 -179.9(2) . . . . ? 
C18 C19 C20 C15 0.2(3) . . . . ? 
C16 C15 C20 C19 -1.1(3) . . . . ? 
Ni1 C15 C20 C19 176.27(17) . . . . ? 
 
_diffrn_measured_fraction_theta_max    0.997 
_diffrn_reflns_theta_full              27.86 
_diffrn_measured_fraction_theta_full   0.997 
_refine_diff_density_max    0.899 
_refine_diff_density_min   -0.744 
_refine_diff_density_rms    0.064 

#===END
